# Supplementary material for: Persistence and Availability of Web Services in Computational Biology
Source: PLoS One. 2011 Sep 22;6(9):e24914. doi: 10.1371/journal.pone.0024914 (PMC3178567; doi:10.1371/journal.pone.0024914)
Supplement: Dataset S1 — Main Web services data points tables. Tables, by year, of all data collected on the services studied in the manuscript. All fields used to calculate the LT-Score for each of the services are included. For the original Web addresses extracted from the abstracts, refer to Dataset S2. (XLS) [file pone.0024914.s001.xls]

## Sheet: NAR-WebServerIssue2003
Name	LT-Score (single service)	LT-Score (collection)	URL (redirect or from Links Directory)	Service Reachable	Error message	Type	Version	Country	Institution	Updated (Website)	Updated (Mozilla)	Login/Registration	Usability	Download required	Example Data	Documentation/Help	Server operational	Fair Testing Possibility	Citations in PMC	Orig URL functional	Redirect/Link	Search Engine
3D-Jury	0	0	http://bioinfo.pl/Meta/	yes	--	--	--	Polen	BioInfoBank Institute	--	--	--	--	--	--	--	no	no	16	--	--	yes
3DCoffee	38	0	http://igs-server.cnrs-mrs.fr/Tcoffee/tcoffee_cgi/index.cgi	yes	--	--	--	Frankreich	CNRS	--	--	no	2	no	yes	yes	yes	yes	44	yes
3Matrix	14	0	http://motif.stanford.edu/distributions/3matrix/	yes	--	--	--	USA	Stanford	--	2007	no	--	yes	no	no	--	no	1	yes
3Motif	15	0	http://3motif.stanford.edu/	yes	--	--	--	USA	Stanford	2002	2007	no	--	yes	no	no	--	no	1	yes
ActionMap	18	0	http://cms.moulon.inra.fr/index.php?option=com_content&task=view&id=12&Itemid=41	yes	--	--	1.01	Frankreich	INRA	2003	2003	no	2	yes	--	--	--	no	2	--	--	yes
AHMII	28	0	http://www.wdcm.org/AHMII/ahmii.html	yes	--	Datenbank	--	Japan	WFCC	2008	2008	no	2	no	--	no	yes	yes	0	yes
ALGGEN	1	9	http://alggen.lsi.upc.es/	yes	--	Sammlung	--	Spanien	UPC	2001	--	--	1	no	--	--	--	--	17	--	yes
AMIGene	24	0	http://www.genoscope.cns.fr/agc/tools/amigene/Form/form.php	yes	--	--	--	Frankreich	CNS/GÃ©noscope	2003	--	no	2	no	no	yes	--	no	23	--	--	yes
Bioverse	36	0	http://bioverse.compbio.washington.edu/	yes	--	--	--	USA	UW	2006	--	no	3	no	no	yes	yes	yes	7	yes
BLAST2SRS	0	0	http://blast2srs.embl.de/	yes	--	--	--	Deutschland	EMBL	--	2006	no	1	no	yes	yes	no	yes	1	yes
BPROMPT	0	0	http://www.jenner.ac.uk/BPROMPT/	yes	--	--	--	UK	Jenner Institute	--	2005	no	2	no	no	no	no	yes	7	yes
CASTp	33	0	http://sts.bioengr.uic.edu/castp/	yes	--	Datenbank	--	USA	UIC	2005	--	--	3	no	no	yes	yes	yes	46	--	yes
ChipInfo	0	0	http://genomics.bioen.uiuc.edu/chipinfo/	yes	--	--	--	USA	Harvard	2008	--	no	3	no	no	yes	no	yes	27	--	yes
CLOURE	0	0	http://imtech.res.in/~anand/cloure.html	no	Seiten-Ladefehler	--	--	Indien	IMTECH	--	--	--	--	--	--	--	no	no	0	--	--	--
ClustalW	39	0	http://www.ebi.ac.uk/Tools/clustalw2/index.html	yes	--	--	--	UK	EBI	--	2009	no	3	no	yes	yes	yes	yes	608	--	yes
Cluster Buster	35	0	http://zlab.bu.edu/cluster-buster/	yes	--	--	--	USA	BU	--	2007	no	3	no	no	yes	yes	yes	45	yes
CODEHOP	39	0	http://blocks.fhcrc.org/codehop.html	yes	--	--	--	USA	FHCRC	2007	2009	no	2	no	yes	yes	yes	yes	26	yes
CRP	27	0	http://fasta.bioch.virginia.edu/crp/	yes	--	--	--	USA	UVa	--	--	no	2	no	no	no	yes	yes	6	yes
DePie	21	0	http://bioinformatics.unl.edu/	yes	--	--	--	USA	UNL	2009	--	yes	2	no	no	yes	--	no	1	--	yes
DEREF	0	0	http://sdmc.lit.org.sg/ERE-V2/index	no	404	--	--	Singapur	LIT	--	--	no	--	--	--	--	no	no	18	--	--	--
DGSF	0	0	http://sdmc.lit.org.sg/promoter/dragonGSF1_0/genestart.htm	no	404	--	--	Singapur	LIT	--	--	no	--	--	--	--	no	no	5	--	--	--
DNannotator	1	9	http://bioinfo.bsd.uchicago.edu/DNannotator.htm	yes	--	Sammlung	--	USA	Chicago Uni	2003	2009	--	1	no	--	--	--	--	1	--	--	yes
DNAtools	1	7	http://hydra.icgeb.trieste.it/~kristian/dna/	yes	--	Sammlung	--	Italien	Triest Uni	1999	2003	--	2	no	--	--	--	--	14	--	--	yes
DSSPcont	34	0	http://cubic.bioc.columbia.edu/services/DSSPcont/	yes	--	--	--	USA	Columbia University	--	2007	no	2	no	no	yes	yes	yes	13	yes
ELM	36	0	http://elm.eu.org/	yes	--	--	--	Deutschland	ELM Consortium	2009	2009	no	3	no	no	yes	yes	yes	104	yes
ENDscript	0	0	http://espript.ibcp.fr/ESPript/ENDscript/index.php	yes	--	--	v1.1	Frankreich	IBCP	--	--	no	2	no	yes	yes	no	no	63	--	yes
EnteriX	1	6	http://globin.cse.psu.edu/enterix/	yes	--	Sammlung	--	USA	Penn State	2009	2009	--	1	no	--	--	--	--	9	--	yes
ESEFinder	40	0	http://rulai.cshl.edu/cgi-bin/tools/ESE3/esefinder.cgi?process=home	yes	--	--	v3.0	USA	CSHL	2007	--	no	2	no	yes	yes	yes	yes	159	--	--	yes
ESPript	24	0	http://espript.ibcp.fr/ESPript/ESPript/index.php	yes	--	--	v2.2	Frankreich	IBCP	--	--	no	2	no	no	yes	--	no	63	--	yes
ESTAnnotator	0	0	http://genome.dkfz-heidelberg.de/menu/biounit/examples/estannotator/estannotator_result.html	yes	--	--	--	Deutschland	DKFZ	2003	2003	no	1	no	yes	yes	no	no	13	--	--	yes
ETOPE	11	0	http://nekrut.uchicago.edu/etope/	no	Server not found	--	--	USA	Chicago Uni	--	--	no	--	--	--	--	--	--	5	--	--	--
EUGENEâ€˜HOM	35	0	http://bioinfo.genotoul.fr/apps/eugene/EuGeneHom/cgi-bin/EuGeneHom.pl	yes	--	--	--	Frankreich	GÃ©nopole Toulouse	2003	--	no	2	no	no	yes	yes	yes	9
EVA	26	0	http://cubic.bioc.columbia.edu/eva/	yes	--	Datenbank	--	USA	Columbia University	2001	2002	no	2	no	no	yes	--	--	28	yes
ExPASy Molecular Biology Server	1	10	http://www.expasy.org/	yes	--	Sammlung	--	Schweiz	SIB	2009	--	--	2	no	--	--	--	--	136	yes
ExpressYourself	28	0	http://array.mbb.yale.edu/analysis/	yes	--	--	--	USA	Yale	--	--	Email	3	no	yes	yes	--	yes	15	--	yes
FIE2.0	0	0	http://research.i2r.a-star.edu.sg/FIE2.0/	no	404	--	--	Singapur	A-Star	--	--	--	--	--	--	--	no	no	3	--	--	--
FootPrinter	33	0	http://bio.cs.washington.edu/software.html	yes	--	--	v3.01	USA	UW	2008	2009	no	2	no	no	yes	yes	yes	30	yes
FrameD	39	0	http://bioinfo.genotoul.fr/apps/FrameD/FD	yes	--	--	--	Frankreich	GÃ©nopole Toulouse	2003	--	no	2	no	yes	yes	yes	yes	20
GeneFizz	23	0	http://pbga.pasteur.fr/GeneFizz/	yes	--	--	--	Frankreich	Pasteur	2003	--	Email	2	no	no	no	--	yes	5	yes
GenePublisher	25	0	http://www.cbs.dtu.dk/services/GenePublisher	yes	--	--	v1.03	DÃ¤nemark	CBS/TU Denmark	2006	--	no	2	no	no	yes	--	no	13	yes
GeneSeqer	34	0	http://www.plantgdb.org/PlantGDB-cgi/GeneSeqer/PlantGDBgs.cgi	yes	404	--	--	USA	PlantGDB	--		no	2	no	no	yes	yes	yes	11	--	--	yes
GeneSilico	0	0	http://genesilico.pl/meta	yes	--	--	--	Polen	IIMCB	--	--	--	--	--	--	--	no	no	50	--	--	yes
Geno2Pheno	40	0	http://www.geno2pheno.org/cgi-bin/geno2pheno.pl	yes	--	--	--	Deutschland	MPI Informatik	2009	--	no	3	no	yes	yes	yes	yes	11	--	--	yes
GEPAS	1	12	http://www.gepas.org/	yes	--	Sammlung	v4.0	USA	CIPF	2009	--	--	3	no	--	--	--	--	43	--	--	yes
Gibbs Motif Sampler	0	0	http://bayesweb.wadsworth.org/gibbs/gibbs.html	yes	--	--	--	USA	Wadsworth Center	--	2008	no	2	no	no	yes	no	no	67	yes
GlobPlot	40	0	http://globplot.embl.de/	yes	--	--	v2.3	Deutschland	EMBL	2006	--	no	2	no	yes	yes	yes	yes	81	yes
GOblet	0	0	http://goblet.molgen.mpg.de/	yes	--	--	--	Deutschland	MPI MolGen	2008		yes	3	no	yes	yes	no	yes	13	yes
GPRM	0	0	http://bioinfo.cis.nctu.edu.tw/service/gprm/	no	Netzwerk ZeitÃ¼berschreitung	--	--	Taiwan	NCTU	--	--	--	--	--	--	--	no	no	5	--	--	--
IBM Bioinformatics and Pattern Discovery Group	38	0	http://cbcsrv.watson.ibm.com/Tspd.html	yes	--	--	--	USA	IBM Bioinformatics Group	--	2008	no	2	no	yes	yes	yes	yes	1	yes
INCLUSive	1	10	http://www.esat.kuleuven.ac.be/inclusive	yes	--	Sammlung	--	Belgien	Leuven KU	2003	--	--	2	no	--	--	--	--	15	yes
Institute of Enzymology Servers	1	7	http://www.enzim.hu/servers.html	yes	--	Sammlung	--	Ungarn	Institute of Enzymology	--	2007	--	3	no	--	--	--	--	0	yes
iSPOT	37	0	http://cbm.bio.uniroma2.it/ispot/	yes	--	--	--	Italien	Tor Vergata	--	2003	no	1	no	yes	yes	yes	yes	5	yes
JVirGel	36	0	http://www.jvirgel.de/	yes	--	--	v2.0	Deutschland	Braunschweig TU	2006	--	no	2	no	no	yes	yes	yes	9	--	yes
LGA	0	0	http://as2ts.llnl.gov/AS2TS/LGA/lga.html	yes	--	--	--	USA	LLNL	--	--	--	--	--	--	--	no	no	58	--	--	yes
LNAtools	1	11	http://lnatools.com/	yes	--	Sammlung	--	DÃ¤nemark	Exiqon	--	--	--	3	no	--	--	--	--	17	yes
Loc3D	0	0	http://cubic.bioc.columbia.edu/db/LOC3d/	yes	--	--	--	USA	Columbia University	2002	2008	no	2	no	no	no	no	yes	6	yes
MAK	0	0	http://perl.idmb.tamu.edu/mak.htm	yes	Weiterleitung an: http://wesslercluster.plantbio.uga.edu/mak06.html	--	--	USA	TAMU	2007		no	2	no	yes	yes	no	no	4	yes
Match	8	0	http://www.gene-regulation.com/cgi-bin/pub/programs/match/bin/match.cgi?	yes	--	--	--	Deutschland	Biobase GmbH	--	--	yes	--	--	--	--	--	no	146	--	yes
MATRAS	0	0	http://biunit.aist-nara.ac.jp/Matras/	no	404	--	--	Japan	NAIST	--	--	--	--	--	--	--	no	no	23	--	--	--
MAVID	0	0	http://baboon.math.berkeley.edu/mavid/	no	Seiten-Ladefehler	--	v2.0.4	USA	Berkeley	2006	2008	no	2	no	yes	yes	no	yes	19	--	--	--
Meta-PP	0	0	http://cubic.bioc.columbia.edu/meta/	no	404	--	--	USA	Columbia University	--	--	--	--	--	--	--	no	no	3	--	--	--
Mfold	0	0	http://www.bioinfo.rpi.edu/applications/mfold/old/rna/	yes	--	--	--	USA	RPI	--	2008	--	2	no	no	--	no	yes	995	--	yes
MGAlignIt	38	0	http://origin.bic.nus.edu.sg/mgalign/mgalignit.html	yes	--	--	--	Singapur	NUS	--	2004	no	2	no	yes	yes	yes	yes	5	yes
MHCPred	36	0	http://www.jenner.ac.uk/MHCPred/	yes	--	--	v2.0	UK	Jenner Institute	2008	--	no	2	no	yes	no	yes	yes	14	yes
Modeller	20	0	http://salilab.org/modeller/	yes	--	--	9v5	USA	UCSF	2009	2009	yes	3	yes	no	yes	--	no	29	--	yes
MolSurfer	39	0	http://projects.villa-bosch.de/dbase/molsurfer/	yes	--	--	--	Deutschland	EML	2003	2007	no	2	no	yes	yes	yes	yes	5	yes
Motif3D	38	0	http://umber.sbs.man.ac.uk/dbbrowser/motif3d/motif3d.html	yes	--	--	--	UK	Manchester Uni	--	2004	no	2	no	yes	yes	yes	yes	3	yes
mreps	40	0	http://bioinfo.lifl.fr/mreps/	yes	--	--	v2.5	Frankreich	LIFL/USTL	--	2006	no	3	no	yes	yes	yes	yes	18
NCI	8	0	http://www.mrc-lmb.cam.ac.uk/genomes/nci/	no	Maintenance	--	--	UK	Cambridge Uni	--	--	--	--	--	--	--	--	--	2	--	--	--
NDB Tools	1	10	http://ndbserver.rutgers.edu/services/	yes	--	Sammlung	--	USA	Rutgers	2009	2009	--	2	no	--	--	--	--	29	yes
NEBcutter	35	0	http://tools.neb.com/NEBcutter/index.php3	yes	--	--	v2.0	USA	New England Biolabs	--	--	no	2	no	no	yes	yes	yes	19	yes
NEWT	0	0	http://www.ebi.ac.uk/newt/display	yes	Weiterleitung an: http://www.uniprot.org/taxonomy/	--	--	UK	EBI	--	--	no	--	--	--	--	no	no	8	--	yes
NORSp	40	0	http://cubic.bioc.columbia.edu/services/NORSp/	yes	--	--	--	USA	Columbia University	2008	--	no	3	no	yes	yes	yes	yes	22	yes
NRSAS	1	9	http://www.receptors.org/NR/servers/html/	yes	--	Sammlung	--	Niederlande	--	2003	2005	--	2	no	--	--	--	--	0	--	--	yes
OligoWiz	22	0	http://www.cbs.dtu.dk/services/OligoWiz2/	yes	--	--	v2.0	DÃ¤nemark	CBS/TU Denmark	2008	--	no	2	yes	no	yes	--	no	31	--	yes
Onto-Tools	1	10	http://vortex.cs.wayne.edu/Projects.html	yes	--	Sammlung	--	USA	Wayne	--	2009	--	3	no	--	--	--	--	74	yes
PARSESNP	27	0	http://www.proweb.org/parsesnp/	yes	--	--	--	USA	FHCRC	2001	2005	no	1	no	yes	yes	--	no	12	yes
PatSearch	19	0	http://bighost.area.ba.cnr.it/BIG/PatSearch/	no	--	--	--	Italien	CNR	--	2006	Email	2	no	no	yes	--	no	24	--	--	--
PBIL	1	10	http://pbil.univ-lyon1.fr/	yes	--	Sammlung	--	Frankreich	Lyon 1	2008	2009	--	2	no	--	--	--	--	5	yes
PDA	39	0	http://dbb.nhri.org.tw/primer/	yes	--	--	--	Taiwan	NHRI	2008	2009	no	2	no	yes	yes	yes	yes	8	yes
Pfold	30	0	http://www.daimi.au.dk/~compbio/pfold	yes	--	--	--	DÃ¤nemark	Aarhus Uni	--	2006	Email	2	no	yes	yes	--	yes	50	yes
Phydbac2	38	0	http://igs-server.cnrs-mrs.fr/phydbac/	yes	--	--	--	Frankreich	CNRS	--	2008	no	2	no	yes	yes	yes	yes	4	yes
PINTS	39	0	http://www.russell.embl.de/pints/	yes	Probleme mit dem PINTS Server (2008)	--	--	Deutschland	EMBL	2008	2006	no	2	no	yes	yes	yes	yes	28	--	yes
PipeAlign	33	0	http://bips.u-strasbg.fr/PipeAlign/	no	--	--	--	Frankreich	Strasburg Louis Pasteur	--	2008	no	3	no	no	yes	yes	yes	17	--	--	--
PipMaker	1	10	http://bio.cse.psu.edu/	yes	--	Sammlung	--	USA	Penn State	2009	2009	--	2	no	--	--	--	--	55	yes
POPS	0	0	http://ibivu.cs.vu.nl/programs/popswww/	yes	--	--	--	Niederlande	Amsterdam Uni	2009	--	no	2	no	no	yes	no	yes	7	--	yes
PredictProtein	21	0	http://www.predictprotein.org/	yes	--	--	--	USA	Columbia University	2008	--	yes	2	no	no	yes	--	no	40	yes
PROBEmer	8	0	http://probemer.cs.loyola.edu/	no	Maintenance	--	--	USA	Loyola Uni	--	--	--	--	--	--	--	--	--	17	--	--	--
PromH	40	0	http://www.softberry.com/berry.phtml?topic=promhg&group=programs&subgroup=promoter	yes	--	--	--	USA	Softberry Inc.	2007	--	no	3	no	yes	yes	yes	yes	12	yes
PromoSer	34	0	http://biowulf.bu.edu/zlab/PromoSer/	yes	--	--	--	USA	Boston University	--	2006	no	2	no	no	yes	yes	yes	18	yes
Protinfo	21	0	http://protinfo.compbio.washington.edu/	yes	--	--	--	USA	UW	--	--	Email	2	no	no	yes	--	no	6	yes
PSEUDOVIEWER	40	0	http://wilab.inha.ac.kr/pseudoviewer2/	yes	--	--	--	SÃ¼dkorea	Inha University	2009	--	no	3	no	yes	yes	yes	yes	8	yes
PSORT.org	35	0	http://www.psort.org/	yes	--	--	v2.0.4	Kanada	SFU	2009		no	1	no	no	yes	yes	yes	62	yes
RbDe	21	0	http://icb.med.cornell.edu/crt/RbDe/index.xml	yes	--	--	--	USA	Cornell	2009	--	yes	2	no	no	yes	--	no	1	--	--	yes
REDUCE	24	0	http://bussemaker.bio.columbia.edu/reduce/	yes	--	--	--	USA	Columbia	--	--	yes	2	no	yes	yes	--	no	13	yes
RevTrans	0	0	http://www.cbs.dtu.dk/services/RevTrans/	yes	--	--	v1.4	DÃ¤nemark	CBS/TU Denmark	2008	--	no	2	no	no	yes	no	yes	38	yes
rMotif	1	10	http://bioportal.weizmann.ac.il/~lapidotm/rMotif/html/	yes	--	Sammlung	--	Israel	Weizmann	2007	2009	--	2	no	--	--	--	--	6	--	yes
RNA Analyzer	31	0	http://rnaanalyzer.bioapps.biozentrum.uni-wuerzburg.de/	yes	--	--	--	Deutschland	WÃ¼rzburg Uni	--	2006	no	2	no	yes	no	yes	yes	2	--	--	yes
RNA Studio	1	10	http://bibiserv.techfak.uni-bielefeld.de/bibi/Tools_RNA_Studio.html	yes	--	Sammlung	--	Deutschland	Bielefeld Uni	2009	2009	--	2	no	--	--	--	--	4	--	yes
RNAsoft	1	7	http://www.rnasoft.ca/	yes	--	Sammlung	--	Kanada	UBC	2003	2008	--	2	no	--	--	--	--	12	yes
RSAT	1	9	http://rsat.ccb.sickkids.ca/	yes	--	Sammlung	--	Kanada	--	--	2008	--	3	no	--	--	--	--	103	yes
Scansite	1	11	http://scansite.mit.edu/	yes	--	Sammlung	v2.0	USA	MIT	--	2008	--	3	no	--	--	--	--	178	yes
SEARCHPKS	38	0	http://www.nii.res.in/searchpks.html	yes	--	--	--	Indien	NII	--	2006	no	2	no	yes	yes	yes	yes	15	yes
SEM	35	0	http://dicsoft2.physics.iisc.ernet.in/sem/	yes	--	--	--	Indien	IISC	2008		no	2	no	no	yes	yes	yes	0	yes
SIFT	35	0	http://blocks.fhcrc.org/sift/SIFT.html	yes	--	--	--	USA	FHCRC	2007	2009	no	2	no	no	yes	yes	yes	123	yes
SIRW	25	0	http://sirw.embl.de/	yes	--	Datenbank	--	Deutschland	EMBL	--	2008	no	2	no	--	yes	--	--	4	yes
SiteSeer	38	0	http://rocky.bms.umist.ac.uk/SiteSeer/	yes	--	--	--	UK	Manchester Uni	--	2009	no	2	no	yes	yes	yes	yes	3	yes
SLAM	0	0	http://baboon.math.berkeley.edu/~syntenic/slam.html	no	404	--	--	USA	Berkeley	--	--	no	--	--	--	--	no	no	3	--	--	--
SMS	0	0	http://mirrors.rcsb.org/SMS/	no	404	--	--	USA	RCSB	--	--	no	--	--	--	--	no	no	9	--	--	--
SPatt	37	0	http://stat.genopole.cnrs.fr/spatt/index.html	yes	--	--	v1.3.1	Frankreich	GÃ©nopole Toulouse	2009	2006	no	2	no	yes	yes	yes	yes	1	--	--	yes
SSA	1	10	http://www.isrec.isb-sib.ch/ssa/	yes	--	Sammlung	--	Schweiz	SIB	2008		--	2	no	--	--	--	--	4	yes
SSEP	31	0	http://cluster.physics.iisc.ernet.in/ssep/options.html	yes	--	--	--	Indien	IISC	2007	2008	no	2	no	--	no	yes	yes	0	--	yes
STING Millenium	1	5	http://luna.bioc.columbia.edu/SMS/STINGm/	yes	UrsprÃ¼ngliche Seite existiert nicht mehr	Sammlung	--	USA	Columbia University	--	2009	--	1	no	--	--	--	--	9	--	--	yes
SVM-Prot	31	0	http://jing.cz3.nus.edu.sg/cgi-bin/svmprot.cgi	yes	--	--	--	Singapur	NUS	2008	--	no	2	no	no	no	yes	yes	26	yes
Swiss EMBnet	1	11	http://www.ch.embnet.org/	yes	--	Sammlung	--	Schweiz	SIB	2009	2009	--	3	no	--	--	--	--	4	--	yes
Swiss Model	24	0	http://www.expasy.ch/swissmod/SWISS-MODEL.html	yes	--	--	v8.05	Schweiz	SIB	--	2001	Email	2	no	no	yes	--	--	417	yes
T-COFFEE	38	0	http://www.tcoffee.org/	yes	--	--	--	Schweiz	SIB	--	--	no	2	no	yes	yes	yes	yes	44	yes
Target Explorer	18	0	http://trantor.bioc.columbia.edu/Target_Explorer/	no	existiert nicht mehr	--	--	USA/UK	Columbia	2006	2006	yes	1	no	no	yes	--	no	29	--	--	--
The Mendel Site	1	9	http://mendel.imp.univie.ac.at/mendeljsp/index.jsp	yes	--	Sammlung	--	Ã–sterreich	Wien Uni	--	--	--	2	no	--	--	--	--	6	--	yes
TIGR Software Tools	1	7	http://www.tigr.org/software/	yes	--	Sammlung	--	USA	J.Craig Venter Institute	--	--	--	3	no	--	--	--	--	11	--	yes
TMH Benchmark	35	0	http://cubic.bioc.columbia.edu/services/tmh_benchmark/	yes	--	--	--	USA	Columbia	--	2008	no	2	no	yes	yes	yes	yes	8	yes
TRACTS	34	0	http://bioportal.weizmann.ac.il/tracts/tracts.html	yes	--	--	--	Israel	Weizmann	--	2004	no	2	no	no	yes	yes	yes	1	yes
UniqueProt	16	0	http://cubic.bioc.columbia.edu/services/uniqueprot/	yes	..	--	--	USA	Columbia	--	--	no	2	yes	no	no	--	no	15	yes
VADAR	39	0	http://redpoll.pharmacy.ualberta.ca/vadar/	yes	--	--	v1.6	Kanada	Alberta Uni	--	2008	no	2	no	yes	yes	yes	yes	20	yes
Vienna RNA Package	1	11	http://www.tbi.univie.ac.at/~ivo/RNA/	yes	--	Sammlung	v1.8.2	Ã–sterreich	Wien Uni	2007	2009	--	2	no	--	--	--	--	210	--	yes
WEB-THERMODYN	34	0	http://www.gsa.buffalo.edu/dna/dk/WEBTHERMODYN/	yes	--	--	--	USA	Buffalo Uni	--	2004	no	2	no	no	yes	yes	yes	11	--	yes
WebFEATURE	40	0	http://feature.stanford.edu/webfeature/	yes	--	--	--	USA	Stanford	2007	--	no	3	no	yes	yes	yes	yes	12	yes
WebSIC	35	0	http://stat.genopole.cnrs.fr/websic/	yes	--	--	--	Frankreich	GÃ©nopole Toulouse	--	--	no	2	no	yes	yes	yes	yes	0	--	yes
WU BLAST	0	0	http://blast.wustl.edu/	yes	--	--	--	USA	WUSTL	2008	2008	no	2	yes	no	no	no	--	25	yes
XML Center of DDBJ	1	11	http://www.xml.nig.ac.jp/index.html	yes	--	Sammlung	--	Japan	NIG	2008	--	--	3	no	--	--	--	--	7	yes
XPlorMed	21	0	http://www.ogic.ca/projects/xplormed/	yes	--	Suchmaschine	--	Kanada	OGIC	--	2008	no	2	no	--	--	--	--	15	--	yes
YMF 3.0	35	0	http://wingless.cs.washington.edu/YMF/YMFWeb/YMFInput.pl	yes	--	--	v3.0	USA	UW	--	--	no	2	no	no	yes	yes	yes	34	--	yes

## Sheet: NAR-WebServerIssue2004
Name	LT-Score (single service)	LT-Score (collection)	URL (redirect or from Links Directory)	Service Reachable	Error message	Type	Version	Country	Institution	Updated (Website)	Updated (Mozilla)	Login/Registration	Usability	Download required	Example Data	Documentation/Help	Server operational	Fair Testing Possibility	Citations in PMC	Orig URL functional	Redirect/Link	Search Engine
3DCoffee	38	0	http://igs-server.cnrs-mrs.fr/Tcoffee/tcoffee_cgi/index.cgi	yes	--	--	--	Frankreich	CNRS	--	--	no	2	no	yes	yes	yes	yes	33	--	yes
ACMES	0	0	http://acmes.rnet.missouri.edu/	no	Verbindung fehlgeschlagen	--	--	USA	Mizzou	--	--	--	--	--	--	--	no	no	4	--	--	--
ADVICE	0	0	http://advice.i2r.a-star.edu.sg/	no	Verbindung fehlgeschlagen	--	--	Singapur	--	--	--	--	--	--	--	--	no	no	15	--	--	--
AGenDA	41	0	http://bibiserv.techfak.uni-bielefeld.de/agenda/	yes	no	--	v1.0	Deutschland	Bielefeld Uni	2008	2008	no	3	no	yes	yes	yes	yes	1	yes
ArrayPipe	26	0	http://koch.pathogenomics.ca/cgi-bin/pub/arraypipe.pl	yes	no	--	v2.0	Kanada	GenomeBC / SFU	--	--	yes	3	no	yes	yes	--	no	22	--	yes
ArrayProspector	0	0	http://string.embl-heidelberg.de:8080/prophecies_html/prophecies.html	yes	--	--	--	Deutschland	EMBL	--	--	--	--	--	--	--	no	no	5	--	yes
ArrayXPath	23	0	http://www.snubi.org/software/ArrayXPath/	yes	no	--	--	SÃ¼dkorea	SNU	--	--	no	1	no	yes	yes	--	no	10	yes
ASmodeler	39	0	http://genome.ewha.ac.kr/ECgene/ASmodeler/	yes	no	--	--	SÃ¼dkorea	EWHA	2004	2004	no	2	no	yes	yes	yes	yes	6	yes
AUGUSTUS	38	0	http://augustus.gobics.de/submission	yes	no	--	--	Deutschland	GÃ¶ttingen Uni	--	--	no	2	no	yes	yes	yes	yes	12	yes
BEARR	35	0	http://giscompute.gis.a-star.edu.sg/~vega/BEARR1.0/	yes	no	--	v1.0b	Singapur	A-Star	--	2005	no	2	no	yes	ja	yes	yes	2	yes
BioInfo3D	1	10	http://bioinfo3d.cs.tau.ac.il/	yes	no	Sammlung	--	Israel	TAU	2008	2006	no	2	--	--	--	--	--	3	yes
BioProspector	31	0	http://robotics.stanford.edu/~xsliu/BioProspector/	yes	no	--	--	USA	Stanford	2004	2004	Email	2	no	yes	yes	--	yes	14	--	--	yes
BLAST	39	0	http://www.ncbi.nlm.nih.gov/BLAST/	yes	no	--	--	USA	NIH	2009	--	no	2	no	yes	yes	yes	yes	103	yes
BLAST Filter	0	0	http://darwin.nmsu.edu/cgi-bin/blast_filter.cgi	no	500	--	--	USA	NMSU	--	--	--	--	--	--	--	no	no	1	--	--	--
BOMP	36	0	http://www.bioinfo.no/tools/bomp	yes	no	--	--	Norwegen	Bergen Uni	2008	--	no	3	no	no	yes	yes	yes	17	yes
BSDD	33	0	http://iris.physics.iisc.ernet.in/bsdd/	yes	no	Datenbank	v2.0	Indien	IISC	2009	2008	no	2	no	no	yes	yes	yes	0	yes
CARNAC	34	0	http://bioinfo.lifl.fr/carnac	yes	no	--	--	Frankreich	LIFL/USTL	2004	--	no	3	no	yes	yes		yes	8	yes
CARRIE	35	0	http://zlab.bu.edu/CARRIE-web	yes	no	--	--	USA	BU	2007	--	no	2	no	no	yes	yes	yes	7	yes
CaspR	26	0	http://igs-server.cnrs-mrs.fr/Caspr/index.cgi	yes	no	--	--	Frankreich	CNRS	2006	--	Email	2	no	yes	yes	--	no	18	--	yes
CD-Search	34	0	http://www.ncbi.nlm.nih.gov/Structure/cdd/wrpsb.cgi	yes	no	--	--	USA	NIH	--	--	no	2	no	no	yes	yes	yes	158	yes
CE-MC	30	0	http://bioinformatics.albany.edu/~cemc/	yes	no	--	--	USA	Albany Uni	--	2008	Email	2	no	yes	yes	--	yes	18	--	--	yes
CHAOS/DIALIGN WWW Server	30	0	http://dialign.gobics.de/chaos-dialign-submission	yes	no	--	--	Deutschland	GÃ¶ttingen Uni	--	--	Email	2	no	yes	yes	--	yes	11	yes
CHOP	0	0	http://bunsei2.med.u-tokai.ac.jp:8080/~ohtsuka/cds_finding.html	no	ZeitÃ¼berschreitung	--	--	Japan	--	--	--	--	--	--	--	--	no	no	9	--	--	--
CHOP	31	0	http://www.rostlab.org/services/CHOP/	yes	no	--	--	USA	Columbia	2008	--	Email	2	no	yes	yes	--	yes	9	yes
ClusPro	21	0	http://nrc.bu.edu/cluster/	yes	no	--	--	USA	BU	--	--	Email	2	no	no	yes	--	no	15	yes
COLORADO-3D	21	0	http://asia.genesilico.pl/colorado3d/	yes	no	--	--	Polen	IIMCB	2004	2008	yes	2	no	--	yes	--	no	19	yes
CompareProspector	28	0	http://compareprospector.stanford.edu/	yes	no	--	--	USA	Stanford	2004	2005	Email	2	no	yes	yes	--	--	14	--	--	yes
CONFAC	11	0	http://morenolab.whitehead.emory.edu/cgi-bin/confac/login.pl	yes	no	--	--	USA	Emory	--	--	yes	--	--	--	--	--	no	19	yes
ConPred II	30	0	http://bioinfo.si.hirosaki-u.ac.jp/~ConPred2/	yes	no	--	--	Japan	--	2005	--	Email	2	no	yes	yes	--	yes	22	yes
Consensus Server	26	0	http://structure.bu.edu/cgi-bin/consensus/consensus.cgi	yes	no	--	--	USA	BU	--		Email	2	no	no	yes	--	yes	2	yes
Consite	1	6	http://www.phylofoot.org/consite/	yes	no	Sammlung	--	Norwegen	Bergen Uni	--	--	no	2	--	--	--	--	--	48	yes
CRASP	38	0	http://wwwmgs.bionet.nsc.ru/mgs/programs/crasp/	yes	no	--	--	Russland	Russian Academy of Sciences	--	2004	no	2	no	yes	yes	yes	yes	6	yes
CREME	0	0	http://creme.dcode.org/	yes	no	--	--	USA	NIH	--	--	no	--	no	no	no	no	yes	25	yes
CSTminer	35	0	http://www.caspur.it/CSTminer/	yes	no	--	--	Italien	CASPUR	--	--	no	2	no	yes	yes	yes	yes	9	yes
CVTree	0	0	http://cvtree.cbi.pku.edu.cn/	yes	no	--	--	China	Peking Uni	2008	--	no	2	no	yes	yes	no	no	3	yes
CysView	0	0	http://research.i2r.a-star.edu.sg/CysView/	no	Adresse nicht gefunden	--	--	Singapur	A-Star	--		--	--	--	--	--	no	no	3	--	--	--
DEQOR	0	0	http://cluster-1.mpi-cbg.de/Deqor/deqor.html	yes	no	--	--	Deutschland	MPI for CBG	--	2008	no	2	no	yes	yes	no	yes	20	yes
DIALIGN	34	0	http://bibiserv.techfak.uni-bielefeld.de/dialign/	yes	no	--	v2.2.1	Deutschland	Bielefeld Uni	2008	2008	no	3	yes	--	yes	yes	yes	30	yes
DICHROWEB	0	0	http://public-1.cryst.bbk.ac.uk/cdweb/html/	yes	Weiterleitung	--	--	UK	Birkbeck	--		--	--	--	--	--	no	no	68	--	--	yes
DTFAM	6	0	http://research.i2r.a-star.edu.sg/DRAGON/TFAM_v2/index.html	no	Adresse nicht gefunden	--	--	Singapur	A-Star	--	--	--	--	--	--	--	--	no	5	--	--	--
E2G	39	0	http://bibiserv.techfak.uni-bielefeld.de/e2g/	yes	no	--	--	Deutschland	Bielefeld Uni	2009	2009	no	2	no	yes	yes	yes	yes	6	yes
EBI Public Web-Services	23	0	http://www.ebi.ac.uk/services/	yes	no	Index	--	UK	EBI/EMBL	2009	2009	no	3	no	--	--	--	--	7	yes
ECR Browser	36	0	http://ecrbrowser.dcode.org/	yes	no	--	--	USA	Dcode	2008		no	2	no	yes	yes	yes	yes	43	yes
EINemo	26	0	http://igs-server.cnrs-mrs.fr/elnemo/start.html	yes	no	--	--	Frankreich	CNRS	2007	2007	no	2	no	--	yes	--	--	48	--	yes
Electronic PCR	35	0	http://www.ncbi.nlm.nih.gov/sutils/e-pcr	yes	no	--	--	USA	NIH	--	2009	no	2	no	yes	yes	yes	yes	5	yes
ERPIN	40	0	http://tagc.univ-mrs.fr/erpin/	yes	no	--	v4.2.5	Frankreich	Aix-Marseille Unis	2005	--	no	2	no	yes	yes	yes	yes	4	yes
ESLpred	34	0	http://www.imtech.res.in/raghava/eslpred/	yes	no	--	--	Indien	IMTECH	--	2007	no	2	no	no	yes	yes	yes	27	yes
Expression Profiler	19	0	http://www.ebi.ac.uk/expressionprofiler/	yes	no	--	v1.0	UK	EMBL-EBI	2008	--	yes	2	no	--	yes	--	no	26	yes
FAN	8	0	http://umber.sbs.man.ac.uk/cgi-bin/neil/ntfront.pl	no	Weiterleitung; Programm nicht gefunden	--	--	UK	Manchester Uni	--	--	--	--	--	--	--	--	--	0	--	--	--
FATCAT	26	0	http://fatcat.burnham.org/	yes	no	--	--	USA	Burnham	2009	2009	no	2	no	--	yes	--	--	15	yes
FoldMiner and LOCK 2	17	0	http://foldminer.stanford.edu/	yes	no	--	--	USA	Stanford	2007		no	2	yes	--	--	--	no	7	yes
GDAP	0	0	http://www.doe-mbi.ucla.edu/Services/GDAP	yes	no	--	--	USA	UCLA	--	--	no	3	no	yes		no	yes	6	yes
Gene2Oligo	35	0	http://berry.engin.umich.edu/gene2oligo/	yes	no	--	--	USA	U-M	2005	--	no	2	no	no	yes	yes	yes	10	yes
Genotyping - NCBI	38	0	http://www.ncbi.nih.gov/projects/genotyping/formpage.cgi	yes	no	--	--	USA	NIH	--	--	no	2	no	yes	yes	yes	yes	16	yes
GEPAS	1	12	http://www.gepas.org/	yes	no	Sammlung	v.4.0	USA	CIPF	2007	--	no	3	--	--	--	--	--	16	--	yes
GFINDer	0	0	http://www.medinfopoli.polimi.it/GFINDer/	yes	no	--	--	Italien	Polimi	2007	--	no	2	no	yes	yes	no	yes	18	yes
GlycoFragment	38	0	http://www.dkfz.de/spec/projekte/fragments/	yes	no	--	--	Deutschland	DKFZ	--	--	no	2	no	yes	yes	yes	yes	3	yes
GlycoSearchMS	38	0	http://www.dkfz.de/spec/glycosciences.de/sweetdb/ms/	yes	no	--	--	Deutschland	DKFZ	--	--	no	2	no	yes	yes	yes	yes	3	yes
GOAL	25	0	http://microarrays.unife.it/	yes	no	--	--	Italien	Ferrara Uni	2007	--	Email	2	no	yes	yes	--	--	11	yes
GOblet	39	0	http://goblet.molgen.mpg.de/	yes	no	--	--	Deutschland	MPI MolGen	2009	--	no	2	no	yes	yes	yes	yes	20	--	yes
GPCRpred	34	0	http://www.imtech.res.in/raghava/gpcrpred/	yes	no	--	--	Indien	IMTECH	--	2007	no	2	no	no	yes	yes	yes	8	yes
GraphAlign	0	0	http://darwin.nmsu.edu/cgi-bin/graph_align.cgi	no	500	--	--	USA	NMSU	--		--	--	--	--	--	no	no	1	--	--	--
IBM Bioinformatics and Pattern Discovery Group	39	0	http://cbcsrv.watson.ibm.com/Tspd.html	yes	no	--	--	USA	IBM	2008	2008	no	2	no	yes	yes	yes	yes	1	yes
IBM Genome Annotation Page	0	0	http://cbcsrv.watson.ibm.com/Annotations/home.html	yes	no	--	--	USA	IBM	2004	2008	no	1	no	--	--	no	yes	1	yes
Iccare	0	0	http://genopole.toulouse.inra.fr/bioinfo/Iccare/	yes	--	--	--	Frankreich	INRA	--		--	--	--	--		no	no	8	yes
ILM	30	0	http://cic.cs.wustl.edu/RNA/	yes	no	--	--	USA	WUSTL	--	2004	Email	2	no	yes	yes	--	yes	4	yes
IMGT/V-QUEST	40	0	http://imgt.cines.fr/	yes	no	--	v3.2.0	Frankreich	IMGT	2009	--	no	2	no	yes	yes	yes	yes	32	yes
iMolTalk	1	9	http://i.moltalk.org/	yes	no	Sammlung	v3.2	Schweiz	--	--	2007	no	2	--	--	--	--	--	10	yes
iMOT	38	0	http://caps.ncbs.res.in/imot/iMOTserver.html	yes	no	--	--	Indien	NCBS	--	2004	no	2	no	yes	yes	yes	yes	4	--	--	yes
InterWeaver	0	0	http://interweaver.i2r.a-star.edu.sg/	no	Seiten-Ladefehler	--	--	Singapur	A-Star	--	--	--	--	--	--	--	no	no	0	--	--	--
IsoFinder	31	0	http://bioinfo2.ugr.es/IsoF/isofinder.html	yes	no	--	--	Spanien	Granada Uni	2005	2006	no	2	no	no	no	yes	yes	11	yes
ISOTOPICA	1	7	http://coco.protein.osaka-u.ac.jp/isotopica/	yes	no	Sammlung		Japan	Osaka Uni	--	2005	no	2	--	--	--	--	--	3	yes
JPD	0	0	http://trantor.bioc.columbia.edu/SMS/JPD/	no	existiert nicht mehr	--	--	USA	Columbia	--		--	--	--	--	--	no	no	3	--	--	--
KARMA	20	0	http://biryani.med.yale.edu/karma/cgi-bin/mysql/karma.pl	yes	no	--	--	USA	Yale	--	--	Email	2	no	no	yes	--	--	5	--	yes
KCaM	0	0	http://glycan.genome.ad.jp/	yes	--	--	--	Japan	--	--		--	--	--	--	--	no	no	4	--	--	yes
LINKER	0	0	http://astro.temple.edu/~feng/Servers/BioinformaticServers.htm	no	404	--	--	USA	Temple Uni	--		--	--	--	--	--	no	no	0	--	--	--
LOCtarget	33	0	http://www.rostlab.org/services/LOCtarget/	yes	no	--	--	USA	Columbia	2008	--	Email	2	no	no	yes	yes	yes	7	yes
LowComplexity	0	0	http://wwwmgs.bionet.nsc.ru/mgs/programs/low_complexity/	no	Netzwerk-ZeitÃ¼berschreitung	--	--	Russland	NSC Novosibirsk	--		--	--	--	--	--	no	no	4	--	--	--
MAVL/StickWRLD	0	0	http://www.microbial-pathogenesis.org/stickwrld/	no	null	--	--	--	--	--		--	--	--	--	--	no	no	2	--	--	--
MDscan	31	0	http://robotics.stanford.edu/~xsliu/MDscan/	yes	no	--	--	USA	Stanford	2004	2004	Email	2	no	yes	yes	--	yes	14	--	--	yes
Meta-BASIC	11	0	http://basic.bioinfo.pl/	yes	no	Datenbank	--	Polen	--	--	2007	--	2	--	--	--	--	--	26	yes
MITOPRED	33	0	http://bioinformatics.albany.edu/~mitopred/	yes	no	--	--	USA	Albany Uni	--	2008	no	3	no	yes	yes	--	yes	12	--	--	yes
MOLPROBITY	35	0	http://molprobity.biochem.duke.edu/	yes	no	--	v3.15	USA	Duke	--		no	2	no	no	yes	yes	yes	72	--	yes
MONSTER	0	0	http://monster.northwestern.edu/	yes	--	--	--	USA	Northwestern	--		--	--	--	--	--	no	no	4	yes
MotifViz	23	0	http://biowulf.bu.edu/MotifViz/	yes	no	--	--	USA	BU	2004	2008	no	1	no	--	yes	--	no	9	yes
MoViES	26	0	http://ang.cz3.nus.edu.sg/cgi-bin/prog/norm.pl	yes	no	--	--	Singapur	NUS	--	--	Email	2	no	no	yes	--	yes	4	yes
MSCAN	0	0	http://mscan.cgb.ki.se/cgi-bin/MSCAN	no	Netzwerk-ZeitÃ¼berschreitung	--	--	Schweden	Karolinska Institut	--		--	--	--	--	--	no	no	16	--	--	--
MyHits	27	0	http://myhits.isb-sib.ch/	yes	no	--	--	Schweiz	SIB	2008	--	no	2	no	yes	yes	--	--	16	yes
NLProt	0	0	http://cubic.bioc.columbia.edu/services/nlprot/index.html	yes	no	--	--	USA	Columbia	2008		no	3	no	yes	yes	no	yes	2	--	yes
NRPS-PKS	37	0	http://www.nii.res.in/nrps-pks.html	yes	no	--	--	Indien	RES	--	2008	no	1	no	yes	yes	yes	yes	16	yes
Onto-Tools	1	10	http://vortex.cs.wayne.edu/Projects.html	yes	no	Sammlung	--	USA	Wayne	--	2008	--	3	--	--	--	--	--	38	yes
PathBLAST	39	0	http://www.pathblast.org/	yes	no	--	--	USA	Kooperation zwischen 4 Labs	--	--	no	3	no	yes	yes	yes	yes	24	yes
PDA	31	0	http://pda.uab.es/pda2/	yes	no	--	v2.0	Spanien	UAB	--		yes	3	no	yes	yes	--	yes	4	--	yes
PDB2PQR Server	32	0	http://pdb2pqr.sourceforge.net/	yes	no	--	v1.4.0	USA	WUSTL	2007	2009	no	1	yes	--	yes	yes	yes	53	yes
PDBSiteScan	24	0	http://wwwmgs.bionet.nsc.ru/mgs/systems/fastprot/pdbsitescan.html	yes	no	--	--	Russland	NSC Novosibirsk	2006	--	no	2	no	no	yes	--	no	13	yes
PepBuild	23	0	http://www.imtech.res.in/bvs/pepbuild/	yes	no	--	--	Indien	IMTECH	--	2006	no	2	no	no	yes	--	no	0	yes
Phydback2	39	0	http://igs-server.cnrs-mrs.fr/phydbac/	yes	no	--	--	Frankreich	CNRS	2004	2008	no	2	no	yes	yes	yes	yes	6	yes
PlasMapper	33	0	http://wishart.biology.ualberta.ca/PlasMapper/index.html	yes	no	--	v2.0	Kanada	Alberta Uni	2007	2007	no	2	yes	yes	no	yes	yes	2	--	yes
POBO	30	0	http://ekhidna.biocenter.helsinki.fi/pobo	yes	no	--	--	Finnland	Helsinki Uni	2004	--	no	2	no	yes	yes	--	--	9	--	yes
PRED-GPCR	35	0	http://athina.biol.uoa.gr/bioinformatics/PRED-GPCR/	yes	no	--	v1.01	Griechenland	Athen Uni	--	2004	no	2	no	no	yes	yes	yes	8	--	yes
PRED-TMBB	34	0	http://bioinformatics.biol.uoa.gr/PRED-TMBB/	yes	no	--	--	Griechenland	Athen Uni	--	--	no	2	no	no	yes	yes	yes	29	yes
PredictProtein	28	0	http://www.predictprotein.org/	yes	no	--	--	USA	Columbia	2008	--	yes	3	no	yes	yes	--	--	131	yes
PredictRegulon	39	0	http://www.cdfd.org.in/predictregulon/	yes	no	--	--	Indien	CDFD	2004		no	2	no	yes	yes	yes	yes	18	yes
PrediSi	38	0	http://www.predisi.de/	yes	no	--	--	Deutschland	Braunschweig TU	--	2006	no	2	no	yes	yes	yes	yes	12	yes
ProbleLynx	31	0	http://www.pathogenomics.ca/probelynx	yes	no	--	v1.3	Kanada	SFU	--	--	Email	2	no	yes	yes	--	yes	5	yes
PromoSer	34	0	http://biowulf.bu.edu/zlab/PromoSer/	yes	no	--	--	USA	BU	--	2006	no	2	no	no	yes	yes	yes	8	yes
ProMoST	22	0	http://prometheus.brc.mcw.edu/promost/	yes	Adresse nicht gefunden	--	--	USA	MCW	--	2009	no	3	no	no	no	--	--	7	--	--	yes
ProSight PTM	15	0	http://prosightptm2.scs.uiuc.edu/	yes	no	--	v2.0	USA	Illinois	2009	2009	yes	2	--	--	--	--	no	15	yes
PROSPECT-PSPP	13	0	http://csbl.bmb.uga.edu/protein_pipeline	yes	no	--	--	USA	UGA	--	--	yes	2	--	--	--	--	no	1	yes
ProteinDBS	27	0	http://proteindbs.rnet.missouri.edu/	yes	no	Suchmaschine	v2.0	USA	Uni Missouri	2009	2009	no	2	no	no	yes	--	--	4	yes
ProteMiner-SSM	0	0	http://proteminer.csie.ntu.edu.tw/	no	â€žIt worksâ€œ	--	--	Taiwan	NTU	--	2008	--	--	--	--	--	no	no	3	--	--	--
Proteome Analyst	14	0	http://www.cs.ualberta.ca/~bioinfo/PA/	yes	no	--	v3.0	Kanada	Alberta Uni	--	2008	yes	2	--	--	--	--	no	14	yes
PubCrawler	25	0	http://pubcrawler.gen.tcd.ie/	yes	no	--	--	Irland	Trinity College	2008	2008	yes	2	no	yes	yes	--	no	6	--	yes
PupaSuite	0	0	http://pupasuite.bioinfo.cipf.es/	yes	--	--	v2.0	Spanien	CIPF	2007		no	2	no	--	yes	no	yes	18	yes
pvSOAR	0	0	http://pvsoar.bioengr.uic.edu/	no	Netzwerk-ZeitÃ¼berschreitung	--	--	USA	UIC	--		--	--	--	--	--	no	no	9	--	--	--
Qgrid	38	0	http://gibk26.bse.kyutech.ac.jp/jouhou/shandar/netasa/qgrid/	yes	no	--	--	Japan	Kyoto Uni	--	2004	no	2	no	yes	yes	yes	yes	1	--	yes
RDfolder	0	0	http://rna.cbi.pku.edu.cn:1977/rna/index.php	yes	--	--	--	China	Peking Uni	--	--	--	--	--	--	--	no	no	1	--	yes
RECON	39	0	http://wwwmgs.bionet.nsc.ru/mgs/programs/recon/	yes	no	--	--	Russland	NSC Novosibirsk	2005	2006	no	2	no	yes	yes	yes	yes	9	yes
Rescue-ESE	39	0	http://genes.mit.edu/burgelab/rescue-ese/	yes	no	--	--	USA	MIT	2002	2004	no	2	no	yes	yes	yes	yes	49	yes
Riboswitch Finder	31	0	http://riboswitch.bioapps.biozentrum.uni-wuerzburg.de/server.html	yes	no	--	--	Deutschland	WÃ¼rzburg Uni	--	2004	no	2	no	yes	no	yes	yes	12	--	yes
Robetta	31	0	http://robetta.bakerlab.org/	yes	no	--	--	USA	UW	2007	--	Email	2	no	yes	yes	--	yes	43	yes
rVISTA	36	0	http://rvista.dcode.org/	yes	no	--	v2.0	USA	Dcode	2004	--	no	2	no	--	yes	yes	yes	57	yes
SA-Search	37	0	http://bioserv.rpbs.jussieu.fr/cgi-bin/SA-Search	yes	no	--	v1.0	Frankreich	Paris 7	2006	--	no	2	no	yes	yes	yes	yes	7	yes
SBT Interface - dbMHC	38	0	http://www.ncbi.nlm.nih.gov/gv/mhc/sbt.cgi?cmd=main	yes	no	--	--	USA	NIH	2008	--	no	1	no	yes	yes	yes	yes	3	yes
SCit	34	0	http://bioserv.rpbs.jussieu.fr/cgi-bin/SCit	yes	no	--	--	Frankreich	Paris 7	--		no	1	no	yes	yes	yes	yes	6	yes
SDPMOD	31	0	http://proline.bic.nus.edu.sg/sdpmod/	yes	no	--	--	Singapur	NUS	2004	2009	Email	2	no	yes	yes	--	yes	2	yes
SDPpred	38	0	http://math.genebee.msu.ru/~psn/	yes	--	--	--	Russland	MSU	2004		no	1	no	yes	yes	yes	yes	18	--	--	yes
SeqVISTA	23	0	http://zlab.bu.edu/SeqVISTA/	yes	no	--	v1.8.1	USA	BU	--	2005	no	2	yes	--	yes	--	--	1	yes
Sfold	37	0	http://sfold.wadsworth.org/	yes	no	--	v2.0	USA	NYS Department of Health	2009	--	no	3	no	no	yes	yes	yes	41	yes
siDirect	32	0	http://design.rnai.jp/	yes	no	--	--	Japan	Genomics	--	--	no	3	no	no	yes	yes	yes	30	yes
siRNA Selection Server	26	0	http://jura.wi.mit.edu/bioc/siRNA	yes	no	--	--	USA	MIT	2004	--	yes	3	no	yes	yes	--	no	39	yes
SITECON	39	0	http://wwwmgs.bionet.nsc.ru/mgs/programs/sitecon/	yes	no	--	--	Russland	NSC Novosibirsk	--	--	no	3	no	yes	yes	yes	yes	0	yes
SledgeHMMER	0	0	http://sledgehmmer.sdsc.edu/	no	Adresse nicht gefunden	--	--	USA	SDSC	--		--	--	--	--	--	no	no	4	--	--	--
SNPbox	29	0	http://www.snpbox.org/	yes	no	--	--	Belgien	Antwerpen Uni	2006	2007	no	2	no	no	yes	--	yes	4	yes
STRIDE	34	0	http://webclu.bio.wzw.tum.de/stride/	yes	no	--	--	Deutschland	MÃ¼nchen TU	--	2008	no	2	no	no	yes	yes	yes	12	yes
SuperPose	36	0	http://wishart.biology.ualberta.ca/SuperPose/	yes	no	--	v1.0	Kanada	Alberta Uni	--		--	2	no	yes	yes	yes	yes	21	yes
T-COFFEE	1	9	http://www.tcoffee.org/	yes	no	Sammlung	--	Schweiz	SIB	--	--	no	2	--	--	--	--	--	33	--	yes
The European BioBioinformatics Institute (EBI)	1	11	http://www.ebi.ac.uk/	yes	no	Sammlung	--	UK	EMBL-EBI	2009	2009	--	3	--	--	--	--	--	7	yes
TROD	22	0	http://www.cellbio.unige.ch/RNAi.html	yes	no	--	v1.1.2	Schweiz	Uni Genf	--	--	no	2	no	no	no	--	yes	3	yes
VISTA	1	9	http://genome.lbl.gov/vista/index.shtml	yes	no	Sammlung	--	USA	LBL	--	--	no	2	--	--	--	--	--	119	--	yes
WAViS	38	0	http://wavis.img.cas.cz/	yes	no	--	--	Tschechien	Academy of Sciences of the Czech Republic	--	2003	no	2	no	yes	yes	yes	yes	2	yes
Web Weeder	18	0	http://www.pesolelab.it/	yes	no	--	v1.3	Italien	Uni Bari	--	--	Email	1	no	no	yes	--	no	64	yes
WebInterViewer	24	0	http://interviewer.inha.ac.kr/	yes	no	--	--	SÃ¼dkorea	Inha Uni	2005	--	no	2	yes	yes	yes	--	--	2	yes
Wurst	25	0	http://www.zbh.uni-hamburg.de/wurst/	yes	no	--	--	Deutschland	Uni Hamburg	2009	--	Email	3	no	no	yes	--	yes	9	yes

## Sheet: NAR-WebServerIssue2005
Name	LT-Score (single service)	LT-Score (collection)	URL (redirect or from Links Directory)	Service Reachable	Error message	Type	Version	Country	Institution	Updated (Website)	Updated (Mozilla)	Login/Registration	Usability	Download required	Example Data	Documentation/Help	Server operational	Fair Testing Possibility	Citations in PMC	Orig URL functional	Redirect/Link	Search Engine
AISMIG	34	0	http://www.dkfz-heidelberg.de/spec/aismig	yes	no	--	--	Deutschland	DKFZ	--	--	no	2	no	no	yes	yes	yes	2	yes
AMOD	0	0	http://www.secretomes.umn.edu/AMOD/	no	Server is down.	--	--	USA	UMN	--	--	--	--	--	--	--	no	no	7	--	--	--
AntiHunter 2.0	0	0	http://bioinfo.crs4.it/AH2.0/	no	Keine Verbindung zu Server.	--	--	Italien	CRS4	--	--	--	--	--	--	--	no	no	2	--	--	--
ARGO	0	0	http://wwwmgs.bionet.nsc.ru/mgs/programs/argo/	no	Seiten-Ladefehler	--	--	Russland	ICG	2006	2006	no	2	no	yes	yes	no	yes	0	--	--	--
ArrayXPath	24	0	http://www.snubi.org/software/ArrayXPath/	yes	no	--	--	SÃ¼dkorea	SNU	2005	--	no	1	no	yes	yes	--	no	13	yes
ARTS	38	0	http://andromeda.gsf.de/arts	yes	no	--	--	Deutschland	Helmholtz Zentrum MÃ¼nchen	--	--	no	2	no	yes	yes	yes	yes	1	yes
AS2TS	31	0	http://as2ts.llnl.gov/AS2TS/as2ts.html	yes	no	--	--	USA	LLNL	2009		Email	2	no	yes	yes	--	yes	5	--	yes
ASePCR	40	0	http://genome.ewha.ac.kr/ASePCR/	yes	no	--	v0.6	SÃ¼dkorea	EWHA	2005	2005	no	2	no	yes	yes	yes	yes	2	yes
ASIAN	0	0	http://eureka.ims.u-tokyo.ac.jp/asian/	no	Netzwerk-ZeitÃ¼berschreitung	--	--	Japan	Tokio Uni	--		--	--	--	--	--	no	no	3	--	--	--
Asselmbly PCR Oligo Maker	34	0	http://publish.yorku.ca/~pjohnson/AssemblyPCRoligomaker.html	yes	no	--	--	Kanada	York Uni	--	--	no	2	no	no	yes	yes	yes	2	yes
AthaMap	40	0	http://www.athamap.de/	yes	no	--	--	Deutschland	Braunschweig TU	2008	--	no	3	no	yes	yes	yes	yes	9	yes
AUGUSTUS	38	0	http://augustus.gobics.de/submission	yes	no	--	--	Deutschland	GÃ¶ttingen Uni	--	--	no	2	no	yes	yes	yes	yes	7	yes
AutoSNPdb	28	0	http://autosnpdb.qfab.org.au/	yes	no	Datenbank	v1.3	Australien	UQ	2008	--	no	3	no	no	yes	--	--	5	--	--	yes
Babelomics	1	12	http://www.babelomics.org/	yes	no	Sammlung	v3.2	USA	CIPF	2009	--	--	3	no	--	--	--	--	46	yes
BASys	28	0	http://wishart.biology.ualberta.ca/basys/	yes	no	--	v1.0	Kanada	Alberta Uni	--	--	Email	2	no	yes	yes	--	--	16	yes
BhairPred	23	0	http://www.imtech.res.in/raghava/bhairpred/	yes	no	--	--	Indien	IMTECH	--	2007	Email	2	no	no	yes	--	--	3	yes
Bioverse	35	0	http://bioverse.compbio.washington.edu/	yes	no	--	v2.3	USA	UW	--	--	no	2	no	no	yes	yes	yes	2	yes
BRIGEP	0	0	https://www.cebitec.uni-bielefeld.de/groups/brf/software/brigep/	no	UngÃ¼ltiges Sicherheitszertifikat	--	--	Deutschland	Bielefeld Uni	--		--	--	--	--	--	no	--	4	--	--	--
BROP	1	8	http://brop.org/	yes	no	Sammlung	--	USA	Forsyth Institute	2007	--	--	3	no	--	--	--	--	1	yes
CAMPO	36	0	http://schubert.bio.uniroma1.it/CAMPO/index.html	yes	no	--	--	Italien	La Sapienza	--	2006	no	3	no	yes	yes	yes	yes	1	yes
CBS DAS protein viewer	39	0	http://www.cbs.dtu.dk/cgi-bin/das	yes	no	--	--	DÃ¤nemark	Center for Biological Sequence Analysis	--	--	no	3	no	yes	yes	yes	yes	8	yes
CCT	8	0	http://sourceforge.net/projects/orb-cct	yes	no	--	--	--	--	--	--	--	--	yes	--	--	--	--	0	yes
CEP	30	0	http://bioinfo.ernet.in/cep.htm	yes	no	--	--	Indien	Pune Uni	--	--	Email	2	no	yes	yes	--	yes	15	yes
CHAOS/DIALIGN WWW server	38	0	http://dialign.gobics.de/chaos-dialign-submission	yes	no	--	--	Deutschland	GÃ¶ttingen Uni	--	--	no	2	no	yes	yes	yes	yes	1	yes
CHC_FIND	30	0	http://schubert.bio.uniroma1.it/CHC_FIND/index.html	yes	no	--	--	Italien	La Sapienza	--	2006	no	3	no	yes	yes	--	yes	1	yes
CisMols	22	0	http://cismols.cchmc.org/	yes	no	--	v3.1.2.1963	USA	CCHMC	2006	--	no	2	no	--	yes	--	no	5	yes
CONREAL	35	0	http://conreal.niob.knaw.nl/	yes	no	--	--	Niederlande	KNAW	--	2006	no	2	no	yes	yes	yes	yes	6	yes
ConSurf	31	0	http://consurf.tau.ac.il/	yes	no	--	v3.0	Israel	TAU	--	2009	Email	2	no	yes	yes	--	yes	92	yes
DCODE.ORG	1	9	http://www.dcode.org/	yes	no	Sammlung	--	USA	Dcode	--	--	--	2	no	--	--	--	--	9	yes
DeNovoID	27	0	http://proteomics.mcw.edu/denovoid/	yes	no	--	--	USA	UW	2009	--	Email	2	no	no	yes	--	yes	0	yes
DIAL	38	0	http://caps.ncbs.res.in/DIAL/home.html	yes	no	--	--	Indien	NCBS	--	2005	no	2	no	yes	yes	yes	yes	2	--	--	yes
DiANNA	39	0	http://bioinformatics.bc.edu/clotelab/DiANNA/	yes	no	--	v1.1	USA	Boston College	--	2008	no	2	no	yes	yes	yes	yes	8	yes
DINAMelt	23	0	http://www.bioinfo.rpi.edu/applications/hybrid/	yes	no	--	--	USA	RPI	--	2008	no	2	no	no	yes	--	no	56	yes
dnaMATE	35	0	http://dna.bio.puc.cl/cardex/servers/dnaMATE/index.html	yes	no	--	v1.0	Chile	PUC	--	2005	no	2	no	no	yes	yes	yes	5	--	yes
dsCheck	35	0	http://dscheck.rnai.jp/	yes	no	--	--	Japan	--	--	2005	no	3	no	yes	yes	yes	yes	8	yes
E-RNAi	40	0	http://e-rnai.dkfz.de/	yes	no	--	v2.0	Deutschland	DKFZ	--	--	no	3	no	yes	yes	yes	yes	11	yes
EBI Tools	1	7	http://www.ebi.ac.uk/Tools/webservices/	yes	no	Sammlung	--	UK	EBI	--	--	--	3	--	--	--	--	--	17	yes
Eclair	0	0	http://eclair.btk.fi/	no	503	--	--	Finnland	Turku Centre for Biotechnology	--	--	--	--	--	--	--	no	no	1	--	--	--
enoLOGOS	36	0	http://biodev.hgen.pitt.edu/enologos/	yes	no	--	v1.0	USA	Pittsburgh Uni	--	--	no	2	no	yes	yes	yes	yes	21	yes
EVAcon	0	0	http://www.pdg.cnb.uam.es/eva/con/index.html	yes	no	--	v2.0	Spanien	UAM	2004	2006	no	1	no	no	no	no	--	2	yes
FeatureExtract	40	0	http://www.cbs.dtu.dk/services/FeatureExtract/	yes	no	--	v1.2	DÃ¤nemark	Center for Biological Sequence Analysis	2008	--	no	2	no	yes	yes	yes	yes	5	yes
FF - Fragment Finder	32	0	http://cluster.physics.iisc.ernet.in/ff/	yes	no	--	--	Indien	Indian Institute of Science	2008		no	2	no	no	yes	yes	yes	3	yes
FFAS03	0	0	http://ffas.burnham.org/	yes	no	--	--	USA	Burnham	2007	--	no	2	no	yes	yes	no	yes	54	yes
FOLDALIGN	40	0	http://foldalign.kvl.dk/	yes	no	--	v2.1.0	DÃ¤nemark	Kopenhagen Uni	2005	2007	no	2	no	yes	yes	yes	yes	9	--	yes
FoldX	20	0	http://foldx.embl.de/	yes	no	--	v3.0 Beta 3	Spanien	CRG	--	--	yes	2	--	--	yes	--	--	24	yes
Footer	33	0	http://biodev.hgen.pitt.edu/Footer/	yes	no	--	v2.0	USA	Pittsburgh Uni	--	--	no	2	no	yes	yes	--	yes	4	yes
Fragnostic	35	0	http://ffas.burnham.org/Fragnostic	yes	no	--	--	USA	Burnham	--	--	--	2	no	yes	yes	yes	yes	3	--	yes
GBA Server	0	0	http://gba.cbi.pku.edu.cn/	no	Netzwerk-ZeitÃ¼berschreitung	--	--	China	Peking Uni	--		--	--	--	--	--	no	no	4	--	--	--
GEMS	26	0	http://genomics10.bu.edu/terrence/gems/	yes	no	--	--	USA	BU	--	2008	Email	1	no	yes	yes	--	yes	5	yes
GeneMark	1	9	http://opal.biology.gatech.edu/GeneMark/	yes	no	Sammlung	--	USA	Georgia Tech	--	2009	--	2	no	--	--	--	--	20	yes
GenePath	0	0	http://www.genepath.org/genepath2	yes	no	--	--	USA	--	--	--	--	1	no	yes	no	no	no	1	yes
GeneSeeker	0	0	http://www.cmbi.ru.nl/GeneSeeker/	yes	no	--	--	Niederlande	RU	--		--	--	--	--	--	no	no	14	yes
GENSTYLE	0	0	http://genstyle.imed.jussieu.fr/	no	Netzwerk-ZeitÃ¼berschreitung	--	--	Frankreich	--	--		--	--	--	--	--	no	no	4	--	--	--
GEPAS	1	11	http://www.gepas.org/	yes	no	Sammlung	v.4.0	USA	CIPF	--	2007	--	3	no	--	--	--	--	25	yes
GFINDer	26	0	http://www.medinfopoli.polimi.it/GFINDer/	yes	no	--	--	Italien	Polimi	--	2007	no	1	no	yes	yes	--	no	10	yes
Glyprot	39	0	http://www.glycosciences.de/glyprot/	yes	no	--	--	Deutschland	DKFZ	2009	--	no	2	no	yes	yes	yes	yes	7	yes
GoPubMed	26	0	http://www.gopubmed.org/	yes	no	Suchmaschine	--	Deutschland	Dresden TU	2009	--	--	3	no	--	--	yes	yes	31	yes
GPCRsclass	26	0	http://www.imtech.res.in/raghava/gpcrsclass/	yes	no	--	--	Indien	IMTECH	2004		no	2	no	no	yes	--	--	3	yes
GPS	0	0	http://973-proteinweb.ustc.edu.cn/gps/gps_web/predict.php	no	404	--	--	China	USTC	--	--	--	--	--	--	--	no	no	20	--	--	--
GraBCas	0	0	http://wwwalt.med-rz.uniklinik-saarland.de/med_fak/humangenetik/software/index.html	no	404	--	--	Deutschland	Uni des Saarlandes	--	--	--	--	--	--	--	no	no	5	--	--	--
GRIFFIN	38	0	http://griffin.cbrc.jp/	yes	no	--	--	Japan	CBRC	--	2005	no	2	no	yes	yes	yes	yes	5	yes
H++	38	0	http://biophysics.cs.vt.edu/H++	yes	no	--	--	USA	Virginia Tech	--	--	no	2	no	yes	yes	yes	yes	13	yes
HHpred	0	0	http://protevo.eb.tuebingen.mpg.de/hhpred	no	404	--	--	Deutschland	MPI Entwicklungsbiologie	--		--	--	--	--	--	no	no	92	--	--	--
I-Mutant2.0	36	0	http://gpcr2.biocomp.unibo.it/cgi/predictors/I-Mutant2.0/I-Mutant2.0.cgi	yes	no	--	v2.0	Italien	Bologna Uni	2006	--	no	2	no	no	yes	yes	yes	10	yes
I2I-SiteEngine	39	0	http://bioinfo3d.cs.tau.ac.il/I2I-SiteEngine/	yes	no	--	v1.2beta	Israel	TAU	--	2008	no	2	no	yes	yes	yes	yes	7	--	yes
ICGBnet Protein Tools	1	4	http://www.icgeb.org/protein/	yes	no	Sammlung	--	Italien	ICGEB Trieste	--	--	--	--	--	--	--	--	--	2	yes
InterProScan	36	0	http://www.ebi.ac.uk/InterProScan/	yes	no	--	v4.4	UK	EBI	--	--	no	3	no	no	yes	yes	yes	98	yes
ISTECH SNPAnalyzer	0	0	http://www.istech21.com/en/life/life232_overview.asp	yes	404	--	--	SÃ¼dkorea	Istech Corp.	--	--	--	--	--	--	--	no	no	5	--	--	yes
JCat	35	0	http://www.jcat.de/	yes	no	--	--	Deutschland	Braunschweig TU	2008	--	no	2	no	no	yes	yes	yes	12	--	yes
KinasePhos	38	0	http://kinasephos.mbc.nctu.edu.tw/	yes	nein	--	--	Taiwan	NCTU	--		no	2	no	yes	yes	yes	yes	20	yes
Kinefold	31	0	http://kinefold.u-strasbg.fr/	yes	no	--	--	Frankreich	Curie	--	2009	no	2	no	no	yes	yes	yes	8	yes
LitMiner	38	0	http://andromeda.gsf.de/litminer	yes	no	--	--	Deutschland	Helmholtz MÃ¼nchen	--	--	no	2	no	yes	yes	yes	yes	7	yes
LOCSVMpsi	0	0	http://bioinformatics.ustc.edu.cn/LOCSVMPSI/LOCSVMPSI.php	no	Netzwerk-ZeitÃ¼berschreitung	--	--	China	USTC	--		--	--	--	--	--	no	no	15	--	--	--
MaM	21	0	http://compbio.cs.sfu.ca/MAM.htm	yes	no	--	v1.4.2	Kanada	SFU	--	2009	no	2	yes	--	yes	--	no	1	yes
MAVL/StickWRLD	10	0	http://www.microbial-pathogenesis.org/stickwrld/	yes	no	--	--	USA	Ohio State Uni	--	--	--	--	--	--	--	--	--	1	--	--	yes
MEDock	26	0	http://medock.csie.ntu.edu.tw/	yes	no	--	--	Taiwan	NTU		2008	Email	2	no	yes	yes	--	no	5	yes
Metabolic PathFinding	0	0	http://www.scmbb.ulb.ac.be/pathfinding/	yes	no	--	--	Belgien	ULB		2005	--	2	--	--	yes	no	no	4	yes
MICheck	21	0	http://www.genoscope.cns.fr/agc/tools/micheck/	yes	no	--	--	Frankreich	CNS/GÃ©noscope	--	--	Email	2	no	no	yes	--	no	6	yes
MicroInspector	0	0	http://mirna.imbb.forth.gr/microinspector/	yes	Umleitung auf nicht funktionierenden Mirror	--	--	Griechenland/Bulgarien	FORTH/Uni Plovdiv	--	2009	--	--	--	--	--	no	no	16	--	yes
MIDAW	0	0	http://muscle.cribi.unipd.it:2701/	no	Seiten-Ladefehler	--	--	Italien	Padova Uni	--	--	--	--	--	--	--	no	no	17	--	--	--
MINER	0	0	http://www.pmap.csupomona.edu/MINER/	no	Netzwerk-ZeitÃ¼berschreitung	--	--	USA	Cal Poly Pomona	--	--	--	--	--	--	--	no	no	4	--	--	--
miRU	0	0	http://bioinfo3.noble.org/miRU.htm	yes	no	--	--	USA	Noble Foundation	--	--	--	--	--	--	--	no	no	21	--	--	yes
MLST	39	0	http://www.mlst.net/	yes	no	--	--	UK	Imperial College London	2008	--	no	2	no	yes	yes	yes	yes	8	yes
MovieMaker	35	0	http://wishart.biology.ualberta.ca/moviemaker/	yes	no	--	v1.0	Kanada	Alberta Uni	--	--	no	2	no	no	yes	yes	yes	4	yes
MRS	35	0	http://mrs.cmbi.ru.nl/	yes	no	Suchmaschine	--	Niederlande	RU	--	--	no	3	no	no	yes	yes	yes	1	yes
MULTIPRED	0	0	http://antigen.i2r.a-star.edu.sg/multipred/	no	Netzwerk-ZeitÃ¼berschreitung	--	--	Singapur	--	--		--	--	--	--	--	no	no	18	--	--	--
MuPlex	31	0	http://genomics14.bu.edu:8080/MuPlex/MuPlex.html	yes	no	--	v2.2	USA	BU	--	2009	Email	2	no	yes	yes	--	yes	9	yes
MutDB	35	0	http://www.mutdb.org/	yes	no	Datenbank	--	USA	Indiana Uni	--	2009	no	3	no	--	yes	yes	yes	9	yes
nxSNPAnalyzer	38	0	http://snpanalyzer.utmem.edu/	yes	no	--	--	USA	Tennessee Uni Med	--	2005	no	2	no	yes	yes	yes	yes	6	yes
OligoWiz	26	0	http://www.cbs.dtu.dk/services/OligoWiz2/	yes	no	--	v2.1.3	DÃ¤nemark	CBS	2008	--	no	2	yes	yes	yes	--	no	18	yes
One-Block CYRCA	35	0	http://bioinformatics.weizmann.ac.il/~milana/OneCYRCA/	yes	no	--	--	Israel	Weizmann	2006	2005	no	2	no	--	yes	yes	yes	2	yes
Onto-Tools	1	10	http://vortex.cs.wayne.edu/Projects.html	yes	no	Sammlung	--	USA	Wayne	--	2009	--	3	no	--	--	--	--	30	yes
OrfPredictor	0	0	https://fungalgenome.concordia.ca/tools/OrfPredictor.html	yes	no	--	--	Kanada	--	--		--	--	--	--	--	no	no	11	--	--	yes
P-Match	7	0	http://www.gene-regulation.com/cgi-bin/pub/programs/pmatch/bin/p-match.cgi	yes	no	--	--	Deutschland	--	--	--	yes	--	--	--	--	--	no	16	yes
ParAlign	36	0	http://www.paralign.org/	yes	no	--	v5.0	Norwegen	--	2009	--	no	3	no	no	yes	yes	yes	8	yes
PAT	1	11	http://pat.cbs.cnrs.fr/	yes	no	Sammlung	3	Frankreich	CBS	2005	2005	no	2	no	yes	yes	yes	yes	5	yes
PatchDock	23	0	http://bioinfo3d.cs.tau.ac.il/PatchDock/	yes	no	--	v1.3beta	Israel	TAU	--	2008	Email	2	no	--	--	--	yes	16	--	yes
Pathway Explorer	21	0	https://pathwayexplorer.genome.tugraz.at/	yes	no	--	--	Ã–sterreich	Graz TU	2007	--	--	2	no	--	yes	--	no	21	yes
PatMatch	39	0	http://www.arabidopsis.org/cgi-bin/patmatch/nph-patmatch.pl	yes	no	--	v1.1	USA	Ohio State Uni	--	--	no	2	no	yes	yes	yes	yes	9	--	--	yes
PCE	0	0	http://bioserv.rpbs.jussieu.fr/Help/PCE.html	yes	no	--	--	Frankreich	Paris 7	--	2005	no	1	no	yes	yes	no	no	8	yes
Pcleavage	34	0	http://www.imtech.res.in/raghava/pcleavage/	yes	no	--	--	Indien	IMTech	--	2005	no	2	no	no	yes	yes	yes	2	yes
pdbFun	28	0	http://pdbfun.uniroma2.it/	yes	no	Datenbank	--	Italien	Sapienza	--	2008	no	2	no	--	yes	--	yes	12	yes
PEPVAC	30	0	http://immunax.dfci.harvard.edu/PEPVAC/	yes	no	--	--	USA	Harvard	--	2008	Email	2	no	yes	yes	--	yes	4	yes
PhyloDome	35	0	http://mendel.imp.univie.ac.at/PhyloDome/	yes	no	--	--	Ã–sterreich	Wien Uni	--	2008	no	2	no	yes	yes	yes	yes	1	yes
PHYML	27	0	http://atgc.lirmm.fr/phyml/	yes	no	--	--	Frankreich	LIRMM	--	2007	Email	2	no	yes	yes	--	--	101	yes
PISCES	24	0	http://dunbrack.fccc.edu/pisces/	yes	no	--	--	USA	FCCC	2004	--	Email	2	no	--	yes	--	--	17	yes
POCO	39	0	http://ekhidna.biocenter.helsinki.fi/poco/	yes	Weiterleitung an: http://ekhidna.biocenter.helsinki.fi/poxo/poco/	--	--	Finnland	Helsinki Uni	2005	--	no	2	no	yes	yes	yes	yes	4	--	yes
POPSCOMP	0	0	http://ibivu.cs.vu.nl/programs/popscompwww/	yes	no	--	--	Niederlande	Amsterdam Uni	2009	--	no	2	no	yes	yes	no	yes	3	yes
POWER	39	0	http://power.nhri.org.tw/	yes	no	--	--	Taiwan	NHRI	2005	2008	no	2	no	yes	yes	yes	yes	2	yes
PPG	36	0	http://bioserv.rpbs.jussieu.fr/cgi-bin/PPG	yes	no	--	v1.21	Frankreich	Paris 7	2007	--	no	2	no	no	yes	yes	yes	2	yes
PRALINE	35	0	http://ibivu.cs.vu.nl/programs/pralinewww/	yes	no	--	--	Niederlande	Amsterdam Uni	2009	--	no	2	no	no	yes	yes	yes	14	yes
PredBALB/c	0	0	http://antigen.i2r.a-star.edu.sg/predBalbc/	no	Netzwerk-ZeitÃ¼berschreitung	--	--	Singapur	A-Star	--		--	--	--	--	--	no	no	8	--	--	--
PriFi	39	0	http://cgi-www.daimi.au.dk/cgi-chili/PriFi/main	yes	no	--	--	DÃ¤nemark	Aarhus Uni	2005	--	no	2	no	yes	yes	yes	yes	12	yes
PRISM	39	0	http://gordion.hpc.eng.ku.edu.tr/prism/	yes	no	--	v2.0	TÃ¼rkei	Koc University	--	--	no	2	no	yes	yes	yes	yes	14	yes
PRODOC	34	0	http://hodgkin.mbu.iisc.ernet.in/~prodoc/	yes	no	--	--	Indien	IISC	--	2005	no	2	no	no	yes	yes	yes	1	yes
ProFunc	35	0	http://www.ebi.ac.uk/thornton-srv/databases/ProFunc/	yes	no	--	--	UK	EBI	--	2005	no	2	no	yes	yes	yes	yes	53	yes
Projector 2	28	0	http://molgen.biol.rug.nl/websoftware/projector2/	yes	no	--	--	Niederlande	Groningen Uni	--	--	no	3	no	yes	yes	--	no	10	yes
PromoterPlot	18	0	http://promoterplot.fmi.ch/	yes	Proxy-Error	--	v2.0	Schweiz	FMI	--	--	yes	2	no	--	yes	--	no	2	--	yes
ProTarget	0	0	http://www.protarget.cs.huji.ac.il/index.php	no	Seiten-Ladefehler	--	--	Israel	HUJI	--	--	--	--	--	--	--	no	no	0	--	--	--
ProTeus	40	0	http://www.proteus.cs.huji.ac.il/index.php	yes	no	--	--	Israel	HUJI	2009	--	no	3	no	yes	yes	yes	yes	0	yes
Protinfo	1	9	http://protinfo.compbio.washington.edu/	yes	no	Sammlung	--	USA	UW	--	--	--	2	no	--	--	--	--	10	yes
PubFinder	21	0	http://www.glycosciences.de/tools/PubFinder/	yes	no	--	--	Deutschland	DKFZ	2004	--	yes	2	no	no	yes	--	no	8	yes
PupasView	10	0	http://www.pupasnp.org	yes	no	--	--	Spanien	CNIO	--	--	--	--	--	--	--	--	--	7	--	--	yes
QuasiMotiFinder	35	0	http://quasimotifinder.tau.ac.il/	yes	no	--	v4	Israel	TAU	--	2008	no	2	no	no	yes	yes	yes	8	yes
RACE	20	0	http://race.unil.ch/	yes	no	--	--	Schweiz	Lausanne Uni	--	--	yes	3	no	--	yes	--	--	19	yes
REPPER	0	0	http://protevo.eb.tuebingen.mpg.de/repper	yes	no	--	--	Deutschland	MPI Entwicklungsbiologie	--	--	--	--	--	--	--	no	no	11	--	--	yes
RibEx	38	0	http://www.ibt.unam.mx/biocomputo/RibEx.html	yes	no	--	--	Mexiko	UNAM	--	--	no	2	no	yes	yes	yes	yes	18	yes
RNALOSS	27	0	http://bioinformatics.bc.edu/clotelab/RNALOSS/	yes	no	--	--	USA	Boston College	--	2005	Email	2	no	yes	yes	--	yes	2	yes
RPBS	1	9	http://bioserv.rpbs.jussieu.fr/	yes	no	Sammlung	--	Frankreich	Paris 7	--	2009	--	2	no	--	--	--	--	4	yes
SCANMOT	38	0	http://caps.ncbs.res.in/scanmot/scanmot.html	yes	no	--	--	Indien	NCBS	--	2005	no	2	no	yes	yes	yes	yes	6	--	--	yes
SCMD	35	0	http://scmd.gi.k.u-tokyo.ac.jp/	yes	no	Datenbank	--	Japan	Tokio Uni	--	--	no	2	no	yes	yes	yes	yes	2	yes
Scooby-Domain	39	0	http://ibivu.cs.vu.nl/programs/scoobywww/	yes	no	--	--	Niederlande	Amsterdam Uni	2009	--	no	2	no	yes	yes	yes	yes	1	yes
SCR_FIND	36	0	http://schubert.bio.uniroma1.it/SCR_FIND/	yes	no	--	--	Italien	Sapienza	--	2006	no	3	no	yes	yes	yes	yes	2	yes
SCRATCH	1	10	http://www.igb.uci.edu/servers/psss.html	yes	no	Sammlung	--	USA	Uni of California at Irvine	2008	--	--	2	no	--	--	--	--	44	yes
SEARCHGTr	38	0	http://www.nii.res.in/searchgtr.html	yes	no	--	--	Indien	NII/RES	--	2005	no	2	no	yes	yes	yes	yes	3	yes
Servers at University College London	1	9	http://bioinf.cs.ucl.ac.uk/software.html	yes	no	Sammlung	--	UK	University College London	--	2008	--	2	no	--	--	--	--	68	yes
Services from Zhou Laboratory	1	10	http://theory.med.buffalo.edu/	yes	Weiterleitung an: http://sparks.informatics.iupui.edu/	Sammlung	--	USA	Uni Indiana	2007	--	--	2	--	--	--	--	--	1	yes
SiteEngine	36	0	http://bioinfo3d.cs.tau.ac.il/SiteEngine/	yes	no	--	v1.0beta	Israel	TAU	--	2008	no	2	no	yes	yes	yes	yes	7	--	yes
snoGPS	35	0	http://lowelab.ucsc.edu/snoGPS/	yes	no	--	v1.0	USA	UC Santa Cruz	--	2005	no	2	no	no	yes	yes	yes	13	yes
snoscan	39	0	http://lowelab.ucsc.edu/snoscan/	yes	no	--	v1.0	USA	UC Santa Cruz	--	--	no	2	no	yes	yes	yes	yes	13	yes
SNP Cutter	27	0	http://bioinfo.bsd.uchicago.edu/SNP_cutter.htm	yes	no	--	--	USA	Chicago Uni	--	2009	Email	2	no	yes	yes	--	yes	5	yes
SOP3v2	0	0	http://imgen.ccbb.pitt.edu/sop3v2/	no	Server is down.	--	--	USA	Pittsburgh Uni	--	2008	--	--	--	--	--	no	no	0	--	--	--
SPACE	1	10	http://ligin.weizmann.ac.il/space/	yes	no	Sammlung	--	Israel	Weizmann	2007	2007	--	2	no	--	--	--	--	7	yes
Sride	30	0	http://sride.enzim.hu/	yes	no	--	--	Ungarn	Institute of Enzymology	--	--	no	2	no	no	no	yes	yes	1	yes
STING Millenium	0	0	http://trantor.bioc.columbia.edu/SMS/	no	Service existiert nicht mehr.	--	--	USA	Columbia	--	2008	--	--	--	--	--	no	no	2	--	--	--
Stitchprofiles.uio.no	38	0	http://stitchprofiles.uio.no/	yes	no	--	--	Norwegen	Uni Oslo	--	--	no	2	no	yes	yes	yes	yes	2	yes
SVC	29	0	http://svc.molgen.mpg.de/	yes	no	--	--	Deutschland	MPI Molekulare Genetik	--	--	no	2	no	yes	yes	--	yes	0	yes
SymmDock	31	0	http://bioinfo3d.cs.tau.ac.il/SymmDock/	yes	no	--	v1.0beta	Israel	TAU	--	2006	Email	2	no	yes	yes	--	yes	16	--	yes
SynoR	39	0	http://synor.dcode.org/	yes	no	--	--	USA	Dcode	--	--	no	3	no	yes	yes	yes	yes	5	yes
T-profiler	30	0	http://www.t-profiler.org/	yes	no	--	--	USA	Columbia	2005	--	no	2	no	yes	yes	--	--	26	yes
T-Reg Comparator	24	0	http://treg.molgen.mpg.de/	yes	no	--	--	Deutschland	MPI Molekulare Genetik	--	--	no	2	no	yes	yes	--	no	11	yes
T-STAG	0	0	http://tstag.molgen.mpg.de/	yes	no	--	--	Deutschland	MPI Molekulare Genetik	--	--	no	2	no	no	no	no	yes	4	yes
TargetIdentifier	0	0	https://fungalgenome.concordia.ca/tools/TargetIdentifier.html	yes	no	--	--	Kanada	--	--	--	--	--	--	--	--	no	no	7	--	--	yes
TMB-Hunt	0	0	http://www.bioinformatics.leeds.ac.uk/betaBarrel/	yes	no	--	--	UK	Leeds Uni	--	--	--	--	--	--	--	no	no	9	--	--	yes
TMBETA-NET	35	0	http://psfs.cbrc.jp/tmbeta-net/	yes	no	--	--	Japan	CBRC	--	2004	no	2	no	yes	yes	yes	yes	4	yes
TOUCAN 2	17	0	http://www.esat.kuleuven.ac.be/~saerts/software/toucan.php	yes	no	--	v3.0.2	Belgien	Leuven KU	--	--	yes	1	yes	no	yes	--	no	24	yes
TRAMPLE	28	0	http://gpcr.biocomp.unibo.it/biodec/	yes	no	Datenbank	v1.4	Italien	Bologna Uni	--	--	yes	3	no	yes	yes	--	--	1	yes
tRNAscan-SE	35	0	http://lowelab.ucsc.edu/tRNAscan-SE/	yes	no	--	v1.21	USA	UC Santa Cruz	--	2008	no	2	no	no	yes	yes	yes	13	yes
VAMPIRE	20	0	http://genome.ucsd.edu/VAMPIRE/	yes	no	--	--	USA	UC San Diego	2005	2005	no	1	yes	--	yes	--	no	19	yes
VisANT	40	0	http://visant.bu.edu/	yes	no	--	v3.62	USA	BU	2009	2008	no	2	no	yes	yes	yes	yes	26	yes
WebGestalt	21	0	http://genereg.ornl.gov/webgestalt/	yes	no	--	--	USA	Vanderbilt University	2007	--	yes	2	no	--	yes	--	no	72	yes
WebMAM	30	0	http://atgc.lirmm.fr/mam/	yes	no	--	--	Frankreich	Laboratoire dâ€˜Informatique de Robotique et de MicroÃ©lectronique de Montpellier	--	2004	Email	2	no	yes	yes	--	yes	1	yes
WebProAnalyst	36	0	http://wwwmgs.bionet.nsc.ru/mgs/programs/panalyst/	no	Seiten-Ladefehler	--	--	Russland	NSC	--	2005	no	2	no	yes	yes	yes	yes	0	--	--	--
WebSage	19	0	http://bioserv.rpbs.jussieu.fr/websage/	no	Weiterleitung an: http://www2.mnhn.fr/websage/	--	--	Frankreich	MNHN	2004	--	no	2	no	no	yes	--	no	4	--	--	--
WikiGene	19	0	http://andromeda.gsf.de/wiki	yes	no	Datenbank	--	Deutschland	Helmholtz MÃ¼nchen	2009	2009	no	2	no	--	--	--	--	7	yes
WordSpy	0	0	http://cic.cs.wustl.edu/wordspy/	yes	no	--	--	USA	WUSTL	--	2008	no	2	no	no	yes	no	yes	8	yes
YASS	35	0	http://bioinfo.lifl.fr/yass/	yes	no	--	--	Frankreich	Uni des Sciences et Technologies de Lille	2009	--	no	2	no	no	yes	yes	yes	7	yes

## Sheet: NAR-WebServerIssue2006
Name	LT-Score (single service)	LT-Score (collection)	URL (redirect or from Links Directory)	Service Reachable	Error message	Type	Version	Country	Institution	Updated (Website)	Updated (Mozilla)	Login/Registration	Usability	Download required	Example Data	Documentation/Help	Server operational	Fair Testing Possibility	Citations in PMC	Orig URL functional	Redirect/Link	Search Engine
(PS)2 Protein Structure Prediction Server	30	0	http://ps2.life.nctu.edu.tw/	yes	no	--	--	Taiwan	NCTU	--	--	Email	2	no	yes	yes	--	yes	2	yes
3DSS	27	0	http://cluster.physics.iisc.ernet.in/3dss/options.html	yes	no	--	--	Indien	IISC	--	2008	no	2	no	no	no	yes	yes	1	yes
ACT	1	9	http://www.arabidopsis.leeds.ac.uk/act/coexpanalyser.php	yes	no	Sammlung	--	UK	Leeds Uni	--	--	--	2	--	--	--	--	--	25	yes
AlgPred	34	0	http://www.imtech.res.in/raghava/algpred/	yes	no	--	--	Indien	IMTECH	--	2006	no	2	no	no	yes	yes	yes	11	yes
AliWABA	0	0	http://aba.nbcr.net/	no	Seiten-Ladefehler	--	--	USA	NBCR	--		--	--	--	--	--	no	no	0	--	--	--
APID	38	0	http://bioinfow.dep.usal.es/apid/	yes	no	--	--	Spanien	Salamanca Uni	2008	2006	no	1	no	yes	yes	yes	yes	11	yes
ArchPred	22	0	http://manaslu.aecom.yu.edu/loopred/	yes	no	--	--	USA	Yale	2008	2008	Email	2	no	no	yes	--	no	5	--	yes
ARTS	30	0	http://bioinfo3d.cs.tau.ac.il/ARTS/	yes	no	--	--	Israel	TAU	--	2008	Email	2	no	yes	yes	--	yes	7	yes
ASGS	0	0	http://binf1.chem.mq.edu.au:8081/asgs/	no	Seiten-Ladefehler	--	--	Australien	Macquarie	--		--	--	--	--	--	no	no	5	--	--	--
ASPic	20	0	http://t.caspur.it/ASPIC/	yes	no	--	--	Italien	CASPUR	--	--	yes	2	no	--	yes	--	no	4	--	yes
AUGUSTUS	38	0	http://augustus.gobics.de/submission	yes	no	--	--	Deutschland	GÃ¶ttingen Uni	--	--	no	2	no	yes	yes	yes	yes	6	--	yes
Babelomics	1	12	http://www.babelomics.org/	yes	no	Sammlung	v3.2	USA	CIPF	2009	--	yes	3	--	--	--	--	--	41	yes
BAGEL	39	0	http://bioinformatics.biol.rug.nl/websoftware/bagel/bagel_start.php	yes	no	--	v1.0	Niederlande	RUG	--	--	no	2	no	yes	yes	yes	yes	7	--	yes
BindN	35	0	http://bioinformatics.ksu.edu/bindn/	yes	no	--	--	USA	GGC	2009	2009	no	2	no	no	yes	yes	yes	25	yes
Biological Network	0	0	http://brak.sdsc.edu/pub/BiologicalNetworks/	yes	no	--	--	USA	SDSC	--		--	--	--	--	--	no	no	8	--	yes
BLAST	39	0	http://www.ncbi.nlm.nih.gov/BLAST/	yes	no	--	--	USA	NIH	2009	--	no	2	no	yes	yes	yes	yes	29	--	yes
botXminer	19	0	http://botdb.abcc.ncifcrf.gov/	yes	no	Datenbank	--	USA	NCIFCRF	2009	--	nein	2	--	--	--	--	--	1	yes
BTW	20	0	http://bioinformatics.bc.edu/clotelab/BTW/	yes	no	--	--	USA	Boston College	--	2006	no	2	yes	no	yes	--	no	1	yes
CAPweb	22	0	http://bioinfo.curie.fr/CAPweb/	yes	no	--	v2.3	Frankreich	Curie	--	--	yes	3	no	yes	no	--	no	7	yes
CARMAweb	20	0	https://carmaweb.genome.tugraz.at/carma/	yes	no	--	v1.4.1	Ã–sterreich	Graz TU	2008	--	yes	3	--	--	yes	--	no	21	--	yes
Cascade PSI-Blast	29	0	http://crick.mbu.iisc.ernet.in/~CASCADE/CascadeBlast.html	no	404	--	--	Indien	IISC	2008	2008	Email	2	no	yes	yes	--	yes	1	--	--	--
CASTp	36	0	http://sts.bioengr.uic.edu/castp/	yes	no	Datenbank	--	USA	UIC	2005	--	no	3	no	no	yes	yes	yes	36	--	yes
CEAS	37	0	http://ceas.cbi.pku.edu.cn/	yes	no	--	--	China	Peking Uni	--	2007	nein	1	no	yes	yes	yes	yes	18	yes
CMA	29	0	http://www.gene-regulation.com/pub/programs/cma/CMA.html	yes	no	--	--	Deutschland	Biobase GmbH	--	--	no	2	no	yes	yes	--	yes	7	yes
CorGen	39	0	http://corgen.molgen.mpg.de/	yes	no	--	--	Deutschland	MPI MolGen	2006	--	no	2	no	yes	yes	yes	yes	2	yes
CorreLogo	39	0	http://correlogo.abcc.ncifcrf.gov/	yes	no	--	--	USA	NCIFCRF	2006	2007	no	2	no	yes	yes	yes	yes	4	yes
CrossLink	18	0	http://www-ab.informatik.uni-tuebingen.de/software/crosslink/webstart/welcome.html	yes	no	--	v1.2.6	Deutschland	TÃ¼bingen Uni	--	--	no	2	yes	--	yes	--	no	0	--	yes
CRSD	38	0	http://140.120.213.10:8080/crsd/main/home.jsp	yes	no	--	--	Taiwan	NCTU	--	--	nein	2	no	yes	yes	yes	yes	11	--	yes
CUPSAT	25	0	http://cupsat.uni-koeln.de/	yes	Weiterleitung	--	--	Deutschland	KÃ¶ln Uni	--	2006	no	2	no	no	yes	--	--	11	--	yes
DiANNA	39	0	http://bioinformatics.bc.edu/clotelab/DiANNA/	yes	no	--	v1.1	USA	Boston College	--	2008	no	2	no	yes	yes	yes	yes	3	yes
DILIMOT	40	0	http://dilimot.embl.de/	yes	no	--	--	Deutschland	EMBL	2006	--	no	3	no	yes	yes	yes	yes	17	yes
DISULFIND	26	0	http://disulfind.dsi.unifi.it/	yes	no	--	--	Italien	Florenz Uni	2006	--	nein	2	no	no	yes	--	--	9	yes
DOUTfinder	38	0	http://mendel.imp.ac.at/dout/	yes	no	--	--	Ã–sterreich	IMP	--	2008	nein	2	no	yes	yes	yes	yes	0	yes
DyNAVacS	38	0	http://miracle.igib.res.in/dynavac/	yes	no	--	--	Indien	IGIB	--	2006	no	2	no	yes	yes	yes	yes	0	yes
EGassembler	34	0	http://egassembler.hgc.jp/	yes	no	--	--	Japan	Tokio Uni	--	2006	no	2	no	no	yes	yes	yes	10	yes
FAF-Drugs	1	5	http://bioserv.rpbs.jussieu.fr/Help/FAFDrugs.html	yes	no	Sammlung	--	Frankreich	Paris 7	--	2006		1	--	--	--	--	--	6	yes
FastSNP	40	0	http://fastsnp.ibms.sinica.edu.tw/pages/input_CandidateGeneSearch.jsp	yes	no	--	--	Taiwan	Sinica	2006	--	no	3	no	yes	yes	yes	yes	28	--	yes
FeatureMap3D	39	0	http://www.cbs.dtu.dk/services/FeatureMap3D/	yes	no	--	--	DÃ¤nemark	CBS	2006	--	no	2	no	yes	yes	yes	yes	1	yes
FeatureScan	39	0	http://gnaweb.gbf.de/cgi-bin/FeatureScan/FeatureScan.pl	yes	no	--	v2.7	Deutschland	Helmholtz Infektionsforschung	--	--	no	2	no	yes	yes	yes	yes	0	--	yes
FISH	35	0	http://max.ucmp.umu.se/sahmm/	yes	no	--	--	Schweden	UMU	2006	--	no	2	no	no	yes	yes	yes	0	yes
FOLD-RATE	30	0	http://psfs.cbrc.jp/fold-rate/	yes	no	--	--	Japan	CBRC	--	2005	no	1	no	yes	no	yes	yes	7	yes
FootPrinter3	39	0	http://genome.cs.mcgill.ca/cgi-bin/FootPrinter3.0/FootPrinterInput2.pl	yes	no	--	v3.01	Kanada	McGill	--		no	2	no	yes	yes	yes	yes	2	--	yes
GCProfile	35	0	http://tubic.tju.edu.cn/GC-Profile/	yes	no	--	--	China	Tianjin Uni	--	2008	no	2	no	yes	yes	yes	yes	4	yes
GeMprospector	39	0	http://cgi-www.daimi.au.dk/cgi-chili/GeMprospector/main	yes	no	--	--	DÃ¤nemark	Aarhus Uni	2006	--	no	2	no	yes	yes	yes	yes	6	yes
GenDecoder	41	0	http://darwin.uvigo.es/software/gendecoder.html	yes	no	--	v1.6	Spanien	Uni Vigo	2009	--	no	3	no	yes	yes	yes	yes	2	yes
GeneAlign	36	0	http://genealign.hccvs.hc.edu.tw/index.htm	no	Seiten-Ladefehler	--	--	Taiwan	UCSC	2006	2006	no	1	no	yes	yes	yes	yes	4	--	--	--
GEPAS	1	11	http://www.gepas.org/	yes	no	Sammlung	v.4.0	USA	CIPF	--	2007	no	3	--	--	--	--	--	17	yes
GEPS	19	0	http://bioinf.xmu.edu.cn/software/geps/geps.php	yes	no	--	--	China	Xiamen Uni	2006	--	yes	3	--	no	yes	--	no	1	yes
GlyNest and CASPER	35	0	http://www.glycosciences.de/sweetdb/start.php?action=form_shift_estimation	yes	no	--	--	Deutschland	DKFZ	--	--	no	2	no	yes	yes	yes	--	1	yes
GRAMM-X	19	0	http://vakser.bioinformatics.ku.edu/resources/gramm/grammx	yes	no	--	v1.2.0	USA	KU	2009	--	Email	2	no	no	--	--	no	10	yes
Harmony	38	0	http://caps.ncbs.res.in/harmony/	yes	no	--	--	Indien	NCBS	--	2009	no	2	no	yes	yes	yes	yes	1	yes
HHrep	0	0	http://toolkit.tuebingen.mpg.de/index.php?view=hhrep	yes	no	--	--	Deutschland	MPI Entwicklungsbiologie	--	--	--	--	--	--	--	no	no	3	--	--	yes
HHsenser	0	0	http://toolkit.tuebingen.mpg.de/index.php?view=hhsenser	yes	no	--	--	Deutschland	MPI Entwicklungsbiologie	--	--	--	--	--	--	--	no	no	4	--	--	yes
HubMed	21	0	http://www.hubmed.org/	yes	no	Datenbank	--	USA	HubMed	--	2008	no	2	no	--	--	--	--	3	yes
iCR	0	0	http://210.212.212.6/icr/index.html	no	Seiten-Ladefehler	--	--	Indien	--	--		--	--	--	--	--	no	no	2	--	--	--
ITS2	39	0	http://its2.bioapps.biozentrum.uni-wuerzburg.de/	yes	Weiterleitung	--	--	Deutschland	WÃ¼rzburg Uni	2009	--	no	2	no	yes	yes	yes	yes	7	--	yes
JAFA	28	0	http://jafa.burnham.org/	yes	no	--	v0.3	USA	Burnham	2005	--	Email	2	no	no	yes	--	yes	11	yes
jpHMM	31	0	http://jphmm.gobics.de/	yes	no	--	--	Deutschland	GÃ¶ttingen Uni		2009	Email	2	no	yes	yes	--	yes	2	yes
jPREdictor	25	0	http://bibiserv.techfak.uni-bielefeld.de/jpredictor/	yes	no	--	v1.23	Deutschland	Bielefeld Uni	2008	2008	no	2	no	no	yes	--	no	3	yes
JProGO	39	0	http://www.jprogo.de/index.jsp	yes	no	--	--	Deutschland	Braunschweig TU	--	--	no	3	no	yes	yes	yes	yes	10	yes
Kalign, Kalignvu and Mumsa	0	0	http://msa.cgb.ki.se/cgi-bin/msa.cgi	yes	no	--	--	Schweden	Stockholm Uni	2006	--	no	2	no	--	yes	no	yes	8	--	yes
KemaDom	0	0	http://www.iipl.fudan.edu.cn/~lschen/kemadom.htm	no	404	--	--	China	Fudan Uni	--		--	--	--	--	--	no	no	3	--	--	--
KinDOCK	39	0	http://abcis.cbs.cnrs.fr/kindock/	yes	no	--	--	Frankreich	CNRS	2006	--	no	2	no	yes	yes	yes	yes	3	yes
KOBAS	25	0	http://kobas.cbi.pku.edu.cn/	yes	no	--	--	China	Peking Uni	2007	2008	no	3	no	no	yes	--	no	16	yes
Localizome	37	0	http://localizome.org/	no	no	--	--	SÃ¼dkorea	KOBIC	--	2009	no	3	no	yes	yes	yes	yes	4	--	--	--
MAGIIC-PRO	38	0	http://biominer.bime.ntu.edu.tw/magiicpro/	no	Seiten-Ladefehler	--	--	Taiwan	NTU	2008	2006	no	3	no	yes	yes	yes	yes	4	--	--	--
MAVL/StickWRLD	0	0	http://www.microbial-pathogenesis.org/stickwrld/	yes	no	--	--	--	--	--		--	--	--	--	--	no	no	0	--	--	yes
MEME	28	0	http://meme.nbcr.net/meme/intro.html	yes	no	--	v4.1.0	USA	NBCR	--	2009	Email	2	no	yes	yes	--	--	94	--	yes
MeMo	36	0	http://www.bioinfo.tsinghua.edu.cn/%7Etigerchen/memo.html	yes	no	--	v2.0	China	Tsinghua Uni	2006	2006	no	2	no	no	yes	yes	yes	6	yes
metaSHARK	0	0	http://bioinformatics.leeds.ac.uk/shark/	yes	no	--	--	UK	Leeds Uni	2008	2009	no	2	no	--	--	no	yes	3	yes
MicroFootPrinter	38	0	http://bio.cs.washington.edu/MicroFootPrinter.html	yes	no	--	--	USA	UW	--	2007	no	2	no	yes	yes	yes	yes	5	--	yes
MIGenAS Toolkit	1	11	http://www.migenas.org/	yes	no	Sammlung	v1.1.6	Deutschland	MPG	2009	--	yes	2	--	--	--	--	--	2	yes
MoD Tools	1	8	http://159.149.109.16/modtools/	yes	no	Sammlung	--	Italien	Mailand Uni	--	2008	Email	1	--	--	--	--	--	7	--	yes
ModelTest Server	36	0	http://darwin.uvigo.es/software/modeltest_server.html	yes	no	--	v1.0	Spanien	Uni Vigo	2009	--	no	2	no	yes	no	yes	yes	8	yes
MODi	16	0	http://modi.uos.ac.kr/modi/	yes	Weiterleitung	--	--	SÃ¼dkorea	UOS	--	--	yes	1	no	--	yes	--	no	2	--	yes
MPI Toolkit	1	8	http://toolkit.tuebingen.mpg.de/	yes	no	Sammlung	--	Deutschland	MPI Entwicklungsbiologie	2008	--	no	3	--	--	--	--	--	11	yes
MutScreener	26	0	http://bioinfo.bsd.uchicago.edu/MutScreener.html	yes	no	--	--	USA	Chicago Uni	--	2009	Email	1	no	yes	yes	--	--	2	yes
NAST	24	0	http://greengenes.lbl.gov/cgi-bin/nph-NAST_align.cgi	yes	no	--	--	USA	LBL	--	2009	Email	3	no	no	yes	--	--	56	--	yes
Neuropred	31	0	http://neuroproteomics.scs.uiuc.edu/neuropred.html	yes	no	--	--	USA	Illinois	--	2008	no	2	no	no	yes	yes	yes	6	yes
NOMAD-Ref	1	7	http://lorentz.immstr.pasteur.fr/nomad-ref.php	yes	no	Sammlung	--	Frankreich	Pasteur	2006	--	no	2	--	--	--	--	--	11	yes
NXSensor	36	0	http://www.sfu.ca/~ibajic/NXSensor/	yes	no	--	v1.3.1	USA	SFSU	--	2007	no	2	no	yes	yes	yes	yes	1	yes
oGNM	33	0	http://ignm.ccbb.pitt.edu/GNM_Online_Calculation.htm	yes	no	--	--	USA	Pittsburgh Uni	--	2008	no	1	no	no	yes	yes	yes	13	yes
Onto-Tools	1	10	http://vortex.cs.wayne.edu/Projects.html	yes	no	Sammlung	--	USA	Wayne	--	2009	yes	3	--	--	--	--	--	3	yes
OPAAS	25	0	http://opaas.ibms.sinica.edu.tw/	yes	no	--	--	Taiwan	Sinica	2006	2003	Email	2	no	yes	yes	--	--	1	yes
PAL2NAL	39	0	http://coot.embl.de/pal2nal/	yes	no	--	--	Deutschland	EMBL	2009	--	no	2	no	yes	yes	yes	yes	45	yes
PAST	39	0	http://past.in.tum.de/	yes	no	--	--	Deutschland	MÃ¼nchen TU	2008	--	no	2	no	yes	yes	yes	yes	3	yes
Path-A	40	0	http://path-a.cs.ualberta.ca/	yes	no	--	v1.1	Kanada	Alberta Uni	--	--	no	3	no	yes	yes	yes	yes	2	yes
PBE	40	0	http://bioinformatics.univ-reunion.fr/PBE/	yes	no	--	v1.0	Frankreich	La RÃ©union Uni	2007	2007	no	2	no	yes	yes	yes	yes	4	yes
PDA	31	0	http://pda.uab.es/pda2/	yes	no	--	v2.0	Spanien	UAB	--	--	yes	3	no	yes	yes	--	yes	2	--	yes
PDB_Hydro	1	7	http://lorentz.immstr.pasteur.fr/solvate_mutate.php	yes	no	Sammlung	--	Frankreich	Pasteur	2006	--	Email	2	--	--	--	--	--	5	yes
PHEBS	0	0	http://pheps.orgchm.bas.bg/home.html	yes	no	--	--	Bulgarien	BAS	--	--	--	--	--	--	--	no	no	1	yes
pKD	0	0	http://polymerase.ucd.ie/cgi-bin/pKa_Design/server_start.cgi	yes	no	--	--	Irland	UCD	--	--	--	--	--	--	--	no	no	2	--	--	yes
PlotRep	26	0	http://repeats.abc.hu/cgi-bin/plotrep.pl	yes	no	--	--	Ungarn	ABC	2006	--	no	2	no	no	yes	--	--	1	--	yes
PONGO	0	0	http://pongo.biocomp.unibo.it/pongo	yes	no	--	--	Italien	Bologna Uni	--	--	--	--	--	--	--	no	no	9	--	--	yes
POXO	1	9	http://www.bioinfo.biocenter.helsinki.fi/poxo	yes	no	Sammlung	--	Finnland	Helsinki Uni	2006	--	no	1	--	--	--	--	--	2	yes
PreBI	30	0	http://pre-s.protein.osaka-u.ac.jp/~prebi/	yes	no	--	--	Japan	Osaka Uni	--	2009	Email	2	no	yes	yes	--	yes	0	--	--	yes
PREDITOR	38	0	http://wishart.biology.ualberta.ca/shiftor/cgi-bin/preditor_current.py	yes	no	--	--	Kanada	Alberta Uni	--	--	no	2	no	yes	yes	yes	yes	13	--	yes
PrimerStation	35	0	http://ps.cb.k.u-tokyo.ac.jp/	yes	no	--	--	Japan	Tokio Uni	--	--	no	2	no	yes	yes	yes	yes	1	yes
PROFEAT	38	0	http://jing.cz3.nus.edu.sg/cgi-bin/prof/prof.cgi	yes	no	--	--	Singapur	NUS	--		no	2	no	yes	yes	yes	yes	5	yes
PROFtmb	12	0	http://cubic.bioc.columbia.edu/services/proftmb/	yes	no	--	--	USA	Columbia	2008	--	--	--	--	--	--	--	no	4	--	--	yes
ProKware	38	0	http://prokware.mbc.nctu.edu.tw/	yes	no	--	v0.9	Taiwan	NCTU	--	--	no	1	no	yes	yes	yes	yes	0	yes
PromAn	29	0	http://bips.u-strasbg.fr/PromAn/	yes	no	--	--	Frankreich	Strasburg Louis Pasteur	--	2008	Email	1	no	yes	yes	--	yes	5	yes
ProMiR II	0	0	http://cbit.snu.ac.kr/~ProMiR2/	no	Seite wird nicht geladen	--	--	SÃ¼dkorea	SNU	--	--	--	--	--	--	--	no	no	8	--	--	--
ProSAT2	38	0	http://projects.villa-bosch.de/dbase/ps2/	yes	no	--	--	Deutschland	Villa Bosch	2006	2007	no	1	no	yes	yes	yes	yes	1	--	yes
Protein Peeling	0	0	http://www.ebgm.jussieu.fr/~gelly/index.html	yes	no	--	--	Frankreich	Paris 7	--	--	--	--	--	--	--	no	no	0	--	--	yes
Protemot	9	0	http://protemot.csie.ntu.edu.tw/	yes	no	--	--	Taiwan	NTU	2008		--	--	--	--	--	--	no	2	--	--	yes
PSEUDOVIEWER	39	0	http://wilab.inha.ac.kr/pseudoviewer2/	no	Seiten-Ladefehler	--	v3.0	SÃ¼dkorea	Inha University	2009	--	no	3	no	yes	yes	yes	yes	6	--	--	--
pTARGET	30	0	http://bioinformatics.albany.edu/~ptarget	yes	no	--	--	USA	Albany Uni	--	2007	Email	2	no	yes	yes	--	yes	9	yes
PupaSuite	30	0	http://pupasuite.bioinfo.cipf.es/	yes	no	--	v2.0	Spanien	CIPF	2007		no	2	no	--	yes	--	yes	15	--	--	yes
QGRS Mapper	39	0	http://bioinformatics.ramapo.edu/QGRS/index.php	yes	no	--	--	USA	Ramapo College	--	--	no	3	no	yes	yes	yes	yes	11	--	yes
QuadFinder	36	0	http://miracle.igib.res.in/quadfinder/	yes	no	--	v1.0	Indien	IGIB	2006	2006	no	2	no	no	yes	yes	yes	7	yes
Readout	34	0	http://gibk26.bse.kyutech.ac.jp/jouhou/readout/	yes	no	--	--	Japan	KIT	--	2006	no	1	no	yes	yes	yes	yes	9	yes
RegRNA	41	0	http://regrna.mbc.nctu.edu.tw/	yes	no	--	v1.0	Taiwan	NCTU	2006	--	no	3	no	yes	yes	yes	yes	11	yes
ReMus	41	0	http://140.121.196.30/remus.asp	yes	no	--	v1.0.3	Taiwan	NTOU	2006	--	no	3	no	yes	yes	yes	yes	0	--	yes
RNAhybrid	39	0	http://bibiserv.techfak.uni-bielefeld.de/rnahybrid/	yes	no	--	--	Deutschland	Bielefeld Uni	2008	2008	no	2	no	yes	yes	yes	yes	23	yes
RNAMST	39	0	http://bioinfo.csie.ncu.edu.tw/%7Ernamst/	yes	no	--	v1.0	Taiwan	NCU	--	--	no	2	no	yes	yes	yes	yes	3	yes
RosettaDesign	20	0	http://rosettadesign.med.unc.edu/	yes	no	--	--	USA	UNC	--	--	yes	2	no	no	yes	--	no	4	yes
SABBAC	33	0	http://bioserv.rpbs.jussieu.fr/cgi-bin/SABBAC	yes	no	--	v.1.2	Frankreich	Paris 7	2006	--	no	2	no	no	yes	yes	yes	2	yes
ScanProsite	38	0	http://us.expasy.org/tools/scanprosite/	yes	no	--	--	Kanada	SIB	--		no	2	no	yes	yes	yes	yes	38	yes
sgTarget	25	0	http://www.ysbl.york.ac.uk/sgTarget/	yes	no	--	--	UK	York Uni	2006	2006	no	3	no	no	yes	--	no	2	yes
siVirus	22	0	http://sivirus.rnai.jp/	yes	no	--	--	Japan	--	--	2007	no	2	no	--	yes	--	no	3	yes
SNP@DOMAIN	38	0	http://snpnavigator.net/	yes	no	--	--	SÃ¼dkorea	KOBIC	--	--	no	2	no	yes	yes	yes	yes	5	yes
SNPMasker	36	0	http://bioinfo.ebc.ee/snpmasker/	yes	no	--	v1.0	Estland	Tartu Uni	2009	--	no	2	no	no	yes	yes	yes	3	yes
SPRING	38	0	http://algorithm.cs.nthu.edu.tw/tools/SPRING	yes	no	--	--	Taiwan	NCTU	--	--	no	2	no	yes	yes	yes	yes	5	yes
Spritz	27	0	http://distill.ucd.ie/spritz/	yes	no	--	v0.1	Irland	UCD	--	2006	Email	2	no	no	yes	--	yes	6	yes
SSR Primer	0	0	http://bioinformatics.pbcbasc.latrobe.edu.au/ssrdiscovery.html	no	Seiten-Ladefehler	--	--	Australien	La Trobe Uni	--	--	--	--	--	--	--	no	no	4	--	--	--
Stubb	32	0	http://stubb.rockefeller.edu/	yes	no	--	--	USA	Rockefeller	--	2006	no	1	no	yes	yes	yes	no	6	yes
SUMOsp	38	0	http://bioinformatics.lcd-ustc.org/sumosp/prediction.php	no	no	--	v2.0	China	USTC	2009	--	no	2	no	yes	yes	yes	yes	13	--	--	--
SVMHC	0	0	http://www-bs.informatik.uni-tuebingen.de/SVMHC/	yes	no	--	--	Deutschland	TÃ¼bingen Uni	--	--	no	2	no	no	yes	no	--	10	--	--	yes
SWAKK	23	0	http://oxytricha.princeton.edu/SWAKK/	yes	no	--	--	USA	Princeton	2006	2007	no	1	no	no	yes	--	no	3	yes
T-COFFEE	1	9	http://www.tcoffee.org/	yes	no	Sammlung	--	Schweiz	SIB	--	--	no	2	--	--	--	--	--	16	yes
TACT	40	0	http://jbirc.jbic.or.jp/tact/	yes	no	--	v1.9.2	Japan	Japan Biological Informatics Consortium	2008	2008	no	2	no	yes	yes	yes	yes	2	--	--	yes
TarFisDock	17	0	http://www.dddc.ac.cn/tarfisdock/	yes	no	--	--	China	Drug Discovery and Design Center	2007	--	yes	2	no	--	--	--	no	4	yes
Taverna	21	0	http://taverna.sourceforge.net/	yes	no	--	v2.0	USA	--	2009	--	no	2	yes	no	yes	--	no	36	yes
TFBScluster	20	0	http://hscl.cimr.cam.ac.uk/TFBScluster_genome_portal.html	yes	no	--	--	UK	Cambridge	--	2006	Email	1	no	no	yes	--	no	4	yes
TiCo	21	0	http://tico.gobics.de/	yes	no	--	--	Deutschland	Gobics	--	--	Email	2	no	no	yes	--	no	2	yes
TOM	20	0	http://www-micrel.deis.unibo.it/~tom/	yes	no	--	--	Italien	Bologna Uni	--	2007	no	2	no	no	yes	--	no	10	yes
transFold	34	0	http://bioinformatics.bc.edu/clotelab/transFold	yes	no	--	--	USA	Boston College	--	2006	no	2	no	no	yes	yes	yes	0	yes
TreeDet	0	0	http://www.pdg.cnb.uam.es/Servers/treedet/	yes	no	--	--	Spanien	UAM	--	--	--	--	--	--	--	no	no	5	--	--	yes
TreeDomViewer	32	0	http://www.bioinformatics.nl/tools/treedom	yes	no	--	v1.1	Niederlande	Wageningen Bioinformatics Portal	2006	2009	Email	2	no	yes	yes	--	yes	1	yes
TSEMA	0	0	http://pdg.cnb.uam.es/~txemago/TSEMA/	yes	no	--	--	Spanien	UAM	--	--	--	--	--	--	--	no	no	3	--	--	yes
UMMS	0	0	http://biomechanics.ecs.umass.edu/umms.html	no	Seiten-Ladefehler	--	--	USA	Uni Massachutes	--	--	--	--	--	--	--	no	no	1	--	--	--
VIRGO	0	0	http://whipple.cs.vt.edu:8080/virgo	no	Seiten-Ladefehler	--	--	USA	Virginia Tech	--	--	--	--	--	--	--	no	no	3	--	--	--
Virtual Ribosome	0	0	http://www.cbs.dtu.dk/services/VirtualRibosome/	yes	no	--	v1.1	DÃ¤nemark	CBS/TU Denmark	2008	--	no	2	no	yes	yes	no	yes	3	yes
VOMBAT	0	0	http://pdw-24.ipk-gatersleben.de:8080/VOMBAT/	yes	no	--	--	Deutschland	--	--	--	--	--	--	--	--	no	no	0	--	--	yes
WEGO	0	0	http://wego.genomics.org.cn/cgi-bin/wego/index.pl	yes	no	--	--	China	Genomics	2008	--	no	2	no	yes	yes	no	yes	15	yes
YOGY	24	0	http://www.sanger.ac.uk/PostGenomics/S_pombe/YOGY/	yes	no	--	--	UK	Sanger Institute	2008	--	no	2	no	no	yes	--	no	14	yes
Zinc Finger Tools	20	0	http://www.scripps.edu/mb/barbas/zfdesign/zfdesignhome.php	yes	no	--	v3.0	USA	--	--	--	yes	2	no	no	yes	--	no	23	--	yes

## Sheet: NAR-WebServerIssue2007
Name	LT-Score (single service)	LT-Score (collection)	URL (redirect or from Links Directory)	Service Reachable	Error message	Type	Version	Country	Institution	Updated (Website)	Updated (Mozilla)	Login/Registration	Usability	Download required	Example Data	Documentation/Help	Server operational	Fair Testing Possibility	Citations in PMC	Orig URL functional	Redirect/Link	Search Engine
3D-partner	39	0	http://gemdock.life.nctu.edu.tw/3D-partner/vers1/index.php	yes	no	--	--	Taiwan	NCTU	--	--	no	3	no	yes	yes	yes	yes	6	--	yes
3dLOGO	36	0	http://3dlogo.uniroma2.it/3dLOGO/home.html	yes	no	--	--	Italien	Sapienza	2006	2007	no	2	no	yes	yes	yes	yes	0	yes
AStalavista	39	0	http://genome.imim.es/astalavista/	yes	no	--	--	Spanien	Insitut Municipal dâ€˜InvestigaciÃ³ MÃ¨dica	2009	2009	no	2	no	yes	yes	yes	yes	6	yes
Asterias	1	10	http://asterias.bioinfo.cnio.es/	yes	no	Sammlung	--	Spanien	CNIO	2006	2007	--	2	--	--	--	--	--	7	yes
Berkeley Phylogenomics Group	1	9	http://phylogenomics.berkeley.edu/	yes	no	Sammlung	--	USA	Berkeley	--	--	--	2	--	--	--	--	--	5	yes
BioBayesNet	39	0	http://biwww3.informatik.uni-freiburg.de:8080/BioBayesNet/	yes	no	--	--	Deutschland	Freiburg Uni	2006	--	no	2	no	yes	yes	yes	yes	2	yes
BIPASS	38	0	http://bip.umiacs.umd.edu:8080/	no	Seite nicht gefunden	--	--	USA	UMD	2006	2007	no	3	no	yes	yes	yes	yes	1	--	--	--
BLASTO	39	0	http://oxytricha.princeton.edu/BlastO/index.html	yes	no	--	--	USA	Princeton	2007	2007	no	2	no	yes	yes	yes	yes	4	yes
CanPredict	38	0	http://www.cgl.ucsf.edu/Research/genentech/canpredict/	yes	no	--	--	USA	UCSF	--	2009	no	2	no	yes	yes	yes	yes	7	yes
CARGO	24	0	http://cargo2.bioinfo.cnio.es/docs/aboutCargo.html	yes	no	--	v2.0	Spanien	CNIO	--	2008	no	1	no	yes	yes	--	no	3	yes
CodonO	0	0	http://www.sysbio.muohio.edu/CodonO/	no	Seiten-Ladefehler	--	--	USA	MUOhio	--	--	--	--	--	--	--	no	no	0	--	--	--
COMPASS	39	0	http://prodata.swmed.edu/compass/compass.php	yes	no	--	--	USA	Southwestern Medical Center	2008	--	no	2	no	yes	yes	yes	yes	7	--	yes
CPC	39	0	http://cpc.cbi.pku.edu.cn/programs/run_cpc.jsp	yes	no	--	--	China	Peking Uni	2007	--	no	2	no	yes	yes	yes	yes	8	yes
CRISPRFinder	38	0	http://crispr.u-psud.fr/Server/CRISPRfinder.php	yes	no	--	--	Frankreich	Paris 11	--	--	no	2	no	yes	yes	yes	yes	12	yes
CrysTwiV	0	0	http://btweb.aua.gr:8080/crystwiv/	no	Seiten-Ladefehler	--	--	Griechenland	AUA	--	--	--	--	--	--	--	no	no	0	--	--	--
CytoSVM	40	0	http://bioinf.xmu.edu.cn/software/cytosvm/cytosvm.php	yes	no	--	v1.1	China	Xiamen Uni	--	--	no	3	no	yes	yes	yes	yes	0	yes
DAVID Bioinformatics Ressources	1	10	http://david.abcc.ncifcrf.gov/home.jsp	yes	no	Sammlung	--	USA	NCIFCRF	2009	--	--	2	--	--	--	--	--	34	--	yes
DBAli	20	0	http://salilab.org/DBAli/	yes	no	Datenbank	v2.0	USA	UCSF	2008	--	--	2	no	--	--	--	--	5	yes
DEEP	31	0	http://www.bioinf.med.uni-goettingen.de/services/deep/	yes	no	--	v1.0.3	Deutschland	GÃ¶ttingen Uni	--	--	no	3	no	yes	yes	--	yes	0	--	yes
DIAL	0	0	http://bioinformatics.bc.edu/clotelab/DIAL/	yes	no	--	--	USA	BC	2007	2007	no	3	no	no	yes	no	--	6	yes
DOMAC	0	0	http://www.bioinfotool.org/domac.html	yes	no	--	--	USA	Mizzou	--	2009	no	2	no	no	no	no	yes	4	yes
DSHIFT	20	0	http://www.chem.cuhk.edu.hk/DSHIFT/	yes	no	--	--	HK	Chinese Uni Hong Kong	2008	2008	no	2	no	no	no	--	no	0	yes
EBI Tools	1	7	http://www.ebi.ac.uk/Tools/webservices/	yes	no	Sammlung	--	UK	EBI	--	--	--	3	--	--	--	--	--	25	yes
eF-seek	26	0	http://ef-site.hgc.jp/eF-seek/index.jsp	yes	no	--	--	Japan	Tokio Uni	--	--	Email	2	no	no	yes	--	yes	4	yes
eProbalign	0	0	http://probalign.njit.edu/probalign/login	yes	no	--	--	USA	NJIT	--	--	no	2	no	no	yes	no	no	1	--	yes
ESTExplorer	0	0	http://binf1.chem.mq.edu.au:8080/est_pipeline/wrapper_files/login_page_main	yes	no	--	--	Australien	--	--	--	--	--	--	--	--	no	no	12	yes
ESTpass	0	0	http://estpass.kobic.re.kr/index.jsp	yes	no	--	--	SÃ¼dkorea	KOBIC	--	--	--	--	--	--	--	no	no	6	yes
eTBLAST	18	0	http://invention.swmed.edu/etblast/etblast.shtml	yes	no	Suchmaschine	--	USA	Southwestern Uni	--	--	no	2	--	--	--	--	--	2	yes
EVALLER	36	0	http://bioinformatics.bmc.uu.se/evaller/	yes	no	--	v2.0	Schweden	Uppsala Uni	--	2007	no	2	no	yes	yes	yes	yes	0	yes
FastContact	22	0	http://structure.pitt.edu/servers/fastcontact/	yes	no	--	v2.0	USA	Pittsburgh Uni	2007	--	Email	2	no	no	yes	--	--	2	yes
fastSCOP	39	0	http://gemdock.life.nctu.edu.tw/fastSCOP/	yes	no	--	--	Taiwan	NCTU	2009	--	no	2	no	yes	yes	yes	yes	1	--	yes
FatiGOplus	0	0	http://babelomics.bioinfo.cipf.es/fatigoplus/cgi-bin/fatigoplus.cgi	yes	no	--	--	Spanien	CIPF	--	--	--	--	--	--	--	no	no	28	yes
FGF	26	0	http://fgf.genomics.org.cn/service/index.jsp	yes	no	--	v7.0	China	BGI	2007	--	yes	2	no	yes	yes	--	no	3	yes
firestar	39	0	http://firedb.bioinfo.cnio.es/Php/FireStar.php	yes	no	--	--	Spanien	CNIO	--	--	no	3	no	yes	yes	yes	yes	6	yes
FluGenome	38	0	http://www.flugenome.org/	yes	no	--	--	USA	--	2009	--	no	2	no	yes	yes	yes	yes	3	yes
FRalanyzer	0	0	http://fralanyzer.cse.buffalo.edu/	yes	no	--	--	USA	Buffalo Uni	--	2007	no	2	no	no	yes	no	--	0	yes
Frog	36	0	http://bioserv.rpbs.jussieu.fr/cgi-bin/Frog	yes	no	--	v1.01	Frankreich	Paris 7	--	--	no	2	no	yes	yes	yes	yes	4	yes
g:Profiler	39	0	http://biit.cs.ut.ee/gprofiler/	yes	no	--	--	Estland	Tartu Uni	2009	--	no	2	no	yes	yes	yes	yes	23	yes
G2D	39	0	http://www.ogic.ca/projects/g2d_2/	yes	no	--	v4.1	Kanada	OGIC	--	2007	no	2	no	yes	yes	yes	yes	4	yes
GeneHub-GEPIS	38	0	http://www.cgl.ucsf.edu/Research/genentech/genehub-gepis/	yes	no	--	--	USA	UCSF	--	--	no	2	no	yes	yes	yes	yes	2	yes
GeneTrail	36	0	http://genetrail.bioinf.uni-sb.de/index.php	yes	no	--	--	Deutschland	Uni des Saarlandes	--	--	no	3	no	yes	yes	yes	yes	16	yes
Gibbs Motif Sampler	0	0	http://bayesweb.wadsworth.org/gibbs/gibbs.html	yes	--	--	--	USA	Wadsworth Center	--	2008	no	2	no	no	yes	no	no	3	--	--	yes
iHOP	37	0	http://www.ihop-net.org/UniPub/iHOP/	yes	no	--	--	USA	--	--	--	no	2	no	yes	yes	yes	yes	15	--	yes
INDELSCAN	0	0	http://indelscan.genomics.sinica.edu.tw/IndelScan/	yes	no	--	--	Taiwan	Sinica	--	--	--	--	--	--	--	no	no	1	yes
INFO-RNA	36	0	http://www.bioinf.uni-freiburg.de/Software/INFO-RNA/start.html	yes	no	--	--	Deutschland	Freiburg Uni	--	--	no	3	yes	yes	yes	yes	yes	0	yes
iPDA	37	0	http://biominer.bime.ntu.edu.tw/ipda/	no	no	--	--	Taiwan	NTU	2007	2009	no	2	no	yes	yes	yes	yes	2	--	--	--
ISACGH	27	0	http://isacgh.bioinfo.cipf.es/	no	503	--	--	Spanien	Centro de InvestigaciÃ³n PrÃ­ncipe Filipe	2006	--	no	3	no	yes	yes	--	no	7	--	--	--
KAAS	23	0	http://www.genome.jp/kegg/kaas/	yes	no	--	--	Japan	Kyoto Uni	2009	--	Email	2	no	no	no	--	yes	21	yes
KinasePhos 2.0	39	0	http://kinasephos2.mbc.nctu.edu.tw/	yes	no	--	v2.0	Taiwan	NCTU	--	2009	no	2	no	yes	yes	yes	yes	10	yes
KNOTS	37	0	http://knots.mit.edu/	yes	no	--	--	USA	MIT	--	2008	no	1	no	yes	yes	yes	yes	4	yes
LIPID MAPS	1	9	http://www.lipidmaps.org/tools/index.html	yes	no	Sammlung	--	USA	UCSD	--	--	--	2	--	--	--	--	--	5	yes
LTR_Finder	23	0	http://tlife.fudan.edu.cn/ltr_finder/	yes	no	--	--	China	Fudan Uni	--	--	no	2	no	no	yes	--	no	9	yes
M4T	27	0	http://manaslu.aecom.yu.edu/M4T/	yes	no	--	--	USA	Yeshiva Uni	--	2008	no	2	no	no	no	yes	yes	5	--	yes
MADAP	37	0	http://www.isrec.isb-sib.ch/madap/	yes	no	--	--	Schweiz	SIB	--	2008	no	1	no	yes	yes	yes	yes	1	yes
MAGMA	18	0	http://www.magma-fgcz.unizh.ch/pages/loginuser.jsf	yes	no	--	--	Schweiz	ZÃ¼rich ETH	--	--	yes	3	--	--	yes	--	no	4	--	yes
Melinall	41	0	http://melina2.hgc.jp/public/index.html	yes	no	--	v1.1	Japan	Tokio Uni	2006	--	no	3	no	yes	yes	yes	yes	2	--	yes
MetaPath Online	41	0	http://scopes.biologie.hu-berlin.de/	yes	no	--	v0.92b	Deutschland	HU Berlin	2007	--	no	3	no	yes	yes	yes	yes	6	yes
MinActionPath	28	0	http://lorentz.immstr.pasteur.fr/joel/index.php	yes	no	--	--	Frankreich	Pasteur	2007	--	no	2	no	yes	yes	--	no	5	yes
miPred	38	0	http://www.bioinf.seu.edu.cn/miRNA/	yes	no	--	--	China	Southeast Uni	--	2007	no	2	no	yes	yes	yes	yes	11	yes
MobilomeFINDER	1	10	http://mml.sjtu.edu.cn/MobilomeFINDER/	yes	no	Sammlung	v1.0	China	SJTU	2007	2007	--	1	--	--	--	--	--	4	yes
MODPROPED	36	0	http://www.nii.res.in/~narendra/PROT_PEP_INTERACTION/index.html	no	Verbindungsfehler	--	--	Indien	NII	--	2007	no	2	no	yes	yes	yes	yes	2	--	--	--
MOLPROBITY	35	0	http://molprobity.biochem.duke.edu/	yes	no	--	v3.15	USA	Duke	--		no	2	no	no	yes	yes	yes	111	yes
Multi-Phyl	26	0	http://www.cs.nuim.ie/distributed/multiphyl.php	yes	no	--	--	Irland	NUIM	2007	--	Email	1	no	no	yes	--	yes	8	yes
Multi-Q	18	0	http://ms.iis.sinica.edu.tw/Multi-Q-Web/	yes	no	--	--	Taiwan	Sinica	--	2007	no	2	yes	--	--	--	--	2	yes
MYBS	39	0	http://cg1.iis.sinica.edu.tw/~mybs/index.php	yes	no	--	--	Taiwan	Sinica	--	--	no	3	no	yes	yes	yes	yes	5	yes
MyHits	27	0	http://myhits.isb-sib.ch/	yes	no	--	--	Schweiz	SIB	2008	--	no	2	no	yes	yes	--	--	5	yes
NCBI Influenza Virus Sequence Annotation Tool	38	0	http://www.ncbi.nlm.nih.gov/genomes/FLU/Database/annotation.cgi	yes	no	--	--	USA	NCBI	--	--	no	2	no	yes	yes	yes	yes	2	yes
NQ-Flipper	35	0	https://flipper.services.came.sbg.ac.at/cgi-bin/flipper.php	yes	no	--	v2.1.0	Ã–sterreich	Salzburg Uni	--	--	no	2	no	no	yes	yes	yes	0	--	yes
NTMG	38	0	http://oblab.cs.nchu.edu.tw:8080/WebSDL/	yes	no	--	--	Taiwan	NCHU	--	--	no	2	no	yes	yes	yes	yes	0	yes
OligoCalc	24	0	http://www.basic.northwestern.edu/biotools/OligoCalc.html	yes	no	--	v3.23	USA	Northwestern	2008	--	no	1	no	no	yes	--	no	13	--	--	yes
Onto-Tools	1	10	http://vortex.cs.wayne.edu/Projects.html	yes	no	Sammlung	--	USA	Wayne	--	2009	yes	3	--	--	--	--	--	13	yes
OpenHUSAR	1	6	http://genius.embnet.dkfz-heidelberg.de/menu/cgi-bin/w2h-open/w2h.open/w2h.startthis?SIMGO=w2h.welcome	yes	no	Sammlung	--	Deutschland	DKFZ	--	--	--	2	--	--	--	--	--	1	--	yes
oPOSSUM	41	0	http://www.cisreg.ca/oPOSSUM_new/	yes	no	--	v2.0	Kanada	British Columbia Uni	2007	2007	no	3	no	yes	yes	yes	yes	11	--	yes
OPTIMIZER	38	0	http://genomes.urv.es/OPTIMIZER/	yes	no	--	--	Spanien	Tarragona Uni	2007	2007	no	1	no	yes	yes	yes	yes	7	yes
OSCAR	38	0	http://biocomp.bioen.uiuc.edu/oscar/	yes	no	--	--	USA	Illinois	--	--	no	2	no	yes	yes	yes	yes	1	yes
PAP	0	0	http://appserver.wustl.edu:8080/webtools_v4_2/PromoterSearch.do	yes	no	--	--	USA	WUSTL	--	--	--	--	--	--	--	no	no	5	yes
PAR-3D	29	0	http://sunserver.cdfd.org.in:8080/protease/PAR_3D/index.html	yes	no	--	--	Indien	CDFD	2007	2007	no	2	no	no	yes	--	yes	5	yes
PathExpress	39	0	http://bioinfoserver.rsbs.anu.edu.au/utils/PathExpress/	yes	no	--	--	Australien	ANU	2007	--	no	2	no	yes	yes	yes	yes	13	yes
Pcons.net	32	0	http://pcons.net/	yes	no	--	--	Schweden	Stockholm Uni	2006	--	no	2	no	--	yes	yes	yes	5	yes
PDB2PQR Server	32	0	http://pdb2pqr.sourceforge.net/	yes	no	--	v1.4.0	USA	SourceForge Project	2007	2009	no	1	yes	--	yes	yes	yes	11	yes
PFP	0	0	http://pfp.technion.ac.il/	yes	no	--	--	Israel	Technion	--	--	no	2	no	no	yes	no	yes	4	yes
Phobius	0	0	http://phobius.cgb.ki.se/	yes	no	--	--	Schweden	Karolinska Institut	--	--	--	--	--	--	--	no	no	24	--	--	yes
Phylemon	1	6	http://phylemon.bioinfo.cipf.es/cgi-bin/tools.cgi	yes	no	Sammlung	--	Spanien	Centro de InvestigaciÃ³n PrÃ­ncipe Filipe	--	--	--	2	--	--	--	--	--	4	yes
PI2PE	1	9	http://pipe.scs.fsu.edu/	yes	no	Sammlung	--	USA	FSU	--	2008	--	2	--	--	--	--	--	3	yes
PIC	39	0	http://crick.mbu.iisc.ernet.in/~PIC/	yes	no	--	--	Indien	IISC	--	2009	no	3	no	yes	yes	yes	yes	3	yes
pKNOT	35	0	http://pknot.life.nctu.edu.tw/	yes	no	--	v1.0	Taiwan	NCTU	--	--	no	2	no	yes	no	yes	yes	1	yes
pknotsRG	39	0	http://bibiserv.techfak.uni-bielefeld.de/pknotsrg/	yes	no	--	--	Deutschland	Bielefeld Uni	2009	2009	no	2	no	yes	yes	yes	yes	5	yes
PMG	36	0	http://bioserv.rpbs.jussieu.fr/~autin/cgi-bin/PMG	yes	no	--	v2.0	Frankreich	Paris 7	--	--	no	2	no	yes	yes	yes	yes	3	yes
PrDOS	35	0	http://prdos.hgc.jp/cgi-bin/top.cgi	yes	no	--	--	Japan	HGC	--	--	no	3	no	no	yes	yes	yes	11	--	yes
Primer Z	38	0	http://genepipe.ngc.sinica.edu.tw/primerz/beginDesign.do	no	Verbindungsfehler	--	v3.1	Taiwan	Sinica	2009	--	no	2	no	yes	yes	yes	yes	3	--	--	--
Primer3Plus	23	0	http://www.bioinformatics.nl/cgi-bin/primer3plus/primer3plus.cgi	yes	no	--	--	Niederlande	Wageningen Uni	--	--	no	2	no	no	yes	--	no	12	--	yes
PROMALS and PROMALS3D	38	0	http://prodata.swmed.edu/promals/promals.php	yes	no	--	--	USA	Southwestern Medical Center	--	--	no	2	no	yes	yes	yes	yes	4	--	yes
ProMateus	24	0	http://bioportal.weizmann.ac.il/promate/	yes	no	--	--	Israel	Weizmann	--	2007	no	2	no	yes	yes	--	no	1	--	--	yes
ProSA-web	35	0	https://prosa.services.came.sbg.ac.at/prosa.php	yes	no	--	--	Ã–sterreich	Salzburg Uni	--	--	no	3	no	no	yes	yes	yes	10	--	yes
ProSight PTM	15	0	http://prosightptm2.scs.uiuc.edu/	yes	no	--	v2.0	USA	Illinois	2009	2009	yes	2	--	--	--	--	no	3	yes
Protein Dipole Server	34	0	http://bioportal.weizmann.ac.il/dipol/	yes	no	--	--	Israel	Weizmann	--	2007	--	1	no	yes	yes	yes	yes	6	--	yes
QSCOP - BLAST	27	0	http://qscop-blast.services.came.sbg.ac.at/	yes	no	--	--	Ã–sterreich	Salzburg Uni	--	--	no	2	no	no	no	yes	yes	1	yes
QuickSNP	0	0	http://bioinformoodics.jhmi.edu/quickSNP.pl	yes	no	--	--	USA	Johns Hopkins Medical Institutions	--	--	--	--	--	--	--	no	no	0	yes
RADAR	24	0	http://datalab.njit.edu/biodata/rna/RSmatch/server.htm	yes	no	--	--	USA	NJIT	--	2008	yes	2	no	yes	yes	--	no	3	yes
RCI	27	0	http://wishart.biology.ualberta.ca/rci/cgi-bin/rci_cgi_1_d.py	yes	no	--	--	Kanada	Alberta Uni	--	--	no	2	no	yes	yes	--	no	2	--	yes
RE-MuSiC	34	0	http://140.113.239.131/RE-MUSIC/	yes	no	--	--	Taiwan	NCTU	--	2008	no	2	no	no	yes	yes	yes	0	yes
REPK	29	0	http://rocaplab.ocean.washington.edu/tools/repk	yes	no	--	v1.2	USA	UW	2009	--	--	3	no	yes	yes	--	--	1	yes
RF_DYMHC	29	0	http://www.bioinf.seu.edu.cn/Recombination/rf_dymhc.htm	yes	no	--	--	China	Southeast Uni	2007	2007	no	2	no	no	yes	--	yes	0	yes
RNA Movies	40	0	http://bibiserv.techfak.uni-bielefeld.de/rnamovies/	yes	no	--	v2.0.4	Deutschland	Bielefeld Uni	2007	2007	no	2	no	yes	yes	yes	yes	2	yes
RNABindR	30	0	http://bindr.gdcb.iastate.edu/RNABindR/	yes	no	--	--	USA	Iowa State	--	--	no	1	no	yes	no	yes	yes	11	yes
RNAbor	27	0	http://bioinformatics.bc.edu/clotelab/RNAbor/	yes	no	--	--	USA	Boston College	--	--	Email	3	no	no	yes	--	yes	1	yes
RNAz	39	0	http://rna.tbi.univie.ac.at/cgi-bin/RNAz.cgi	yes	no	--	--	Ã–sterreich	Wien Uni	--	--	no	3	no	yes	yes	yes	yes	8	--	yes
RSRE	30	0	http://biosrv1.bmi.ac.cn/RSRE/	yes	no	--	--	China	BMI	--	--	Email	2	no	yes	yes	--	yes	3	yes
RTAnalyzer	31	0	http://www.riboclub.org/cgi-bin/RTAnalyzer/index.pl?page=rt_find	yes	no	--	--	Kanada	Riboclub Society	2009	--	Email	2	no	yes	yes	--	yes	1	--	yes
SAGExplore	40	0	http://protein.bio.puc.cl/cardex/servers/sagexplore/home.php	yes	no	--	--	Chile	PUC	2007	--	no	3	no	yes	yes	yes	yes	1	--	yes
SCOPE	35	0	http://genie.dartmouth.edu/scope/	yes	no	--	--	USA	Dartmouth College	2008	--	no	2	no	no	yes	yes	yes	5	yes
Selecton	27	0	http://selecton.bioinfo.tau.ac.il/	yes	Weiterleitung nach http://selecton.tau.ac.il/	--	v2.4	Israel	TAU	--	2009	Email	2	no	no	yes	--	yes	12	yes
SEPACS	27	0	http://fred.bioinf.uni-sb.de/sepacs.html	yes	no	--	--	Deutschland	Uni des Saarlandes	--	2007	no	2	no	yes	yes	--	no	0	--	yes
Sequence Harmony	38	0	http://zeus.cs.vu.nl/programs/seqharm/	yes	Weiterleitung nach http://www.ibi.vu.nl/programs/seqharmwww/	--	--	Niederlande	Amsterdam Uni	--	--	no	2	no	yes	yes	yes	yes	4	--	--	yes
SH3-Hunter	36	0	http://cbm.bio.uniroma2.it/SH3-Hunter/	yes	no	--	--	Italien	Sapienza	--	2006	no	3	no	yes	yes	yes	yes	3	yes
SiteFINDER|3D	0	0	http://sage.csb.yale.edu/sitefinder3d/	yes	no	--	--	USA	Yale	--	--	--	--	--	--	--	no	no	4	--	--	yes
SLiMDisc	35	0	http://bioware.ucd.ie/~slimdisc/	yes	no	--	--	Irland	UCD	--	2007	no	2	no	yes	yes	yes	yes	2	--	yes
SplicePort	0	0	http://spliceport.cs.umd.edu:2000/SplicingAnalyser2.html	yes	Seiten-Ladefehler	--	--	USA	UMD	--	--	--	--	--	--	--	no	no	0	--	yes
STAMP	38	0	http://www.benoslab.pitt.edu/stamp/	yes	no	--	--	USA	MIT	--	--	no	2	no	yes	yes	yes	yes	27	yes
StSNP	36	0	http://glinka.bio.neu.edu/StSNP/index_2006.html	no	Verbindungsfehler	--	--	USA	NEU	--	2007	no	2	no	yes	yes	yes	yes	2	--	--	--
T-COFFEE	38	0	http://www.tcoffee.org/	yes	--	--	--	Schweiz	SIB	--	--	no	2	no	yes	yes	yes	yes	13	yes
taveRNA	1	10	http://compbio.cs.sfu.ca/taverna/	yes	no	Sammlung	--	Kanada	SFU	--	2009	no	3	--	--	--	--	--	1	yes
TFAM	36	0	http://tfam.lcb.uu.se/	yes	no	--	v1.3	Schweden	Uppsala Uni		2007	no	2	no	no	yes	yes	yes	2	yes
VisANT	40	0	http://visant.bu.edu/	yes	no	--	v3.62	USA	BU	2009	2008	no	2	no	yes	yes	yes	yes	12	yes
VISTA	1	9	http://genome.lbl.gov/vista/index.shtml	yes	no	Sammlung	--	USA	LBL	--	--	no	2	--	--	--	--	--	4	--	yes
WebMOTIFS	27	0	http://fraenkel.mit.edu/webmotifs/	yes	no	--	--	USA	MIT	2009	2009	Email	2	no	no	yes	--	yes	3	yes
WebTraceMiner	0	0	http://www.conifergdb.org/software/wtm1.0/	yes	no	--	--	USA	--	--	--	--	--	--	--	--	no	no	5	--	yes
WhETS	0	0	http://www4.rothamsted.bbsrc.ac.uk/whets/cgi-bin/whets1.2/whets_home.pl	yes	Weiterleitung zu Version 1.3	--	v1.2	UK	Biotechnology and Biological Sciences Research Council	--	--	no	2	no	yes	yes	no	yes	2	--	yes
WoLF PSORT	16	0	http://wolfpsort.org/	yes	no	--	v0.2	Japan	AIST	--	--	no	1	yes	--	--	--	no	63	--	yes
ZiFiT	22	0	http://bindr.gdcb.iastate.edu/ZiFiT/	yes	no	--	v3.0	USA	Iowa State	--	--	no	2	yes	yes	yes	--	no	8	yes

## Sheet: NAR-WebServerIssue2008
Name	LT-Score (single service)	LT-Score (collection)	URL (redirect or from Links Directory)	Service Reachable	Error message	Type	Version	Country	Institution	Updated (Website)	Updated (Mozilla)	Login/Registration	Usability	Download required	Example Data	Documentation/Help	Server operational	Fair Testing Possibility	Citations in PMC	Orig URL functional	Redirect/Link	Search Engine
3D-Fun	23	0	http://3dfun.bioinfo.pl/	yes	no	--	--	Polen	BioInfoBank Institute	--	--	Email	2	no	yes	no	--	yes	1	yes
PIE	39	0	http://bi.snu.ac.kr/pie/	yes	no	--	--	SÃ¼dkorea	SNU	--	--	no	3	no	yes	yes	yes	yes	2	yes
pFlexAna	0	0	http://bigbird.comp.nus.edu.sg/pfa2/	yes	no	--	--	Singapur	NUS	--	--	no	2	no	no	yes	no	yes	0	yes
GraphWeb	39	0	http://biit.cs.ut.ee/graphweb/	yes	no	--	--	Estland	Tartu Uni	--	--	no	3	no	yes	yes	yes	yes	5	yes
AMIC@	0	0	http://bioalgo.iit.cnr.it/amica	yes	no	--	--	Italien	CNR	--	2008	no	2	no	yes	yes	no	yes	1	yes
OGtree	27	0	http://bioalgorithm.life.nctu.edu.tw/OGtree/	yes	no	--	v1.0	Taiwan	NCTU	--	--	Email	2	no	no	yes	--	yes	0	yes
SARSA	23	0	http://bioalgorithm.life.nctu.edu.tw/SARSA	yes	no	--	--	Taiwan	NCTU	--	--	no	1	no	yes	yes	--	no	2	yes
FFPred	26	0	http://bioinf.cs.ucl.ac.uk/ffpred/	yes	no	--	--	UK	London Uni College	--	2008	Email	2	no	no	yes	--	yes	1	--	--	yes
MAGNOLIA	39	0	http://bioinfo.lifl.fr/magnolia	yes	no	--	--	Frankreich	LIFL/USTL	2007	--	no	2	no	yes	yes	yes	yes	0	yes
OligoHeatMap	40	0	http://bioinfo.unice.fr/ohm/	yes	no	--	v1.51	Frankreich	Nice Sophia Antipolis Uni	--	2009	no	3	no	yes	yes	yes	yes	0	yes
pssRNAMiner	35	0	http://bioinfo3.noble.org/pssRNAMiner/	yes	no	--	--	USA	Noble Foundation	--	--	--	2	no	yes	yes	yes	yes	1	yes
FireDock	30	0	http://bioinfo3d.cs.tau.ac.il/FireDock/	yes	no	--	--	Israel	TAU	--	2008	Email	2	no	yes	yes	--	yes	4	yes
MAPPIS	38	0	http://bioinfo3d.cs.tau.ac.il/MAPPIS	yes	no	--	--	Israel	TAU	--	2008	no	2	no	yes	yes	yes	yes	4	yes
MolAxis	29	0	http://bioinfo3d.cs.tau.ac.il/MolAxis	yes	no	--	--	Israel	TAU	--	2009	no	2	no	yes	yes	--	--	2	yes
MultiBind	33	0	http://bioinfo3d.cs.tau.ac.il/MultiBind	yes	no	--	--	Israel	TAU	--	2009	no	2	no	yes	yes	yes	no	4	yes
PharmaGist	30	0	http://bioinfo3d.cs.tau.ac.il/PharmaGist	yes	no	--	--	Israel	TAU	--	2008	Email	2	no	yes	yes	--	yes	2	yes
LocalMove	38	0	http://bioinformatics.bc.edu/clotelab/localmove/	yes	no	--	--	USA	Boston College	--	2008	no	2	no	yes	yes	yes	yes	0	yes
Superimpose	31	0	http://bioinformatics.charite.de/superimpose	yes	no	--	v1.1.7	Deutschland	CharitÃ©	2008	--	no	3	no	--	yes	--	yes	2	yes
SuperPred	35	0	http://bioinformatics.charite.de/superpred	yes	no	--	--	Deutschland	CharitÃ©	--	--	no	2	no	yes	yes	yes	--	1	yes
ConTra	38	0	http://bioit.dmbr.ugent.be/ConTra/index.php	yes	no	--	--	Belgien	Gent Uni	--	--	no	2	no	yes	yes	yes	yes	4	yes
BioLit	35	0	http://biolit.ucsd.edu/	yes	no	Datenbank	--	USA	UCSD	--	--	no	3	no	--	yes	yes	yes	3	yes
bioNMF	39	0	http://bionmf.dacya.ucm.es/	yes	no	--	--	Spanien	UCM	--	--	no	3	no	yes	yes	yes	yes	2	yes
BIOSMILE	22	0	http://bioservices.cse.yzu.edu.tw/BWS	no	Server nicht gefunden	Suchmaschine	v2.0	Taiwan	Yuan Ze Uni	2008	--	no	3	no	--	no	--	--	0	--	--	--
HOMCOS	40	0	http://biunit.naist.jp/homcos	yes	no	--	v1.0	Japan	NAIST	2009	2009	no	2	no	yes	yes	yes	yes	1	yes
CRISPRcompar	38	0	http://crispr.u-psud.fr/CRISPRcompar/	yes	no	--	--	Frankreich	Paris 11	--	--	no	2	no	yes	yes	yes	yes	1	yes
DiRE	30	0	http://dire.dcode.org/	yes	no	--	--	USA	Dcode	2008	--	no	2	no	yes	yes	--		2	yes
E1DS	40	0	http://e1ds.ee.ncku.edu.tw/	yes	no	--	--	Taiwan	NCKU	2008	2008	no	3	no	yes	yes	yes	yes	1	yes
E3Miner	22	0	http://e3miner.biopathway.org/	yes	no	Suchmaschine	v1.1	SÃ¼dkorea	KAIST	--	2008	no	2	no	--	--	--	--	1	yes
SerbGO	1	9	http://estbioinfo.stat.ub.es/apli/serbgo	yes	no	Sammlung	--	Spanien	Barcelona Uni	--	--	--	2	no	--	--	--	--	1	yes
GeConT 2	0	0	http://gecont.ibt.unam.mx/cgi-bin/gecont/gecont.pl	yes	no	--	--	Mexiko	UNAM	2008	--	no	2	no	yes	yes	no	yes	1	--	yes
GeneCAT	38	0	http://genecat.mpg.de/	yes	no	--	--	Deutschland	MPG	--	--	no	2	no	yes	yes	yes	yes	4	yes
GenoWatch	39	0	http://genepipe.ngc.sinica.edu.tw/genowatch	no	Server nicht gefunden	--	v1.8	Taiwan	Sinica	2008	--	no	3	no	yes	yes	yes	yes	1	--	--	--
WAR	32	0	http://genome.ku.dk/resources/war	yes	no	--	--	DÃ¤nemark	Kopenhagen Uni	2007	--	Email	3	no	yes	yes	--	yes	2	yes
Onto-CC	38	0	http://gps-tools2.wustl.edu/onto-cc/index.html	yes	no	--	--	Spanien	UGR	--		no	2	no	yes	yes	yes	yes	0	yes
GLUE, GLUE-IT, PEDEL, PEDEL-AA and DRIVeR	1	5	http://guinevere.otago.ac.nz/stats.html	yes	no	Sammlung	--	Neuseeland	Otago Uni	--	2009	--	1	no	--	--	--	--	0	yes
xREI	27	0	http://harmony.biowiki.org/xrei/	no	Server nicht gefunden	--	--	USA	Berkeley	--	2008	no	2	no	yes	yes	--	--	0	--	--	--
Hubba	39	0	http://hub.iis.sinica.edu.tw/Hubba	yes	no	--	--	Taiwan	Sinica	2008	--	no	2	no	yes	yes	yes	yes	1	yes
PVS	39	0	http://imed.med.ucm.es/PVS/	yes	no	--	--	Spanien	UCM	2008	2008	no	2	no	yes	yes	yes	yes	0	yes
IMGT/V-QUEST	40	0	http://imgt.cines.fr/	yes	no	--	v3.2.2	Frankreich	IMGT	2009	--	no	2	no	yes	yes	yes	yes	5	yes
DAhunter	38	0	http://localodom.kobic.re.kr/dahunter/index.htm	no	Server nicht gefunden	--	--	SÃ¼dkorea	KRIBB	2008			3	no	yes	yes	yes	yes	3	--	--	--
MassNet	38	0	http://massnet.kr/	yes	no	--	--	SÃ¼dkorea	KOBIC Bioinformation Center	--	--	no	2	no	yes	yes	yes	yes	2	yes
MassTRIX	39	0	http://masstrix.org/	yes	no	--	--	Deutschland	Helmholtz MÃ¼nchen	2009	2009	no	2	no	yes	yes	yes	yes	4	yes
OREST	23	0	http://mips.gsf.de/genre/proj/orest/index.html	yes	no	--	--	Deutschland	Helmholtz MÃ¼nchen	2009	--	Email	2	no	no	no	--	yes	2	yes
MKT	38	0	http://mkt.uab.es/	yes	no	--	--	Spanien	UAB	--	--	no	2	no	yes	yes	yes	yes	1	yes
GOEAST	1	10	http://omicslab.genetics.ac.cn/GOEAST/	yes	no	Sammlung	v1.12	China	Chinese Academy of Sciences	--	2009	--	2	no	--	--	--	--	13	yes
PaLS	40	0	http://pals.bioinfo.cnio.es/	yes	no	--	--	Spanien	Centro NacionÃ¡l de Investigaciones OncolÃ³gicas	2008	2009	no	3	no	yes	yes	yes	yes	3	yes
webPIPSA	0	0	http://pipsa.eml.org/	yes	no	--	--	Deutschland	EML	2009	--	no	2	no	no	yes	no	yes	2	yes
Predikin	41	0	http://predikin.biosci.uq.edu.au/	yes	no	--	v2.0	Australien	UQ	2008	--	no	3	no	yes	yes	yes	yes	1	yes
PROMALS and PROMALS3D	38	0	http://prodata.swmed.edu/promals/promals.php	yes	no	--	--	USA	Southwestern Medical Center	--	--	no	2	no	yes	yes	yes	yes	1	yes
QUMA	39	0	http://quma.cdb.riken.jp/	yes	no	--	--	Japan	RIKEN	2009	2009	no	2	no	yes	yes	yes	yes	4	yes
Vienna RNA Websuite	1	12	http://rna.tbi.univie.ac.at/	yes	no	Sammlung	v1.8.2	Ã–sterreich	Wien Uni	2009	2009	--	3	no	--	--	--	--	16	yes
OligoWalk	31	0	http://rna.urmc.rochester.edu/servers/oligowalk	yes	no	--	--	USA	Rochester Uni	2007	--	Email	2	no	yes	yes	--	yes	2	yes
RNALogo	38	0	http://rnalogo.mbc.nctu.edu.tw/	yes	no	--	--	Taiwan	NCTU	--	--	no	2	no	yes	yes	yes	yes	5	yes
RosettaDock Server	22	0	http://rosettadock.graylab.jhu.edu/	yes	no	--	v2.1	USA	JHU	--	--	Email	2	no	no	yes	--	no	5	yes
RSAT	1	9	http://rsat.ccb.sickkids.ca/	yes	no	Sammlung	--	Kanada	--	2008	2008	--	2	--	--	--	--	--	10	yes
NeAT	1	9	http://rsat.ulb.ac.be/neat/	yes	no	Sammlung	--	Belgien	ULB	--	2008	--	2	--	--	--	--	--	5	yes
CoPub	25	0	http://services.nbic.nl/cgi-bin/copub/CoPub.pl	yes	no	--	v2.5a	Niederlande	NBIC	2009	--	no	2	no	no	yes	--	no	2	yes
DHcL	35	0	http://sitron.bccs.uib.no/dhcl/	yes	no	--	--	Norwegen	Bergen Uni	--	--	no	2	no	yes	yes	yes	yes	0	yes
TargetRNA	23	0	http://snowwhite.wellesley.edu/targetRNA	yes	no	--	--	USA	Wellesley College	--	2007	no	2	no	no	yes	--	no	1	yes
soaPDB	8	0	http://soapdb.dyndns.org:3000/	no	Server nicht gefunden	--	v2	USA	--	--	--	yes	2	--	--	--	--	no	0	--	--	--
Software.ncrna.org	1	5	http://software.ncrna.org/	yes	no	Sammlung	--	Japan	--	--	--	--	2	no	--	--	--	--	0	yes
CGView Server	31	0	http://stothard.afns.ualberta.ca/cgview_server/	yes	no	--	--	Kanada	Alberta Uni	2007	2009	Email	2	no	yes	yes	--	yes	5	yes
AsiDesigner	39	0	http://sysbio.kribb.re.kr/AsiDesigner/	yes	no	--	--	SÃ¼dkorea	KRIBB	2009	--	no	2	no	yes	yes	yes	yes	1	yes
IEDB-AR	1	10	http://tools.immuneepitope.org/	yes	no	Sammlung	--	USA	LIAI	--	2008	--	3	no	--	--	--	--	3	yes
UM-PPS	25	0	http://umbbd.msi.umn.edu/predict/	yes	no	--	--	USA	UMN	2008	--	no	3	no	--	yes	--	no	5	yes
Universal Probes	21	0	http://uprobe.genetics.emory.edu/	yes	no	Datenbank	--	USA	Emory	--	--	no	2	no	--	--	--	--	0	yes
RAPIDO	28	0	http://webapps.embl-hamburg.de/rapido	yes	no	--	v0.99b	Deutschland	European Molecular Biology Laboratory Hamburg	2008	--	Email	2	no	yes	no	--	yes	2	yes
ProfCom	21	0	http://webclu.bio.wzw.tum.de/profcom/	yes	no	--	--	Deutschland	MÃ¼nchen TU	--	--	no	3	no	--	yes	--	no	9	yes
PolySearch	27	0	http://wishart.biology.ualberta.ca/polysearch	yes	no	Suchmaschine	--	Kanada	Alberta Uni	2008	--	no	3	no	--	yes	--	--	9	yes
PROTEUS2	0	0	http://wishart.biology.ualberta.ca/proteus2	yes	no	--	v2.0	Kanada	Alberta Uni	--	2008	no	2	no	yes	yes	no	yes	1	yes
Babelomics	1	12	http://www.babelomics.org/	yes	no	Sammlung	v3.2	USA	CIPF	2009	--	--	3	no	--	--	--	--	11	yes
MADNet	35	0	http://www.bioinfo.hr/madnet	yes	no	--	--	Kroatien	Zagreb Uni	--	--	no	2	no	yes	yes	yes	yes	0	yes
SEQATOMS	29	0	http://www.bioinformatics.nl/tools/seqatoms	yes	no	--	v1.0	Niederlande	Wageningen Uni	2008	2008	no	2	no	yes	yes	--	no	1	yes
NetMHC-3.0	0	0	http://www.cbs.dtu.dk/services/NetMHC	yes	no	--	v3.0	DÃ¤nemark	DTU	2009	--	no	2	no	yes	yes	no	yes	5	yes
PBEQ-Solver	34	0	http://www.charmm-gui.org/?doc=input/pbeqsolver	yes	no	--	--	USA	KU	--	--	no	2	no	no	yes	yes	yes	2	yes
Signature	0	0	http://www.cmbi.ru.nl/signature	yes	no	--	--	Niederlande	RU	--	--	no	2	no	yes	yes	no	yes	0	yes
Jpred 3	34	0	http://www.compbio.dundee.ac.uk/jpred	yes	no	--	--	UK	Dundee Uni	--	2008	no	2	no	no	yes	yes	yes	26	yes
TarO	40	0	http://www.compbio.dundee.ac.uk/taro	yes	no	--	v2.0	UK	Dundee Uni	2007	--	no	2	no	yes	yes	yes	yes	3	yes
SCANPS	19	0	http://www.compbio.dundee.ac.uk/www-scanps	yes	no	--	--	UK	Dundee Uni	--	--	Email	2	no	no	no	--	yes	0	yes
CS23D	31	0	http://www.cs23d.ca/	yes	no	--	--	Kanada	Alberta Uni	2008	2009	Email	2	no	yes	yes	--	yes	3	yes
Ontology Lookup Service	40	0	http://www.ebi.ac.uk/ols	yes	no	Suchmaschine	v1.27	UK	European Bioinformatics Institute	2009	--	no	2	no	yes	yes	yes	yes	6	yes
EpiToolKit	1	10	http://www.epitoolkit.org/	yes	no	Sammlung	--	Deutschland	TÃ¼bingen Uni	--	--	--	3	no	--	--	--	--	2	yes
ENDEAVOUR	39	0	http://www.esat.kuleuven.be/endeavourweb	yes	no	--	--	Belgien	Leuven KU	2008	--	no	2	no	yes	yes	yes	yes	5	yes
KEGG: Kyoto Encyclopedia of Genes and Genomes	40	0	http://www.genome.ad.jp/kegg/	yes	no	Datenbank	v50.2	Japan	Kyoto Uni	2009	--	no	2	no	yes	yes	yes	yes	18	--	--	yes
GEPAS	1	11	http://www.gepas.org/	yes	no	Sammlung	v.4.0	USA	CIPF	--	2007	--	3	no	--	--	--	--	9	yes
IDT SCITools	1	9	http://www.idtdna.com/SciTools/SciTools.aspx	yes	no	Sammlung	--	Niederlande	Integrated DNA Technolgies	--	--	--	2	no	--	--	--	--	0	yes
ISPIDER Central	38	0	http://www.ispider.manchester.ac.uk/cgi-bin/ProteomicSearch.pl	yes	no	--	--	UK	Manchester Uni	--	--	no	2	no	yes	yes	yes	yes	2	--	--	yes
Microarray Retriever	27	0	http://www.lgtc.nl/MaRe/	yes	no	--	--	Niederlande	LUMC	--	--	Email	2	no	yes	yes	--	--	1	yes
NOBAI	1	9	http://www.manet.uiuc.edu/nobai/nobai.php	yes	no	Sammlung	--	USA	Illinois	2007	--	no	1	no	--	--	--	--	0	yes
KFC Server	20	0	http://www.mitchell-lab.org/kfc	yes	no	--	--	USA	Mitchell Lab	--	--	yes	2	no	--	yes	--	no	2	yes
BLAST	39	0	http://www.ncbi.nlm.nih.gov/BLAST/	yes	no	--	--	USA	NIH	2009	--	no	2	no	yes	yes	yes	yes	10	--	yes
Phylogeny.fr	1	9	http://www.phylogeny.fr/	yes	no	Sammlung	--	Frankreich	Centre National de Recherche Scientifique	--	2008	--	2	--	--	--	--	--	26	yes
Prodonet	38	0	http://www.prodonet.tu-bs.de/	yes	no	--	--	Deutschland	Braunschweig TU	--	--	no	2	no	yes	yes	yes	yes	3	yes
R-Coffee	38	0	http://www.tcoffee.org/	yes	no	--	--	Schweiz	SIB	--	--	no	2	no	yes	yes	yes	yes	2	yes
CPA - Comparative Pathway Analyzer	1	7	https://www.cebitec.uni-bielefeld.de/groups/brf/software/cpa/index.html	yes	no	Sammlung	v1.0	Deutschland	Bielefeld Uni	--	2008	--	2	no	--	--	--	--	1	yes

## Sheet: NAR-WebServerIssue2009
Name	LT-Score (single service)	LT-Score (collection)	URL (redirect or from Links Directory)	Service Reachable	Error message	Type	Version	Country	Institution	Updated (Website)	Updated (Mozilla)	Login/Registration	Usability	Download required	Example Data	Documentation/Help	Server operational	Fair Testing Possibility	Citations in PMC	Orig URL functional	Redirect/Link	Search Engine
ANNIE	36	0	http://annie.bii.a-star.edu.sg/	yes	no	--	v1.0	Taiwan	A-Star	--	--	no	2	no	yes	yes	yes	yes	2	yes
ATIVS	39	0	http://annie.bii.a-star.edu.sg/	yes	no	--	--	Taiwan	NHRI	2009	--	no	2	no	yes	yes	yes	yes	0	yes
RosettaAntibody	32	0	http://antibody.graylab.jhu.edu/	yes	no	--	--	USA	JHU	--	--	no	2	no	yes	yes	--	yes	1	yes
MolLoc	38	0	http://bcb.dei.unipd.it/MolLoc	yes	no	--	--	Italien	Padova Uni	--	--	no	2	no	yes	yes	yes	yes	0	yes
VisHiC	38	0	http://biit.cs.ut.ee/vishic	yes	no	--	--	Estland	Tartu Uni	--	--	no	2	no	yes	yes	yes	yes	0	yes
Virus Genotyping Tools	1	9	http://bioafrica.mrc.ac.za/rega-genotype/html/	yes	no	Sammlung	--	SÃ¼dafrika	South African Mediacal Research Council	--	2009	--	2	no	--	yes	--	--	0	yes
FASTR3D	38	0	http://bioalgorithm.life.nctu.edu.tw/FASTR3D/	yes	no	--	--	Taiwan	NCTU	--	--	no	2	no	yes	yes	yes	yes	0	yes
HMS-ICS	36	0	http://biodb.jp/	yes	no	Suchmaschine	--	Japan	AIST	2009	--	no	2	no	yes	yes	yes	yes	1	yes
PRASMOT-3D PRO	25	0	http://biodev.extra.cea.fr/rasmot3d/	yes	no	--	--	Frankreich	CEA	--	--	no	2	no	no	yes	--	--	0	yes
GeSBAP	20	0	http://bioinfo.cipf.es/gesbap/	yes	no	--	v1.1.0	Spanien	CIPF	2008	--	yes	3	no	--	yes	--	no	0	yes
SLITHER	30	0	http://bioinfo.mc.ntu.edu.tw/slither/	yes	no	--	--	Taiwan	NTU	--	--	Email	2	no	yes	yes	--	yes	0	--	--	yes
RNAmutants	30	0	http://bioinformatics.bc.edu/clotelab/RNAmutants/	yes	no	--	--	USA	BC	--	--	Email	2	no	yes	yes	--	yes	0	yes
SuperLooper	37	0	http://bioinformatics.charite.de/superlooper/	yes	no	--	v1.0	Deutschland	CharitÃ©	2009	--	no	2	no	yes	yes	yes	yes	0	yes
G-SESAME	1	9	http://bioinformatics.clemson.edu/G-SESAME	yes	no	Sammlung	--	USA	Clemson	--	--	--	2	no	--	yes	--	--	0	yes
PathExpress	39	0	http://bioinfoserver.rsbs.anu.edu.au/utils/PathExpress/	yes	no	--	--	Australien	ANU	2007	--	no	2	no	yes	yes	yes	yes	1	yes
BioMart	24	0	http://biomart.org/	yes	no	--	v0.7	Kanada	OICR/EBI	2009	2009	no	3	yes	--	yes	--	--	6	yes
BioPortal	36	0	http://bioportal.bioontology.org/	yes	no	Datenbank	v2.1	USA	Leland Stanford Junior University	2009	--	no	2	no	--	yes	yes	yes	2	yes
PEP-FOLD	39	0	http://bioserv.rpbs.univ-paris-diderot.fr/PEP-FOLD	yes	no	--	--	Frankreich	Paris 7	2008	2009	no	2	no	yes	yes	yes	yes	1	yes
wwLigCSRre	39	0	http://bioserv.rpbs.univ-paris-diderot.fr/wwLigCSRre.html	yes	no	--	v1.1	Frankreich	Paris 7	2009	2009	no	1	no	yes	yes	yes	yes	0	yes
IC50-to-Ki	38	0	http://botdb.abcc.ncifcrf.gov/toxin/kiConverter.jsp	yes	no	--	--	USA	NCIFCRF	2008	--	no	1	no	yes	yes	yes	yes	1	yes
MMIA	27	0	http://cancer.informatics.indiana.edu/mmia	yes	no	--	--	USA	Indiana Uni	--	2009	no	2	no	yes	yes	--	no	2	--	yes
NNcon	29	0	http://casp.rnet.missouri.edu/nncon.html	yes	no	--	--	USA	Missouri Uni	--	2009	Email	1	no	yes	yes	--	yes	0	yes
MedlineRanker	37	0	http://cbdm.mdc-berlin.de/tools/medlineranker	yes	no	--	--	Deutschland	Max-DelbrÃ¼ck Center	--	--	no	1	no	yes	yes	yes	yes	0	yes
SAM-T08	0	0	http://compbio.soe.ucsc.edu/SAM_T08/T08_query.html	yes	no	--	--	USA	UCSC	--	--	--	--	--	--	--	no	no	2	yes
COPS	35	0	http://cops.services.came.sbg.ac.at/	yes	no	Datenbank	--	Ã–sterreich	Salzburg Uni	--	--	no	3	no	--	yes	yes	yes	0	yes
MNetCSSP	39	0	http://cssp2.sookmyung.ac.kr/	yes	no	--	--	SÃ¼dkorea	Sookmyung	2009	2009	no	2	no	yes	yes	yes	yes	0	yes
FMM	38	0	http://fmm.mbc.nctu.edu.tw/	yes	no	--	--	Taiwan	NCTU	--	--	no	2	no	yes	yes	yes	yes	1	yes
PPISearch	40	0	http://gemdock.life.nctu.edu.tw/ppisearch/	yes	no	--		Taiwan	NCTU	2009	--	no	2	no	yes	yes	yes	yes	0	yes
Gendoo	39	0	http://gendoo.dbcls.jp/	yes	no		v2.1012	Japan	DBCLS	2009	2009	no	1	no	yes	yes	yes	yes	0	yes
GeneCodis	40	0	http://genecodis.dacya.ucm.es/	yes	no	--	v2.0	Spanien	UCM	--	--	no	3	no	yes	yes	yes	yes	0	yes
GoGene	39	0	http://gopubmed.biotec.tu-dresden.de/gogene	yes	no	Suchmaschine	--	Deutschland	Dresden TU	--	--	no	3	no	yes	yes	yes	yes	2	--	yes
3D-DART	40	0	http://haddock.chem.uu.nl/dna/	yes	no	--	v1.1	Niederlande	Utrecht Uni	--	--	no	3	no	yes	yes	yes	yes	0	yes
@TOME-2	0	0	http://haddock.chem.uu.nl/dna/	yes	no	--	v2	Frankreich	CNRS	--	--	no	2	no	yes	yes	no	yes	0	yes
Insignia	29	0	http://insignia.cbcb.umd.edu/	yes	no	Datenbank	--	USA	UMD	--	--	no	2	no	yes	yes	--	--	0	yes
jpHMM	28	0	http://jphmm.gobics.de/	no	Verbindungsfehler	--	--	Deutschland	GÃ¶ttingen Uni	--	2009	Email	2	no	yes	yes	--	yes	0	--	--	--
SEPPA	38	0	http://lifecenter.sgst.cn/seppa/index.php	yes	no	--	--	China	SGST	--	--	no	2	no	yes	yes	yes	yes	0	yes
HotSpot Wizard	31	0	http://loschmidt.chemi.muni.cz/hotspotwizard/	yes	no	--	v1.2	Tschechien	Masaryk Uni	--	--	Email	2	no	yes	yes	--	yes	0	yes
primers4clades	24	0	http://maya.ccg.unam.mx/primers4clades/	yes	no	--	v1.0	Mexiko	UNAM	--	2009	Email	2	no	yes	--	--	--	0	yes
MEME Suite	1	10	http://meme.nbcr.net/	yes	no	Sammlung	v4.1.0	USA	NBCR	--	2009	--	2	--	--	--	--	--	2	yes
MEME Suite	31	0	http://meme.nbcr.net/meme/intro.html	yes	no	--	v4.1.0	USA	NBCR	--	--	Email	2	no	yes	yes	--	yes	2	yes
MGIP	1	10	http://mgip.biology.gatech.edu/	yes	no	Sammlung	v1.6.1	USA	GA Tech	--	--	--	2	no	yes	yes	--	--	0	yes
Microbe Browser	31	0	http://microbe.vital-it.ch/	yes	no	Datenbank	--	Schweiz	EPFL	--	--	no	2	no	yes	no	yes	yes	0	yes
GeneSet2miRNA	29	0	http://mips.helmholtz-muenchen.de/proj/gene2mir/	yes	no	--	--	Deutschland	MIPS	--	2009	no	2	no	yes	yes	--	--	0	yes
MaXIC-Q	19	0	http://ms.iis.sinica.edu.tw/MaXIC-Q	yes	no	--	v0.6.26	Taiwan	Sinica	2008	--	no	3	yes	no	no	--	no	0	yes
PosMed	38	0	http://omicspace.riken.jp/PosMed/	yes	no	--	--	Japan	RIKEN	--	2009	no	2	no	yes	yes	yes	yes	1	--	yes
Orphelia	30	0	http://orphelia.gobics.de/	yes	no	--	--	Deutschland	GÃ¶ttingen Uni	--	--	Email	2	no	yes	yes	--	yes	1	yes
OrthoSelect	24	0	http://orthoselect.gobics.de/	yes	no	--	--	Deutschland	GÃ¶ttingen Uni	--	--	Email	3	no	yes	no	--	--	1	yes
PHEMTO	39	0	http://phemto.orgchm.bas.bg/	yes	no	--		Bulgarien	BAS	--	2009	no	2	no	yes	yes	yes	yes	0	yes
PHOG	40	0	http://phylofacts.berkeley.edu/orthologs/	yes	no	--	v1.0	USA	Berkeley	2009	--	no	2	no	yes	yes	yes	yes	3	yes
INTREPID	34	0	http://phylogenomics.berkeley.edu/intrepid	yes	no	--	v1.0	USA	Berkeley	2009	2009	no	2	no	yes	yes	--	yes	1	yes
COFECO	0	0	http://piech.icu.ac.kr/cofeco	no	Seitenladefehler	--	--	SÃ¼dkorea	ICU	--	--	--	--	--	--	--	no	--	1	--	--	--
SplitPocket	38	0	http://pocket.uchicago.edu/	yes	no	--	--	USA	Chicago Uni	--	--	no	2	no	yes	yes	yes	yes	1	yes
Pomelo II	38	0	http://pomelo2.bioinfo.cnio.es/	yes	no	--	--	Spanien	CNIO	--	--	no	2	no	yes	yes	yes	yes	0	yes
PPREP Suite	29	0	http://prep.unl.edu/	yes	no	--	--	USA	UNL	--	2008	no	2	no	yes	yes	--	--	0	yes
TmPrime	31	0	http://prime.ibn.a-star.edu.sg/	yes	no	--	--	Singapur	A-Star	2009	2009	Email	2	no	yes	yes	--	yes	1	yes
COMPASS	39	0	http://prodata.swmed.edu/compass/compass.php	yes	no	--	--	USA	Southwestern Medical Center	2008	--	no	2	no	yes	yes	yes	yes	0	yes
HorA	22	0	http://prodata.swmed.edu/horaserver/	yes	no	--	--	USA	Southwestern Medical Center	2009	--	Email	2	no	no	yes	--	no	0	yes
ProSMoS	32	0	http://prodata.swmed.edu/ProSMoS/	yes	no	--	--	USA	Southwestern Medical Center	2008	--	no	1	no	yes	yes	--	yes	0	yes
ProteDNA	30	0	http://protedna.csbb.ntu.edu.tw/	yes	no	--	--	Taiwan	NTU	--	--	Email	2	no	yes	yes	--	yes	1	yes
RHYTHM	40	0	http://proteinformatics.de/	yes	no	Suchmaschine	v1.0	Deutschland	CharitÃ©	2007	--	no	2	no	yes	yes	yes	yes	0	--	yes
Protinfo PPC	30	0	http://protinfo.compbio.washington.edu/ppc/	yes	no	--	--	USA	UW	2009	--	Email	1	no	yes	yes	--	yes	1	yes
PubChem BioAssay Service	1	9	http://pubchem.ncbi.nlm.nih.gov/assay/	yes	no	Sammlung	--	USA	NCBI	--	--	--	2	--	--	--	--	--	11	yes
iSARST	38	0	http://sarst.life.nthu.edu.tw/iSARST/	yes	no	--	--	Taiwan	NTHU	--	--	no	2	no	yes	yes	yes	yes	0	yes
seeMotif	38	0	http://seemotif.csie.ntu.edu.tw/	yes	no	--	--	Taiwan	NTU	--	2009	no	2	no	yes	yes	yes	yes	0	yes
SENT	20	0	http://sent.dacya.ucm.es/	yes	no	Suchmaschine	--	Spanien	UCM	--	--	--	2	no	no	yes	--	no	0	yes
SePreSA	38	0	http://sepresa.bio-x.cn/	yes	no	--	--	China	Fudan Uni	--	--	no	2	no	yes	yes	yes	yes	0	yes
SARA	35	0	http://sgu.bioinfo.cipf.es/services/SARA/	yes	no	--	--	Spanien	CIPF	--	--	no	2	no	yes	yes	yes	yes	0	yes
SIB-BLAST	34	0	http://sib-blast.osc.edu/	yes	no	--	--	USA	Ohio State	--	--	no	1	no	yes	yes	yes	yes	0	yes
SITEHOUND-web	38	0	http://sitehound.sanchezlab.org/	yes	no	--	--	USA	Mount Sinai	--	2009	no	2	no	yes	yes	yes	yes	1	yes
SNOW	27	0	http://snow.bioinfo.cipf.es/	yes	no	--	--	Spanien	CIPF	--	--	no	2	no	yes	yes	--	no	0	yes
OmicBrowse	7	0	http://sourceforge.net/projects/omicbrowse/	yes	no	--	v1.3	--	--	--	--	--	--	yes	--	--	--	no	0	yes
SROOGLE	39	0	http://sroogle.tau.ac.il/	yes	no	--	--	Israel	TAU	--	2009	no	3	no	yes	yes	yes	yes	0	yes
QMEAN	38	0	http://swissmodel.expasy.org/qmean	yes	no	--	--	Schweiz	SIB	--	--	no	2	no	yes	yes	yes	yes	1	yes
CVTree	39	0	http://tlife.fudan.edu.cn/cvtree	yes	no	--	v2	China	Fudan Uni	--	--	no	2	no	yes	yes	yes	yes	0	yes
HHomp	38	0	http://toolkit.tuebingen.mpg.de/hhomp	yes	no	--	--	Deutschland	MPI Entwicklungsbiologie	--	--	no	2	no	yes	yes	yes	yes	0	yes
TOPCONS	39	0	http://topcons.net/	yes	no	--	--	Schweden	Stockholm Uni	--	--	no	3	no	yes	yes	yes	yes	1	yes
ToppGene Suite	1	11	http://toppgene.cchmc.org/	yes	no	Sammlung	--	USA	CCHMC	2009	--	--	3	no	yes	--	--	--	1	yes
UniPrime2	27	0	http://uniprime.batlab.eu/	yes	no	--	v1.18	Irland	UCD	--	--	Email	3	no	yes	yes	--	no	1	yes
VisANT	31	0	http://visant.bu.edu/	yes	no	--	v3.63	USA	BU	2009	2008	no	2	no	yes	yes	--	--	3	yes
Web 3DNA	38	0	http://w3dna.rutgers.edu/	yes	no	--	--	USA	Rutgers	--	--	no	2	no	yes	yes	yes	yes	1	yes
miRanalyzer	33	0	http://web.bioinformatics.cicbiogune.es/microRNA/	yes	no	--	--	Spanien	CIC bioGUNE	--	--	no	3	no	yes	yes		yes	0	yes
WebLab	1	10	http://weblab.cbi.pku.edu.cn/	yes	no	Sammlung	--	China	Peking Uni	2009	--	--	2	--	--	yes	--	--	0	yes
Pscan	38	0	http://www.beaconlab.it/pscan	yes	no	--	--	Italien	Mailand Uni	--	--	no	2	no	yes	yes	yes	yes	0	yes
BioBIKE	22	0	http://www.biobike.org/	yes	no	Programmiersprache	--	USA	Stanford	--	2009	no	1	no	--	yes	--	no	0	yes
WebGMAP	31	0	http://www.bioinfolab.org/software/webgmap	yes	no	--	v1.0	USA	MUOhio			no	2	no	yes	yes	--	--	0	yes
ProGMap	35	0	http://www.bioinformatics.nl/progmap	yes	no	Suchmaschine	--	Niederlande	Wageningen Uni	--	--	no	2	no	yes	yes	yes	yes	2	yes
d-Omix	1	9	http://www.biotec.or.th/isl/Domix	yes	no	Sammlung	--	Thailand	BIOTEC	--	--	--	2	no	yes	yes	--	--	0	yes
ClanTox	36	0	http://www.clantox.cs.huji.ac.il/	yes	no	--	--	Israel	HUJI	2009	--	no	3	no	no	yes	yes	yes	0	yes
Torque	39	0	http://www.cs.tau.ac.il/~bnet/torque.html	yes	no	--	--	Israel	TAU	--	2009	no	3	no	yes	yes	yes	yes	0	yes
DASMIweb	38	0	http://www.dasmiweb.de/	yes	no	--	--	Deutschland	MPI Informatik	--	--	no	2	no	yes	yes	yes	yes	0	yes
OptiTope	39	0	http://www.epitoolkit.org/optitope	yes	no	--	--	Deutschland	TÃ¼bingen Uni	--	--	no	3	no	yes	yes	yes	yes	1	yes
GeNMR	30	0	http://www.genmr.ca/	yes	no	--	--	Kanada	Alberta Uni	--	2009	Email	2	no	yes	yes	--	yes	0	yes
GenoCAD	40	0	http://www.genocad.org/	yes	no	--	Beta	USA	Virginia Tech	--	--	no	3	no	yes	yes	yes	yes	0	yes
HomozygosityMapper	35	0	http://www.homozygositymapper.org/	yes	no	--	--	Deutschland	CharitÃ©	--	2009	no	2	no	yes	yes	yes	--	0	yes
PhyloPars	38	0	http://www.ibi.vu.nl/programs/phylopars/	yes	no	--	--	Niederlande	Amsterdam Uni	--	--	no	2	no	yes	yes	yes	yes	0	yes
webPRC	38	0	http://www.ibi.vu.nl/programs/prcwww/	yes	no	--	--	Niederlande	Amsterdam Uni	--	--	no	2	no	yes	yes	yes	yes	0	yes
LitInspector	40	0	http://www.litinspector.org/	yes	no	Datenbank	v1.3	Deutschland	Genomatrix Software GmbH	--	2009	no	3	no	yes	yes	yes	yes	0	yes
MetaboAnalyst	38	0	http://www.metaboanalyst.ca/	yes	no	--	--	Kanada	Alberta Uni	--	--	no	2	no	yes	yes	yes	yes	1	yes
mGene.web	30	0	http://www.mgene.org/web	yes	no	--		Deutschland	MPI Entwicklungsbiologie	--	--	no	2	no	yes	yes	--	--	1	yes
DIANA-microT	32	0	http://www.microrna.gr/microT	yes	no	Datenbank	v3.0	Griechenland	NTUA	--	--	no	2	no	yes	no	yes	yes	4	yes
MirZ	1	8	http://www.mirz.unibas.ch/	yes	no	Sammlung	--	Schweiz	Basel Uni	--	2009	--	1	no	--	--	--	--	0	yes
CentroidFold	39	0	http://www.ncrna.org/centroidfold/	yes	no	--	--	Japan	NCRNA	--	--	no	3	no	yes	yes	yes	yes	0	yes
RegAnalyst	0	0	http://www.nii.ac.in/~deepak/RegAnalyst	no	Server nicht gefunden	--	--	Indien	--	--	--	--	--	--	--	--	no	no	0	--	--	--
SNPinfo	0	0	http://www.niehs.nih.gov/snpinfo	yes	no	--	--	USA	NIH	--	--	--	--	--	--	--	no	no	0	yes
PLecDom	38	0	http://www.nipgr.res.in/plecdom.html	yes	no	--	--	Indien	NIPGR	--	2008	no	2	no	yes	yes	yes	yes	0	yes
WhichGenes	8	0	http://www.whichgenes.org/api/	yes	no	--	--	Spanien	--	--	--	--	1	--	--	--	--	no	0	yes
SALAMI	31	0	http://www.zbh.uni-hamburg.de/salami	yes	no	--	--	Deutschland	Hamburg Uni	2009	--	Email	2	no	yes	yes	--	yes	0	yes
ProteinCCD	35	0	http://xtal.nki.nl/ccd	yes	no	--	--	Niederlande	NKI	--	2009	no	2	no	yes	yes	yes	yes	0	yes
AutoClass@IJM	0	0	http://ytat2.ijm.univ-paris-diderot.fr/AutoclassAtIJM.html	yes	no	--	--	Frankreich	Paris 7	--	--	--	--	--	--	--	no	no	0	yes
PLAN2L	40	0	http://zope.bioinfo.cnio.es/plan2l	yes	no	Suchmaschine	--	Spanien	CNIO	2009	--	no	3	no	yes	yes	yes	yes	1	yes
iCODEHOP	0	0	https://icodehop.cphi.washington.edu/i-codehop-context/Welcome	yes	no	--	v1.0	USA	UW	--	--	no	2	no	no	yes	no	yes	1	yes
