# Supplementary material for: Persistence and Availability of Web Services in Computational Biology
Source: PLoS One. 2011 Sep 22;6(9):e24914. doi: 10.1371/journal.pone.0024914 (PMC3178567; doi:10.1371/journal.pone.0024914)
Supplement: Dataset S2 — Original Web addresses from abstracts. This list contains the original Web addresses extracted from the abstracts of the NAR Web Server Issues. (XLS) [file pone.0024914.s002.xls]

## Sheet: URLs-2003
http://BioInfo.PL/Meta Detection of reliable and unexpected protein fold predictions using 3D-Jury
http://cubic.bioc.columbia.edu/services/DSSPcont DSSPcont: continuous secondary structure assignments for proteins
http://protinfo.compbio.washington.edu PROTINFO: secondary and tertiary protein structure prediction
http://cubic.bioc.columbia.edu/pp/ The PredictProtein server
http://genesilico.pl/meta GeneSilico protein structure prediction meta-server
http://cubic.bioc.columbia.edu/meta/ META-PP: single interface to crucial prediction servers
http://cubic.bioc.columbia.edu/eva/ EVA: evaluation of protein structure prediction servers
http://redpoll.pharmacy.ualberta.ca/vadar VADAR: a web server for quantitative evaluation of protein structure quality
http://genopole.toulouse.inra.fr/ESPript ESPript/ENDscript: extracting and rendering sequence and 3D information from atomic structures of proteins
http://feature.stanford.edu/webfeature/ WebFEATURE: an interactive web tool for identifying and visualizing functional sites on macromolecular structures
http://3matrix.stanford.edu 3<FONT SIZE=-2>MATRIX</FONT> and 3<FONT SIZE=-2>MOTIF</FONT>: a protein structure visualization system for conserved sequence motifs
http://3motif.stanford.edu 3<FONT SIZE=-2>MATRIX</FONT> and 3<FONT SIZE=-2>MOTIF</FONT>: a protein structure visualization system for conserved sequence motifs
http://www.bioinf.man.ac.uk/dbbrowser/motif3d/motif3d.html Motif3D: relating protein sequence motifs to 3D structure
http://cubic.bioc.columbia.edu/db/LOC3d/ LOC3D: annotate sub-cellular localization for protein structures
http://pints.embl.de Annotation in three dimensions. PINTS: Patterns in Non-homologous Tertiary Structures
http://www.mrc-lmb.cam.ac.uk/genomes/nci/ NCI: a server to identify non-canonical interactions in protein structures
http://projects.villa-bosch.de/mcm/software/molsurfer MolSurfer: a macromolecular interface navigator
http://cast.engr.uic.edu CASTp: Computed Atlas of Surface Topography of proteins
http://dicsoft2.physics.iisc.ernet.in/sem/ SEM (Symmetry Equivalent Molecules): a web-based GUI to generate and visualize the macromolecules
http://144.16.71.11/sem/ SEM (Symmetry Equivalent Molecules): a web-based GUI to generate and visualize the macromolecules
http://www.enzim.hu/servers.html Servers for sequence&#150structure relationship analysis and prediction
http://mathbio.nimr.mrc.ac.uk/~ffranca/POPS POPS: a fast algorithm for solvent accessible surface areas at atomic and residue level
http://www.cs.vu.nl/~ibivu/programs/popswww POPS: a fast algorithm for solvent accessible surface areas at atomic and residue level
http://biunit.aist-nara.ac.jp/matras MATRAS: a program for protein 3D structure comparison
http://PredictionCenter.llnl.gov/local/lga LGA: a method for finding 3D similarities in protein structures
http://salilab.org Tools for comparative protein structure modeling and analysis
http://swissmodel.expasy.org SWISS-MODEL: an automated protein homology-modeling server
http://www.cbi.cnptia.embrapa.br STING Millennium: a web-based suite of programs for comprehensive and simultaneous analysis of protein structure and sequence
http://mirrors.rcsb.org/SMS STING Millennium: a web-based suite of programs for comprehensive and simultaneous analysis of protein structure and sequence
http://trantor.bioc.columbia.edu/SMS STING Millennium: a web-based suite of programs for comprehensive and simultaneous analysis of protein structure and sequence
http://pbil.univ-lyon1.fr Integrated databanks access and sequence/structure analysis services at the PBIL
http://www.cmbi.kun.nl/NR/servers/html/ NRSAS: Nuclear Receptor Structure Analysis Servers
http://cluster.physics.iisc.ernet.in/ssep/ SSEP: secondary structural elements of proteins
http://144.16.71.148/ssep/ SSEP: secondary structural elements of proteins
http://www.bioinfo.rpi.edu/applications/mfold Mfold web server for nucleic acid folding and hybridization prediction
http://www.RNAsoft.ca RNAsoft: a suite of RNA secondary structure prediction and design software tools
http://www.daimi.au.dk/~compbio/pfold Pfold: RNA secondary structure prediction using stochastic context-free grammars
http://rna.tbi.univie.ac.at/ Vienna RNA secondary structure server
http://wilab.inha.ac.kr/pseudoviewer2/ P<FONT SIZE=-2>SEUDO</FONT>V<FONT SIZE=-2>IEWER</FONT>2: visualization of RNA pseudoknots of any type
http://wb2x01.biozentrum.uni-wuerzburg.de/ A software tool-box for analysis of regulatory RNA elements
http://bioinfo.cis.nctu.edu.tw/service/gprm/ GPRM: a genetic programming approach to finding common RNA secondary structure elements
http://ndbserver.rutgers.edu/services/ Tools for the automatic identification and classification of RNA base pairs
http://ndbserver.rutgers.edu/atlas/ Tools for the automatic identification and classification of RNA base pairs
http://gepas.bioinfo.cnio.es GEPAS: a web-based resource for microarray gene expression data analysis
http://bioinfo.cnio.es GEPAS: a web-based resource for microarray gene expression data analysis
http://www.esat.kuleuven.ac.be/inclusive INCLUSive: a web portal and service registry for microarray and regulatory sequence analysis
http://www.cbs.dtu.dk/services/GenePublisher GenePublisher: automated analysis of DNA microarray data
http://bioinfo.mbb.yale.edu/expressyourself ExpressYourself: a modular platform for processing and visualizing microarray data
http://biosun1.harvard.edu/complab/chipinfo/ ChipInfo: software for extracting gene annotation and gene ontology information for microarray analysis
http://bussemaker.bio.columbia.edu/reduce/ REDUCE: an online tool for inferring <I>cis</I>-regulatory elements and transcriptional module activities from microarray data
http://www.cbs.dtu.dk/services/OligoWiz/ Design of oligonucleotides for microarrays and perspectives for design of multi-transcriptome arrays
http://www.ebi.ac.uk/clustalw/ Multiple sequence alignment with the Clustal series of programs
http://imtech.res.in/~anand/cloure.html CLOURE: Clustal Output Reformatter	a program for reformatting ClustalX/ClustalW outputs for SNP analysis and molecular systematic
http://igs-server.cnrs-mrs.fr/Tcoffee/ Tcoffee@igs: a web server for computing	evaluating and combining multiple sequence alignments
http://bio.math.berkeley.edu/slam SLAM web server for comparative gene finding and alignment
http://www.hgmp.mrc.ac.uk/Registered/Webapp/theatre/ Theatre: a software tool for detailed comparative analysis and visualization of genomic sequence
http://bio.cse.psu.edu/ MultiPipMaker and supporting tools: alignments and analysis of multiple genomic DNA sequences
http://baboon.math.berkeley.edu/mavid/ MAVID multiple alignment server
http://bio.cse.psu.edu/ EnteriX 2003: visualization tools for genome alignments of Enterobacteriaceae
http://origin.bic.nus.edu.sg/mgalign/mgalignit MGAlignIt: a web service for the alignment of mRNA/EST and genomic sequences
http://www.cbs.dtu.dk/services/RevTrans/ RevTrans: multiple alignment of coding DNA from aligned amino acid sequences
http://www.softberry.com/berry.phtml?topic=promh PromH: promoters identification using orthologous genomic sequences
http://sdmc.lit.org.sg/FIE2.0 FIE2: a program for the extraction of genomic DNA sequences around the start and translation initiation site of human genes
http://biowulf.bu.edu/zlab/PromoSer/ PromoSer: a large-scale mammalian promoter and transcription start site identification service
http://sdmc.lit.org.sg/promoter/dragonGSF1_0/genestart.htm Dragon Gene Start Finder identifies approximate locations of the 5' ends of genes
http://www.biobase.de/ Dragon Gene Start Finder identifies approximate locations of the 5' ends of genes
http://nekrut.uchicago.edu/etope/ ETOPE: evolutionary test of predicted exons
http://exon.cshl.edu/ESE/ ESEfinder: a web resource to identify exonic splicing enhancers
http://rocky.bms.umist.ac.uk/SiteSeer/ SiteSeer: visualisation and analysis of transcription factor binding sites in nucleotide sequences
http://www.gene-regulation.com/pub/programs.html#match MATCH<SUP>TM</SUP>: a tool for searching transcription factor binding sites in DNA sequences
http://compel.bionet.nsc.ru/Match/Match.html MATCH<SUP>TM</SUP>: a tool for searching transcription factor binding sites in DNA sequences
http://www.biobase.de MATCH<SUP>TM</SUP>: a tool for searching transcription factor binding sites in DNA sequences
http://bayesweb.wadsworth.org/gibbs/gibbs.html Gibbs Recursive Sampler: finding transcription factor binding sites
http://www.bioinfo.rpi.edu/applications/bayesian/gibbs/gibbs.html Gibbs Recursive Sampler: finding transcription factor binding sites
http://bayesweb.wadsworth.org/gibbs/bernoulli.html Gibbs Recursive Sampler: finding transcription factor binding sites
http://www.bioinfo.rpi.edu/applications/bayesian/gibbs/manual/bernoulli.html Gibbs Recursive Sampler: finding transcription factor binding sites
http://bio.cs.washington.edu/software.html YMF: a program for discovery of novel transcription factor binding sites by statistical overrepresentation
http://trantor.bioc.columbia.edu/Target_Explorer/ Target Explorer: an automated tool for the identification of new target genes for a specified set of transcription factors
http://rsat.ulb.ac.be/rsat Regulatory Sequence Analysis Tools
http://www.plantgdb.org/cgi-bin/GeneSeqer.cgi GeneSeqer@PlantGDB: gene structure prediction in plant genomes
http://www.tigr.org/software GlimmerM	Exonomy and Unveil: three <I>ab initio</I> eukaryotic genefinders
http://sdmc.lit.org.sg/ERE-V2/index Dragon ERE Finder version 2: a tool for accurate detection and analysis of estrogen response elements in vertebrate genomes
http://bighost.area.ba.cnr.it/BIG/PatSearch/ PatSearch: a program for the detection of patterns and structural motifs in nucleotide sequences
http://www.psort.org PSORT-B: improving protein subcellular localization prediction for Gram-negative bacteria
http://www.isrec.isb-sib.ch/ssa/ Signal search analysis server
http://www.jenner.ac.uk/MHCPred MHCPred: a server for quantitative prediction of peptide&#150MHC binding
http://elm.eu.org/ ELM server: a new resource for investigating short functional sites in modular eukaryotic proteins
http://mendel.imp.univie.ac.at/ Prediction of lipid posttranslational modifications and localization signals from protein sequences: big-<IMG SRC="/math/large/Pi.gif" ALT="{Pi}" BORDER="0">	NMT and PTS1
http://scansite.mit.edu Scansite 2.0: proteome-wide prediction of cell signaling interactions using short sequence motifs
http://cubic.bioc.columbia.edu/services/tmh_benchmark/ Static benchmarking of membrane helix predictions
http://cbcsrv.watson.ibm.com/Tspd.html The web server of IBM's Bioinformatics and Pattern Discovery group
http://cbcsrv.watson.ibm.com/Annotations/ The web server of IBM's Bioinformatics and Pattern Discovery group
http://www.lsi.upc.es/~alggen Identification of patterns in biological sequences at the ALGGEN server: PROMO and MALGEN
http://www.nii.res.in/searchpks.html SEARCHPKS: a program for detection and analysis of polyketide synthase domains
http://perl.idmb.tamu.edu/mak.htm MAK	a computational tool kit for automated MITE analysis
http://zlab.bu.edu/cluster-buster/ Cluster-Buster: finding dense clusters of motifs in DNA sequences
http://stat.genopole.cnrs.fr/SIC/ SIC: a tool to detect short inverted segments in a biological sequence
http://www.loria.fr/mreps/ <TT>mreps</TT>: efficient and flexible detection of tandem repeats in DNA
http://stat.genopole.cnrs.fr/SPA/ SPA: simple web tool to assess statistical significance of DNA patterns
http://bioportal.weizmann.ac.il/tracts/tracts.html TRACTS: a program to map oligopurine.oligopyrimidine and other binary DNA tracts
http://bip.weizmann.ac.il/miwbin/servers/tracts TRACTS: a program to map oligopurine.oligopyrimidine and other binary DNA tracts
http://www.icgeb.trieste.it/dna/ DNA analysis servers: plot.it	bend.it	model.it and IS
http://tools.neb.com/NEBcutter NEBcutter: a program to cleave DNA with restriction enzymes
http://www.neb.com/rebase NEBcutter: a program to cleave DNA with restriction enzymes
http://jing.cz3.nus.edu.sg/cgi-bin/svmprot.cgi SVM-Prot: web-based support vector machine software for functional classification of a protein from its primary sequence
http://www.jenner.ac.uk/BPROMPT BPROMPT: a consensus server for membrane protein prediction
http://globplot.embl.de GlobPlot: exploring protein sequences for globularity and disorder
http://cbm.bio.uniroma2.it/ispot iSPOT: a web tool to infer the interaction specificity of families of protein modules
http://goblet.molgen.mpg.de Automated Gene Ontology annotation for anonymous sequence data
http://genome.dkfz-heidelberg.de ESTAnnotator: a tool for high throughput EST annotation
http://igs-server.cnrs-mrs.fr/phydbac/ Phydbac (phylogenomic display of bacterial genes): an interactive resource for the annotation of bacterial genomes
http://www.genoscope.cns.fr/agc/tools/amigene/index.html AMIGene: Annotation of MIcrobial Genes
http://www.wdcm.org/AHMII/ahmii.html AHMII: Agent to Help Microbial Information Integration
http://sky.bsd.uchicago.edu/DNannotator.htm DNannotator: annotation software tool kit for regional genomic sequences
http://bioverse.compbio.washington.edu Bioverse: functional	structural and contextual annotation of proteins and proteomes
http://genopole.toulouse.inra.fr/bioinfo/FrameD/FD FrameD: a flexible program for quality check and gene prediction in prokaryotic genomes and noisy matured eukaryotic sequences
http://genopole.toulouse.inra.fr/bioinfo/eugene/EuGeneHom/cgi-bin/EuGeneHom.pl E<FONT SIZE=-1>U</FONT>G&Egrave<FONT SIZE=-1>NE</FONT>'H<FONT Â SIZE=-1>OM</FONT>: a generic similarity-based gene finder using multiple homologous sequences
http://probemer.cs.loyola.edu PROBEmer: a web-based software tool for selecting optimal DNA oligos
http://dbb.nhri.org.tw/primer/ Primer Design Assistant (PDA): a web-based primer design tool
http://biocore.unl.edu/primer/primerPI.html DePIE: Designing Primers for Protein Interaction Experiments
http://lnatools.com/ OligoDesign: optimal design of LNA (locked nucleic acid) oligonucleotide capture probes for gene expression profiling
http://blocks.fhcrc.org/codehop.html CODEHOP (COnsensus-DEgenerate Hybrid Oligonucleotide Primer) PCR primer design
http://blocks.fhcrc.org CODEHOP (COnsensus-DEgenerate Hybrid Oligonucleotide Primer) PCR primer design
http://bibiserv.techfak.uni-bielefeld.de RNA-related tools on the Bielefeld Bioinformatics Server
http://sirw.embl.de/ SIRW: a web server for the Simple Indexing and Retrieval System that combines sequence motif searches with keyword searches
http://vortex.cs.wayne.edu/Projects.html Onto-Tools	the toolkit of the modern biologist: Onto-Express	Onto-Compare	Onto-Design and Onto-Translate
http://www.embnet.org Swiss EMBnet node web server
http://www.ch.embnet.org Swiss EMBnet node web server
http://www.expasy.org ExPASy: the proteomics server for in-depth protein knowledge and analysis
http://cubic.bioc.columbia.edu/services/uniqueprot UniqueProt: creating representative protein sequence sets
http://blast2srs.embl.de/ BLAST2SRS	a web server for flexible retrieval of related protein sequences in the SWISS-PROT and SPTrEMBL databases
http://blast.wustl.edu WU-Blast2 server at the European Bioinformatics Institute
http://www.ebi.ac.uk/blast2/ WU-Blast2 server at the European Bioinformatics Institute
http://functionalgenomics.de/ontogate/ OntoBlast function: from sequence similarities directly to potential functional annotations by Â ontology terms
http://BioInfo.PL/Meta/ ORFeus: detection of distant homology using sequence profiles and predicted secondary structure
http://www.proweb.org/parsesnp/ P<FONT SIZE=-1>ARSESNP</FONT>: a tool for the analysis of nucleotide polymorphisms
http://blocks.fhcrc.org/sift/SIFT.html SIFT: predicting amino acid changes that affect protein function
http://moulon.inra.fr/~bioinfo/ ActionMap: a web-based software that automates loci assignments to framework maps
http://wings.buffalo.edu/gsa/dna/dk/WEBTHERMODYN/ WEB-THERMODYN: sequence analysis software for profiling DNA helical stability
http://www.ebi.ac.uk/newt/ NEWT	a new taxonomy portal
http://longitude.weizmann.ac.il/rMotif/ Comprehensive quantitative analyses of the effects of promoter sequence elements on mRNA transcription
http://igbmc.u-strasbg.fr/PipeAlign/ PipeAlign: a new toolkit for protein family analysis
http://cubic.bioc.columbia.edu/services/NORSp/ NORSp: predictions of long regions without regular secondary structure
http://www.xml.nig.ac.jp/ Biological SOAP servers and web services provided by the public sequence data bank
http://bio.cs.washington.edu/software.html FootPrinter: a program designed for phylogenetic footprinting
http://pbga.pasteur.fr/GeneFizz GeneFizz: a web tool to compare genetic (coding/non-coding) and physical (helix/coil) segmentations of DNA sequences. Gene discovery and evolutionary perspectives
http://www.genafor.org/ Geno2pheno: estimating phenotypic drug resistance from HIV-1 genotypes
http://icb.mssm.edu/crt/RbDe Building protein diagrams on the web with the residue-based diagram editor RbDe
http://fasta.bioch.virginia.edu/crp CRP: Cleavage of Radiolabeled Phosphoproteins
http://prodoric.tu-bs.de/proteomics.php JVirGel: calculation of virtual two-dimensional protein gels
http://www.bork.embl-heidelberg.de/xplormed/ Update on XplorMed: a web server for exploring scientific literature

## Sheet: URLs-2004
http://www.ebi.ac.uk/services Public web-based services from the European Bioinformatics Institute
http://cbcsrv.watson.ibm.com/Tspd.html The web server of IBM's Bioinformatics and Pattern Discovery group: 2004 update
http://cbcsrv.watson.ibm.com/Annotations/ The web server of IBM's Bioinformatics and Pattern Discovery group: 2004 update
http://www.pubcrawler.ie PubCrawler: keeping up comfortably with PubMed and GenBank
http://www.ncbi.nlm.nih.gov/BLAST/ BLAST: at the core of a powerful and diverse set of sequence analysis tools
http://darwin.nmsu.edu/cgi-bin/blast_filter.cgi BLAST Filter and GraphAlign: rule-based formation and analysis of sets of related DNA and protein sequences
http://darwin.nmsu.edu/cgi-bin/graph_align.cgi BLAST Filter and GraphAlign: rule-based formation and analysis of sets of related DNA and protein sequences
http://bibiserv.TechFak.Uni-Bielefeld.DE/dialign/ DIALIGN: multiple DNA and protein sequence alignment at BiBiServ
http://igs-server.cnrs-mrs.fr/Tcoffee/ 3DCoffee@igs: a web server for combining sequences and structures into a multiple sequence alignment
http://dialign.gobics.de/chaos-dialign-submission The CHAOS/DIALIGN WWW server for multiple alignment of genomic sequences
http://cvtree.cbi.pku.edu.cn CVTree: a phylogenetic tree reconstruction tool based on whole genomes
http://wavis.img.cas.cz WAViS server for handling	visualization and presentation of multiple alignments of nucleotide or amino acids sequences
http://structure.bu.edu/cgi-bin/consensus/consensus.cgi Consensus alignment server for reliable comparative modeling with distant templates
http://bunsei2.med.u-tokai.ac.jp:8080/~ohtsuka/cds_finding.html CHOP: visualization of &#145wobbling&#146 and isolation of highly conserved regions from aligned DNA sequences
http://www.microbial-pathogenesis.org/stickwrld/ MAVL and StickWRLD: visually exploring relationships in nucleic acid sequence alignments
http://www.microbial-pathogenesis.org/stickwrld/tutorial/sticktut2.html MAVL and StickWRLD: visually exploring relationships in nucleic acid sequence alignments
http://wwwmgs.bionet.nsc.ru/mgs/programs/crasp/ CRASP: a program for analysis of coordinated substitutions in multiple alignments of protein sequences
http://advice.i2r.a-star.edu.sg ADVICE: Automated Detection and Validation of Interaction by Co-Evolution
http://interweaver.i2r.a-star.edu.sg/ InterWeaver: interaction reports for discovering potential protein interaction partners with online evidence
http://proteminer.csie.ntu.edu.tw/ ProteMiner-SSM: a web server for efficient analysis of similar protein tertiary substructures
http://p4.sbl.bc.sinica.edu.tw/proteminer/ ProteMiner-SSM: a web server for efficient analysis of similar protein tertiary substructures
http://www.pathblast.org/ PathBLAST: a tool for alignment of protein interaction networks
http://interviewer.inha.ac.kr/ WebInterViewer: visualizing and analyzing molecular interaction networks
http://nrc.bu.edu/cluster ClusPro: a fully automated algorithm for protein&#150protein docking
http://www.rcsb.org/pdb/ ClusPro: a fully automated algorithm for protein&#150protein docking
http://cemc.sdsc.edu CE-MC: a multiple protein structure alignment server
http://www.netasa.org/qgrid/index.html Qgrid: clustering tool for detecting charged and hydrophobic regions in proteins
http://www.ncbi.nlm.nih.gov/sutils/e-pcr A web server for performing electronic PCR
http://cluster-1.mpi-cbg.de/Deqor/deqor.html DEQOR: a web-based tool for the design and quality control of siRNAs
http://www.cellbio.unige.ch/RNAi.html TROD: T7 RNAi Oligo Designer
http://design.RNAi.jp/ siDirect: highly effective	target-specific siRNA design software for mammalian RNA interference
http://jura.wi.mit.edu/bioc/siRNA siRNA Selection Server: an automated siRNA oligonucleotide prediction server
http://sfold.wadsworth.org <I>S</I>fold web server for statistical folding and rational design of nucleic acids
http://www.bioinfo.rpi.edu/applications/sfold <I>S</I>fold web server for statistical folding and rational design of nucleic acids
http://bioinfo.lifl.fr/carnac CARNAC: folding families of related RNAs
http://cic.cs.wustl.edu/RNA/ ILM: a web server for predicting RNA secondary structures with pseudoknots
http://rna.cbi.pku.edu.cn RDfolder: a web server for prediction of RNA secondary structure
http://www.biozentrum.uni-wuerzburg.de/bioinformatik/Riboswitch/ Riboswitch finder&#151a tool for identification of riboswitch RNAs
http://tagc.univ-mrs.fr/erpin/ The ERPIN server: an interface to profile-based RNA motif identification
http://pda.uab.es/ PDA: a pipeline to explore and estimate polymorphism in large DNA databases
http://www.SNPbox.org SNPbox: web-based high-throughput primer design from gene to genome
http://www.ncbi.nlm.nih.gov/mhc/sbt.cgi?cmd=main The sequencing-based typing tool of dbMHC: typing highly polymorphic gene sequences
http://berry.engin.umich.edu/gene2oligo/ Gene2Oligo: oligonucleotide design for <I>in vitro</I> gene synthesis
http://genome.ewha.ac.kr/ECgene/ASmodeler/ ASmodeler: gene modeling of alternative splicing from genomic alignment of mRNA	EST and protein sequences
http://genes.mit.edu/burgelab/rescue-ese/ RESCUE-ESE identifies candidate exonic splicing enhancers in vertebrate exons
http://biowulf.bu.edu/zlab/PromoSer PromoSer: improvements to the algorithm	visualization and accessibility
http://mscan.cgb.ki.se/cgi-bin/MSCAN MSCAN: identification of functional clusters of transcription factor binding sites
http://www.pesolelab.it Weeder Web: discovery of transcription factor binding sites in a set of sequences from co-regulated genes
http://seqmotifs.stanford.edu A suite of web-based programs to search for transcriptional regulatory motifs
http://wwwmgs.bionet.nsc.ru/mgs/programs/sitecon/ SITECON: a tool for detecting conservative conformational and physicochemical properties in transcription factor binding site alignments and for site recognition
http://zlab.bu.edu/CARRIE-web CARRIE web service: automated transcriptional regulatory network inference and interactive analysis
http://rvista.dcode.org/ rVISTA 2.0: evolutionary analysis of transcription factor binding sites
http://ekhidna.biocenter.helsinki.fi:9801/pobo POBO	transcription factor binding site verification with bootstrapping
http://research.i2r.a-star.edu.sg/DRAGON/TFAM/ Dragon TF Association Miner: a system for exploring transcription factor associations through text-mining
http://zlab.bu.edu/SeqVISTA/web.jnlp SeqVISTA: a new module of integrated computational tools for studying transcriptional regulation
http://zlab.bu.edu/SeqVISTA SeqVISTA: a new module of integrated computational tools for studying transcriptional regulation
http://pupasnp.bioinfo.cnio.es PupaSNP Finder: a web tool for finding SNPs with putative effect at transcriptional level
http:/www.phylofoot.org/consite ConSite: web-based prediction of regulatory elements using cross-species comparison
http://creme.dcode.org CREME: <I>Cis</I>-Regulatory Module Explorer for the human genome
http://giscompute.gis.a-star.edu.sg/~vega/BEARR1.0/ BEARR: Batch Extraction and Analysis of <I>cis</I>-Regulatory Regions
http://www.dkfz.de/spec/projekte/fragments/ GlycoFragment and GlycoSearchMS: web tools to support the interpretation of mass spectra of complex carbohydrates
http://www.dkfz.de/spec/glycosciences.de/sweetdb/ms/ GlycoFragment and GlycoSearchMS: web tools to support the interpretation of mass spectra of complex carbohydrates
http://glycan.genome.ad.jp KCaM (KEGG Carbohydrate Matcher): a software tool for analyzing the structures of carbohydrate sugar chains
http://www-gsd.lbl.gov/vista/ VISTA: computational tools for comparative genomics
http://ecrbrowser.dcode.org ECR Browser: a tool for visualizing and accessing data from comparisons of multiple vertebrate genomes
http://bioinfo2.ugr.es/IsoF/isofinder.html IsoFinder: computational prediction of isochores in genome sequences
http://bioinfo2.ugr.es/isochores/ IsoFinder: computational prediction of isochores in genome sequences
http://genome.cse.ucsc.edu/ IsoFinder: computational prediction of isochores in genome sequences
http://www.medinfopoli.polimi.it/GFINDer/ <I>GFINDer</I>: Genome Function INtegrated Discoverer through dynamic annotation	statistical analysis	and mining
http://bibiserv.techfak.uni-bielefeld.de/e2g/ e2g: an interactive web-based server for efficiently mapping large EST and cDNA sets to genomic sequences
http://bibiserv.TechFak.Uni-Bielefeld.DE/agenda/ AGenDA: gene prediction by cross-species sequence comparison
http://augustus.gobics.de AUGUSTUS: a web server for gene finding in eukaryotes
http://goblet.molgen.mpg.de GOblet: a platform for Gene Ontology annotation of anonymous sequence data
http://www.cdfd.org.in/predictregulon/ PredictRegulon: a web server for the prediction of the regulatory protein binding sites and operons in prokaryote genomes
http://www.predictprotein.org The PredictProtein server
http://www.ncbi.nlm.nih.gov/Structure/cdd/wrpsb.cgi CD-Search: protein domain annotations on the fly
http://myhits.isb-sib.ch MyHits: a new interactive resource for protein annotation and domain identification
http://igs-server.cnrs-mrs.fr/phydbac/ Phydbac2: improved inference of gene function using interactive phylogenomic profiling and chromosomal location analysis
https://prosightptm.scs.uiuc.edu/ ProSight PTM: an integrated environment for protein identification and characterization by top-down mass spectrometry
http://wwwmgs.bionet.nsc.ru/mgs/programs/recon/ RECON: a program for prediction of nucleosome formation potential
http://research.i2r.a-star.edu.sg/CysView/ CysView: protein classification based on cysteine pairing patterns
http://proline.bic.nus.edu.sg/sdpmod SDPMOD: an automated comparative modeling server for small disulfide-bonded proteins
http://www.doe-mbi.ucla.edu/Services/GDAP GDAP: a web tool for genome-wide protein disulfide bond prediction
http://www.cs.ualberta.ca/~bioinfo/PA/ Proteome Analyst: custom predictions with explanations in a web-based tool for high-throughput proteome annotations
http://mitopred.sdsc.edu MITOPRED: a web server for the prediction of mitochondrial proteins
http://www.predisi.de PrediSi: prediction of signal peptides and their cleavage positions
http://bioinformatics.biol.uoa.gr/PRED-GPCR PRED-GPCR: GPCR recognition and family classification server
http://www.soe.ucsc.edu/research/compbio/gpcr/ GPCRpred: an SVM-based method for prediction of families and subfamilies of G-protein coupled receptors
http://www.imtech.res.in/raghava/gpcrpred/ GPCRpred: an SVM-based method for prediction of families and subfamilies of G-protein coupled receptors
http://www.imtech.res.in/raghava/gpcrpred/info.html GPCRpred: an SVM-based method for prediction of families and subfamilies of G-protein coupled receptors
http://bioinfo.si.hirosaki-u.ac.jp/~ConPred2/ ConPred II: a consensus prediction method for obtaining transmembrane topology models with high reliability
http://www.bioinfo.no/tools/bomp BOMP: a program to predict integral &#223-barrel outer membrane proteins encoded within genomes of Gram-negative bacteria
http://bioinformatics.biol.uoa.gr/PRED-TMBB PRED-TMBB: a web server for predicting the topology of &#223-barrel outer membrane proteins
http://www.nii.res.in/nrps-pks.html NRPS-PKS: a knowledge-based resource for analysis of NRPS/PKS megasynthases
http://www.imtech.res.in/raghava/eslpred/ ESLpred: SVM-based method for subcellular localization of eukaryotic proteins using dipeptide composition and PSI-BLAST
http://biowulf.bu.edu/MotifViz MotifViz: an analysis and visualization tool for motif discovery
http://math.genebee.msu.ru/~psn/ SDPpred: a tool for prediction of amino acid residues that determine differences in functional specificity of homologous proteins
http://genopole.toulouse.inra.fr/bioinfo/Iccare The Iccare web server: an attempt to merge sequence and mapping information for plant and animal species
http://imgt.cines.fr IMGT/V-QUEST	an integrated software program for immunoglobulin and T cell receptor V&#150J and V&#150D&#150J rearrangement analysis
http://ymd.med.yale.edu/karma/cgi-bin/karma.pl KARMA: a web server application for comparing and annotating heterogeneous microarray platforms
http://www.bork.embl.de/ArrayProspector ArrayProspector: a web resource of functional associations inferred from microarray expression data
http://vortex.cs.wayne.edu/Projects.html Onto-Tools: an ensemble of web-accessible	ontology-based tools for the functional design and interpretation of high-throughput gene expression experiments
http://www.pathogenomics.ca/arraypipe ArrayPipe: a flexible processing pipeline for microarray data
http://www.snubi.org/software/ArrayXPath/ ArrayXPath: mapping and visualizing microarray gene-expression data with integrated biological pathway resources using Scalable Vector Graphics
http://www.ebi.ac.uk/expressionprofiler Expression Profiler: next generation&#151an online platform for analysis of microarray data
http://www.pathogenomics.ca/probelynx ProbeLynx: a tool for updating the association of microarray probes to genes
http://morenolab.whitehead.emory.edu/cgi-bin/confac/login.pl CONFAC: automated application of comparative genomic promoter analysis to DNA microarray datasets
http://gepas.bioinfo.cnio.es New challenges in gene expression data analysis and the extended GEPAS
http://microarrays.unife.it GOAL: automated Gene Ontology analysis of expression profiles
http://webclu.bio.wzw.tum.de/stride/ STRIDE: a web server for secondary structure assignment from known atomic coordinates of proteins
http://bioinfo3d.cs.tau.ac.il BioInfo3D: a suite of tools for structural bioinformatics
http://bioserv.rpbs.jussieu.fr/SCit SCit: web tools for protein side chain conformation analysis
http://i.moltalk.org iMolTalk: an interactive	internet-based protein structure analysis server
http://www.rostlab.org/services/LOCtarget/ LOCnet and LOCtarget: sub-cellular localization for structural genomics targets
http://csbl.bmb.uga.edu/protein_pipeline PROSPECT-PSPP: an automatic computational pipeline for protein structure prediction
http://robetta.bakerlab.org Protein structure prediction and analysis using the Robetta server
http://www.zbh.uni-hamburg.de/wurst Wurst: a protein threading server with a structural scoring function	sequence profiles and optimized substitution matrices
http://foldminer.stanford.edu/ FoldMiner and LOCK 2: protein structure comparison and motif discovery on the web
http://SledgeHmmer.sdsc.edu SledgeHMMER: a web server for batch searching the Pfam database
http://bioserv.rpbs.jussieu.fr/cgi-bin/SA-Search SA-Search: a web tool for protein structure mining based on a Structural Alphabet
http://wwwmgs.bionet.nsc.ru/mgs/systems/fastprot/pdbsitescan.html PDBSiteScan: a program for searching for active	binding and posttranslational modification sites in the 3D structures of proteins
http://pvsoar.bioengr.uic.edu/ pvSOAR: detecting similar surface patterns of pocket and void surfaces of amino acid residues on proteins
http://www.imtech.res.in/bvs/pepbuild/ PepBuild: a web server for building structure data of peptides/proteins
http://astro.temple.edu/~feng/Servers/BioinformaticServers.htm LINKER: a web server to generate peptide sequences with extended conformation
http://monster.northwestern.edu M<SMALL>ONSTER</SMALL>: inferring non-covalent interactions in macromolecular structures from atomic coordinate data
http://www.rostlab.org/services/CHOP/ CHOP: parsing proteins into structural domains
http://ProteinDBS.rnet.missouri.edu ProteinDBS: a real-time retrieval system for protein structure comparison
http://basic.bioinfo.pl Detecting distant homology with Meta-BASIC
http://basic.bioinfo.pl/duf.pl Detecting distant homology with Meta-BASIC
http://fatcat.burnham.org FATCAT: a web server for flexible structure comparison and structure similarity searching
http://asia.genesilico.pl/colorado3d/ COLORADO3D	a web server for the visual analysis of protein structures
http://wishart.biology.ualberta.ca/SuperPose/ SuperPose: a simple server for sophisticated structural superposition
http://sms.cbi.cnptia.embrapa.br <SUP>Java</SUP>Protein Dossier: a novel web-based data visualization tool for comprehensive analysis of protein structure
http://mirrors.rcsb.org/SMS <SUP>Java</SUP>Protein Dossier: a novel web-based data visualization tool for comprehensive analysis of protein structure
http://trantor.bioc.columbia.edu/SMS <SUP>Java</SUP>Protein Dossier: a novel web-based data visualization tool for comprehensive analysis of protein structure
http://www.es.embnet.org/SMS/ <SUP>Java</SUP>Protein Dossier: a novel web-based data visualization tool for comprehensive analysis of protein structure
http://www.ncbs.res.in/~faculty/mini/imot/iMOTserver.html iMOT: an interactive package for the selection of spatially interacting motifs
http://www.ncbs.res.in/~faculty/mini/imot/supplementary.html iMOT: an interactive package for the selection of spatially interacting motifs
http://igs-server.cnrs-mrs.fr/Caspr/ CaspR: a web server for automated molecular replacement using homology modelling
http://igs-server.cnrs-mrs.fr/elnemo/index.html <I>ElN&eacutemo</I>: a normal mode web server for protein movement analysis and the generation of templates for molecular replacement
http://kinemage.biochem.duke.edu M<SMALL>OL</SMALL>P<SMALL>ROBITY</SMALL>: structure validation and all-atom contact analysis for nucleic acids and their complexes
http://bioinf.man.ac.uk/cgi-bin/neil/ntfront.pl FAN: fingerprint analysis of nucleotide sequences
http://www.caspur.it/CSTminer/ CSTminer: a web tool for the identification of coding and noncoding conserved sequence tags through cross-species genome comparison
http://wwwmgs.bionet.nsc.ru/mgs/programs/low_complexity/ Complexity: an internet resource for analysis of DNA sequence complexity
http://cubic.bioc.columbia.edu/services/NLProt/ NLProt: extracting protein names and sequences from papers
http://proteomics.mcw.edu/promost ProMoST (Protein Modification Screening Tool): a web-based tool for mapping protein modifications on two-dimensional gels
http://iris.physics.iisc.ernet.in/bsdd BSDD: Biomolecules Segment Display Device&#151a web-based interactive display tool
http://144.16.71.2/bsdd BSDD: Biomolecules Segment Display Device&#151a web-based interactive display tool
http://acmes.rnet.missouri.edu ACMES: fast multiple-genome searches for short repeat sequences with concurrent cross-species information retrieval
http://www.ncbi.nih.gov/projects/genotyping/formpage.cgi A web-based genotyping resource for viral sequences
http://wishart.biology.ualberta.ca/PlasMapper PlasMapper: a web server for drawing and auto-annotating plasmid maps
http://agave.wustl.edu/pdb2pqr/ PDB2PQR: an automated pipeline for the setup of Poisson&#150Boltzmann electrostatics calculations
http://www.cryst.bbk.ac.uk/cdweb DICHROWEB	an online server for protein secondary structure analyses from circular dichroism spectroscopic data
http://bioinformatica.cigb.edu/isotopica Isotopica: a tool for the calculation and viewing of complex isotopic envelopes
http://coco.protein.osaka-u.ac.jp/isotopica Isotopica: a tool for the calculation and viewing of complex isotopic envelopes
http://ang.cz3.nus.edu.sg/cgi-bin/prog/norm.pl MoViES: molecular vibrations evaluation server for analysis of fluctuational dynamics of proteins and nucleic acids

## Sheet: URLs-2005
http://bioinformatics.ubc.ca/resources/links_directory/ The Bioinformatics Links Directory: a Compilation of Molecular Biology Web Servers
http://nar.oupjournals.org/ The Bioinformatics Links Directory: a Compilation of Molecular Biology Web Servers
http://bioinformatics.ubc.ca/resources/links_directory/narweb2005/ The Bioinformatics Links Directory: a Compilation of Molecular Biology Web Servers
http://www.w3.org/TR/soap SOAP-based services provided by the European Bioinformatics Institute
http://www.w3.org/ws SOAP-based services provided by the European Bioinformatics Institute
http://www.ebi.ac.uk/Tools/webservices SOAP-based services provided by the European Bioinformatics Institute
http://sms.cbi.cnptia.embrapa.br The Diamond STING server
http://trantor.bioc.columbia.edu/SMS The Diamond STING server
http://bioinf.cs.ucl.ac.uk/software.html Protein structure prediction servers at University College London
http://ligin.weizmann.ac.il/space SPACE: a suite of tools for protein structure prediction and analysis based on complementarity and environment
http://bioserv.rpbs.jussieu.fr/ RPBS: a web resource for structural bioinformatics
http://bioserv.rpbs.jussieu.fr/SpecificServices.html RPBS: a web resource for structural bioinformatics
http://schubert.bio.uniroma1.it/SCR_FIND CAMPO	SCR_FIND and CHC_FIND: a suite of web tools for computational structural biology
http://schubert.bio.uniroma1.it/CHC_FIND CAMPO	SCR_FIND and CHC_FIND: a suite of web tools for computational structural biology
http://schubert.bio.uniroma1.it/CAMPO CAMPO	SCR_FIND and CHC_FIND: a suite of web tools for computational structural biology
http://www.dcode.org/ Dcode.org anthology of comparative genomic tools
http://pat.cbs.cnrs.fr PAT: a protein analysis toolkit for integrated biocomputing on the web
http://www.igb.uci.edu/servers/psss.html SCRATCH: a protein structure and structural feature prediction server
http://protinfo.compbio.washington.edu PROTINFO: new algorithms for enhanced protein structure predictions
http://www.protarget.cs.huji.ac.il ProTarget: automatic prediction of protein structure novelty
http://cluster.physics.iisc.ernet.in/ff/ Fragment Finder: a web-based software to identify similar three-dimensional structural motif
http://144.16.71.148/ff/ Fragment Finder: a web-based software to identify similar three-dimensional structural motif
http://www.ebi.ac.uk/thornton-srv/databases/ProFunc ProFunc: a server for predicting protein function from 3D structure
http://dunbrack.fccc.edu/pisces PISCES: recent improvements to a PDB sequence culling server
http://wwwmgs.bionet.nsc.ru/mgs/programs/panalyst/ WebProAnalyst: an interactive tool for analysis of quantitative structure&#150activity relationships in protein families
http://Bioinformatics.ustc.edu.cn/LOCSVMPSI/LOCSVMPSI.php LOCSVMPSI: a web server for subcellular localization of eukaryotic proteins using SVM and profile of PSI-BLAST
http://as2ts.llnl.gov/ AS2TS system for protein structure modeling and analysis
http://www.ebi.ac.uk/InterProScan/ InterProScan: protein domains identifier
http://www.w3.org/TR/soap/ InterProScan: protein domains identifier
http://mendel.imp.univie.ac.at/phylodome/ PhyloDome&#151visualization of taxonomic distributions of domains occurring in eukaryote protein sequence sets
http://hodgkin.mbu.iisc.ernet.in/~prodoc PRODOC: a resource for the comparison of tethered protein domain architectures with in-built information on remotely related domain families
http://www.ncbs.res.in/~faculty/mini/DIAL/home.html DIAL: a web-based server for the automatic identification of structural domains in proteins
http://www.ncbs.res.in/~faculty/mini/DIAL/supplement.html DIAL: a web-based server for the automatic identification of structural domains in proteins
http://pdbfun.uniroma2.it pdbFun: mass selection and fast comparison of annotated PDB residues
http://immunax.dfci.harvard.edu/PEPVAC/ PEPVAC: a web server for multi-epitope vaccine development based on the prediction of supertypic MHC ligands
http://www.imtech.res.in/raghava/gpcrsclass/ GPCRsclass: a web tool for the classification of amine type of G-protein-coupled receptors
http://bioinformatics.uams.edu/raghava/gpersclass/ GPCRsclass: a web tool for the classification of amine type of G-protein-coupled receptors
http://griffin.cbrc.jp/ GRIFFIN: a system for predicting GPCR&#150G-protein coupling selectivity using a support vector machine and a hidden Markov model
http://www.imtech.res.in/raghava/bhairpred/ BhairPred: prediction of &#223-hairpins in a protein from multiple alignment information using ANN and SVM techniques
http://ibivu.cs.vu.nl/programs/scoobywww Scooby-domain: prediction of globular domains in protein sequence
http://psfs.cbrc.jp/tmbeta-net/ TMBETA-NET: discrimination and prediction of membrane spanning &#223-strands in outer membrane proteins
http://bioinfo.ernet.in/cep.htm CEP: a conformational epitope prediction server
http://antigen.i2r.a-star.edu.sg/multipred/ MULTIPRED: a computational system for prediction of promiscuous HLA binding peptides
http://antigen.i2r.a-star.edu.sg/predBalbc/ PRED<SUP>BALB/c</SUP>: a system for the prediction of peptide binding to H2<SUP>d</SUP> molecules	a haplotype of the BALB/c mouse
http://973-proteinweb.ustc.edu.cn/gps/gps_web/ GPS: a comprehensive www server for phosphorylation sites prediction
http://www.bioinformatics.leeds.ac.uk/betaBarrel TMB-Hunt: a web server to screen sequence sets for transmembrane &#223-barrel proteins
http://theory.med.buffalo.edu Web-based toolkits for topology prediction of transmembrane helical proteins	fold recognition	structure and binding scoring	folding-kinetics analysis and comparative analysis of domain combinations
http://gpcr.biocomp.unibo.it/biodec/ TRAMPLE: the transmembrane protein labelling environment
http://www.imtech.res.in/raghava/pcleavage/ Pcleavage: an SVM based method for prediction of constitutive proteasome and immunoproteasome cleavage sites in antigenic sequences
http://bioinformatics.uams.edu/mirror/pcleavage/ Pcleavage: an SVM based method for prediction of constitutive proteasome and immunoproteasome cleavage sites in antigenic sequences
http://wwwalt.med-rz.uniklinik-saarland.de/med_fak/humangenetik/software/index.html GraBCas: a bioinformatics tool for score-based prediction of Caspase- and Granzyme B-cleavage sites in protein sequences
http://www.glycosciences.de/glyprot/ GlyProt: <I>in silico</I> glycosylation of proteins
http://www.nii.res.in/searchgtr.html SEARCHGTr: a program for analysis of glycosyltransferases involved in glycosylation of secondary metabolites
http://KinasePhos.mbc.nctu.edu.tw/ KinasePhos: a web tool for identifying protein kinase-specific phosphorylation sites
http://clavius.bc.edu/~clotelab/DiANNA/ DiANNA: a web server for disulfide connectivity prediction
http://medock.csie.ntu.edu.tw/ MEDock: a web server for efficient prediction of ligand binding sites based on a novel optimization algorithm
http://bioinfo.mc.ntu.edu.tw/medock/ MEDock: a web server for efficient prediction of ligand binding sites based on a novel optimization algorithm
http://protevo.eb.tuebingen.mpg.de/repper REPPER&#151repeats and their periodicities in fibrous proteins
http://protevo.eb.tuebingen.mpg.de/hhpred The HHpred interactive server for protein homology detection and structure prediction
http://ffas.burnham.org/Fragnostic Fragnostic: walking through protein structure space
http://www.icgeb.org/protein/ CX	DPX and PRIDE: WWW servers for the analysis and comparison of protein 3D structures
http://quasimotifinder.tau.ac.il/ QuasiMotiFinder: protein annotation by searching for evolutionarily conserved motif-like patterns
http://www.pmap.csupomona.edu/MINER/ MINER: software for phylogenetic motif identification
http://svc.molgen.mpg.de SVC: structured visualization of evolutionary sequence conservation
http://www.ncbs.res.in/~faculty/mini/scanmot/scanmot.html SCANMOT: searching for similar sequences using a simultaneous scan of multiple sequence motifs
http://www.proteus.cs.huji.ac.il ProTeus: identifying signatures in protein termini
http://bioinfo.weizmann.ac.il/blocks/OneCYRCA One-Block CYRCA: an automated procedure for identifying multiple-block alignments from single block queries
http://ffas.burnham.org FFAS03: a server for profile&#150profile sequence alignments
http://ibivu.cs.vu.nl/programs/pralinewww/ PRALINE: a multiple sequence alignment toolbox that integrates homology-extended and secondary structure information
http://compbio.cs.sfu.ca/MAM.htm Manipulating multiple sequence alignments via MaM and WebMaM
http://atgc.lirmm.fr/mam Manipulating multiple sequence alignments via MaM and WebMaM
http://consurf.tau.ac.il/ ConSurf 2005: the projection of evolutionary conservation scores of residues on protein structures
http://sride.enzim.hu SRide: a server for identifying stabilizing residues in proteins
http://gpcr.biocomp.unibo.it/cgi/predictors/I-Mutant2.0/I-Mutant2.0.cgi I-Mutant2.0: predicting stability changes upon mutation from the protein sequence or structure
http://www.lifescienceweb.org/ MutDB services: interactive structural analysis of mutation data
http://www.mutdb.org/ MutDB services: interactive structural analysis of mutation data
http://www.microbial-pathogenesis.org/stickwrld/ MAVL/StickWRLD for protein: visualizing protein sequence families to detect non-consensus features
http://bioserv.rpbs.jussieu.fr/cgi-bin/PPG PPG: online generation of protein pictures and animations
http://bioverse.compbio.washington.edu BIOVERSE: enhancements to the framework for structural	functional and contextual modeling of proteins and proteomes
http://www.scmbb.ulb.ac.be/pathfinding/ Metabolic PathFinding: inferring relevant pathways in biochemical networks
http://gordion.hpc.eng.ku.edu.tr/prism PRISM: protein interactions by structural matching
http:/bioinfo3d.cs.tau.ac.il/SiteEngine SiteEngines: recognition and comparison of binding sites and protein&#150protein interfaces
http:/bioinfo3d.cs.tau.ac.il/I2I-SiteEngine SiteEngines: recognition and comparison of binding sites and protein&#150protein interfaces
http://ibivu.cs.vu.nl/programs/popscompwww/ POPSCOMP: an automated interaction analysis of biomolecular complexes
http://www.pdg.cnb.uam.es/eva/con/index.html EVAcon: a protein contact prediction evaluation service
http://cubic.bioc.columbia.edu/eva/con/index.html EVAcon: a protein contact prediction evaluation service
http://eva.compbio.ucsf.edu/~eva/con/index.html EVAcon: a protein contact prediction evaluation service
http://visant.bu.edu VisANT: data-integrating visual framework for biological networks and modules
http://wishart.biology.ualberta.ca/moviemaker MovieMaker: a web server for rapid rendering of protein motions and interactions
http://bioinfo3d.cs.tau.ac.il PatchDock and SymmDock: servers for rigid and symmetric docking
http://biophysics.cs.vt.edu/H++ H++: a server for estimating p<I>K</I><SUB>a</SUB>s and adding missing hydrogens to macromolecules
http://bioserv.rpbs.jussieu.fr/PCE PCE: web tools to compute protein continuum electrostatics
http://proteomics.mcw.edu/denovoid DeNovoID: a web-based tool for identifying peptides from sequence and mass tags deduced from <I>de novo</I> peptide sequencing by mass spectroscopy
http://foldx.embl.de/ The FoldX web server: an online force field
http://biodev.hgen.pitt.edu/enologos/ enoLOGOS: a versatile web tool for energy normalized sequence logos
http://www.esat.kuleuven.ac.be/~saerts/software/toucan.php TOUCAN 2: the all-inclusive open source workbench for regulatory sequence analysis
http://www.athamap.de AthaMap web tools for database-assisted identification of combinatorial <I>cis</I>-regulatory elements and the display of highly conserved transcription factor binding sites in <I>Arabidopsis thaliana</I>
http://synor.dcode.org Identifying synonymous regulatory elements in vertebrate genomes
http://cismols.cchmc.org/ CisMols Analyzer: identification of compositionally similar <I>cis</I>-element clusters in ortholog conserved regions of coordinately expressed genes
http://cic.cs.wustl.edu/wordspy WordSpy: identifying transcription factor binding motifs by building a dictionary and learning a grammar
http://wwwmgs2.bionet.nsc.ru/argo/ ARGO: a web system for the detection of degenerate motifs and large-scale recognition of eukaryotic promoters
http://emj-pc.ics.uci.edu/argo/ ARGO: a web system for the detection of degenerate motifs and large-scale recognition of eukaryotic promoters
http://promoterplot.fmi.ch PromoterPlot: a graphical display of promoter similarities by pattern recognition
http://ekhidna.biocenter.helsinki.fi/poco POCO: discovery of regulatory patterns from promoters of oppositely expressed gene sets
http://www.gene-regulation.com/cgi-bin/pub/programs/pmatch/bin/p-match.cgi P-Match: transcription factor binding site search by combining patterns and weight matrices
http://treg.molgen.mpg.de T-Reg Comparator: an analysis tool for the comparison of position weight matrices
http://biodev.hgen.pitt.edu/Footer/ FOOTER: a web tool for finding mammalian DNA regulatory regions using phylogenetic footprinting
http://conreal.niob.knaw.nl CONREAL web server: identification and visualization of conserved transcription factor binding sites
http://opal.biology.gatech.edu/GeneMark/ GeneMark: web software for gene finding in prokaryotes	eukaryotes and viruses
http://wishart.biology.ualberta.ca/basys BASys: a web server for automated bacterial genome annotation
http://www.babelomics.org BABELOMICS: a suite of web tools for functional annotation and analysis of groups of genes in high-throughput experiments
http://augustus.gobics.de/submission AUGUSTUS: a web server for gene prediction in eukaryotes that allows user-defined constraints
http://www.cbs.dtu.dk Integrating protein annotation resources through the Distributed Annotation System
http://www.cbs.dtu.dk/cgi-bin/das Integrating protein annotation resources through the Distributed Annotation System
http://www.ebi.ac.uk/das-srv/uniprot/das Integrating protein annotation resources through the Distributed Annotation System
http://www.genoscope.cns.fr/agc/tools/micheck MICheck: a web tool for fast checking of syntactic annotations of bacterial genomes
http://snpanalyzer.utmem.edu/ nsSNPAnalyzer: identifying disease-associated nonsynonymous single nucleotide polymorphisms
http://www.istech.info/istech/board/login_form.jsp SNPAnalyzer: a web-based integrated workbench for single-nucleotide polymorphism analysis
http://bioinfo.bsd.uchicago.edu/SNP_cutter.htm SNP Cutter: a comprehensive tool for SNP PCR&#150RFLP assay design
http://hornbill.cspp.latrobe.edu.au/snpdiscovery.html SNPServer: a real-time SNP discovery tool
http://andromeda.gsf.de/arts ARTS: a web-based tool for the set-up of high-throughput genome-wide mapping panels for the SNP genotyping of mouse mutants
http://pupasview.ochoa.fib.es PupasView: a visual tool for selecting suitable SNPs	with putative pathological effect in genes	for genotyping purposes
http://www.pupasnp.org PupasView: a visual tool for selecting suitable SNPs	with putative pathological effect in genes	for genotyping purposes
http://www.secretomes.umn.edu/AMOD/ AMOD: a morpholino oligonucleotide selection tool
http://Genstyle.imed.jussieu.fr GENSTYLE: exploration and analysis of DNA sequences with genomic signature
http://cgi-www.daimi.au.dk/cgi-chili/PriFi/main PriFi: using a multiple alignment of related sequences to find primers for amplification of homologs
http://publish.yorku.ca/~pjohnson/AssemblyPCRoligomaker.html Assembly PCR oligo maker: a tool for designing oligodeoxynucleotides for constructing long DNA molecules for RNA production
http://www.prodoric.de/JCat JCat: a novel tool to adapt codon usage of a target gene to its potential expression host
http://dialign.gobics.de/chaos-dialign-submission Multiple alignment of genomic sequences using CHAOS	DIALIGN and ABC
http://www.paralign.org PARALIGN: rapid and sensitive sequence similarity searches powered by parallel computing technology
http://www.loria.fr/projects/YASS/ YASS: enhancing the sensitivity of DNA similarity search
http://genomics14.bu.edu:8080/MuPlex/MuPlex.html MuPlex: multi-objective multiplex PCR assay design
http://imgen.ccbb.pitt.edu/sop3v2 SOP<SUP>3</SUP>v2: web-based selection of oligonucleotide primer trios for genotyping of human and mouse polymorphisms
http://power.nhri.org.tw POWER: PhylOgenetic WEb Repeater&#151an integrated and user-optimized framework for biomolecular phylogenetic analysis
http://atgc.lirmm.fr/phyml PHYML Online&#151a web server for fast maximum likelihood-based phylogenetic inference
http://molgen.biol.rug.nl/websoftware/projector2 Projector 2: contig mapping for efficient gap-closure of prokaryotic genome sequence assemblies
http://www.cbs.dtu.dk/services/FeatureExtract/ FeatureExtract&#151extraction of sequence annotation made easy
http://dna.bio.puc.cl/tm.html dnaMATE: a consensus melting temperature prediction server for short DNA sequences
http://stitchprofiles.uio.no Stitchprofiles.uio.no: analysis of partly melted DNA conformations using stitch profiles
http://www.bioinfo.rpi.edu/applications/hybrid/ DINAMelt web server for nucleic acid melting prediction
http://e-rnai.dkfz.de/ E-RNAi: a web application to design optimized RNAi constructs
http://dsCheck.RNAi.jp/ dsCheck: highly sensitive off-target search software for double-stranded RNA-mediated RNA interference
http://www.t-profiler.org T-profiler: scoring the activity of predefined groups of genes using gene expression data
http://genomics10.bu.edu/terrence/gems/ GEMS: a web server for biclustering analysis of expression data
http://clavius.bc.edu/~clotelab/RNALOSS/ RNALOSS: a web server for RNA locally optimal secondary structures
http://kinefold.curie.fr/ Kinefold web server for RNA/DNA folding path and structure prediction including pseudoknots and knots
http://www.cbs.dtu.dk/services/OligoWiz2 OligoWiz 2.0&#151integrating sequence feature annotation into the design of microarray probes
http://www.gepas.org GEPAS	an experiment-oriented pipeline for the analysis of microarray gene expression data
http://www.snubi.org/software/ArrayXPath/ ArrayXPath II: mapping and visualizing microarray gene-expression data with biomedical ontologies and integrated biological pathway resources using Scalable Vector Graphics
http://genome.ucsd.edu/microarray VAMPIRE microarray suite: a web-based platform for the interpretation of gene expression data
https://pathwayexplorer.genome.tugraz.at PathwayExplorer: web service for visualizing high-throughput expression data on biological pathways
http://genome.tugraz.at PathwayExplorer: web service for visualizing high-throughput expression data on biological pathways
http://race.unil.ch <I>RACE</I>: Remote Analysis Computation for gene Expression data
http://muscle.cribi.unipd.it/midaw/ MIDAW: a web tool for statistical analysis of microarray data
http://foldalign.kvl.dk The <SMALL>FOLDALIGN</SMALL> web server for pairwise structural RNA alignment and mutual motif search
http://tstag.molgen.mpg.de T-STAG: resource and web-interface for tissue-specific transcripts and genes
http://eureka.ims.u-tokyo.ac.jp/asian ASIAN: a web server for inferring a regulatory network framework from gene expression profiles
http://bioinfo.crs4.it/AH2.0 AntiHunter 2.0: increased speed and sensitivity in searching BLAST output for EST antisense transcripts
https://fungalgenome.concordia.ca/tools/TargetIdentifier.html TargetIdentifier: a webserver for identifying full-length cDNAs from EST sequences
http://gba.cbi.pku.edu.cn GBA server: EST-based digital gene expression profiling
https://fungalgenome.concordia.ca/tools/OrfPredictor.html OrfPredictor: predicting protein-coding regions in EST-derived sequences
http://genome.ewha.ac.kr/ASePCR/ ASePCR: alternative splicing electronic RT&#150PCR in multiple tissues and organs
http://lowelab.ucsc.edu/tRNAscan-SE/ The tRNAscan-SE	snoscan and snoGPS web servers for the detection of tRNAs and snoRNAs
http://lowelab.ucsc.edu/snoscan/ The tRNAscan-SE	snoscan and snoGPS web servers for the detection of tRNAs and snoRNAs
http://lowelab.ucsc.edu/snoGPS/ The tRNAscan-SE	snoscan and snoGPS web servers for the detection of tRNAs and snoRNAs
http://www.ibt.unam.mx/biocomputo/ribex.html RibEx: a web server for locating riboswitches and other conserved bacterial regulatory elements
http://bioserv.rpbs.jussieu.fr/websage/index.php WEBSAGE: a web tool for visual analysis of differentially expressed human SAGE tags
http://www.imbb.forth.gr/microinspector MicroInspector: a web tool for detection of miRNA binding sites in an RNA sequence
http://bioinfo3.noble.org/miRU.htm miRU: an automated plant miRNA target prediction server
http://www.dkfz-heidelberg.de/spec/aismig/ AISMIG&#151an interactive server-side molecule image generator
https://www.cebitec.uni-bielefeld.de/groups/brf/software/brigep/ BRIGEP&#151the BRIDGE-based genome&#150transcriptome&#150proteome browser
http://ftp.cebitec.uni-bielefeld.de/pub/software/ BRIGEP&#151the BRIDGE-based genome&#150transcriptome&#150proteome browser
http://www.bioinformatics.polimi.it/GFINDer/ GFINDer: genetic disease and phenotype location statistical analysis and mining of dynamically annotated gene lists
http://eclair.btk.fi &Eacuteclair&#151a web service for unravelling species origin of sequences sampled from mixed host interfaces
http://www.mlst.net The multilocus sequence typing network: mlst.net
http://www.brop.org The bioinformatics resource for oral pathogens
http://genereg.ornl.gov/webgestalt/ WebGestalt: an integrated system for exploring gene sets in various biological contexts
http://genereg.ornl.gov/webgestalt/wg_enrich.php WebGestalt: an integrated system for exploring gene sets in various biological contexts
http://www.genepath.org/genepath2 GenePath: from mutations to genetic networks and back
http://scmd.gi.k.u-tokyo.ac.jp/ Data mining tools for the <I>Saccharomyces cerevisiae</I> morphological database
http://www.cmbi.ru.nl/GeneSeeker/ GeneSeeker: extraction and integration of human disease-related information from web-based genetic databases
http://vortex.cs.wayne.edu/Projects.html Recent additions and improvements to the Onto-Tools
http://mrs.cmbi.ru.nl/ MRS: a fast and compact retrieval system for biological data
http://mrs.cmbi.ru.nl/download/ MRS: a fast and compact retrieval system for biological data
http://orb.public.stolaf.edu/CCTdemo Current Comparative Table (CCT) automates customized searches of dynamic biological databases
http://sourceforge.net/projects/orb-cct Current Comparative Table (CCT) automates customized searches of dynamic biological databases
http://www.glycosciences.de/tools/PubFinder PubFinder: a tool for improving retrieval rate of relevant PubMed abstracts
http://andromeda.gsf.de/litminer LitMiner and WikiGene: identifying problem-related key players of gene regulation using publication abstracts
http://andromeda.gsf.de/wiki LitMiner and WikiGene: identifying problem-related key players of gene regulation using publication abstracts
http://www.gopubmed.org GoPubMed: exploring PubMed with the Gene Ontology

## Sheet: URLs-2006
http://www.ncbi.nlm.nih.gov/BLAST/ BLAST: improvements for better sequence analysis
http://babel.ucmp.umu.se/fish/ FISH&#151family identification of sequence homologues using structure anchored hidden Markov models
http://www.migenas.org The MIGenAS integrated bioinformatics toolkit for web-based sequence analysis
http://pre-s.protein.osaka-u.ac.jp/~prebi/ PreBI: prediction of biological interfaces of proteins in crystals
http://past.in.tum.de/ PAST: fast structure-based searching in the PDB
http://ignm.ccbb.pitt.edu/GNM_Online_Calculation.htm <I>o</I>GNM: online computation of structural dynamics using the Gaussian Network Model
http://jing.cz3.nus.edu.sg/cgi-bin/prof/prof.cgi PROFEAT: a web server for computing structural and physicochemical features of proteins and peptides from amino acid sequence
http://lorentz.immstr.pasteur.fr/pdb_hydro.php PDB_Hydro: incorporating dipolar solvents with variable density in the Poisson&#150Boltzmann treatment of macromolecule electrostatics
http://pheps.orgchm.bas.bg/home.html PHEPS: web-based pH-dependent Protein Electrostatics Server
http://polymerase.ucd.ie/pKa_Design pKD: re-designing protein p<I>K</I><SUB>a</SUB> values
http://lorentz.immstr.pasteur.fr/nomad-ref.php NOMAD-Ref: visualization	deformation and refinement of macromolecular structures based on all-atom normal mode analysis
http://biomechanics.ecs.umass.edu/umms.html UMMS: constrained harmonic and anharmonic analyses of macromolecules based on elastic network models
http://wishart.biology.ualberta.ca/preditor PREDITOR: a web server for predicting protein torsion angle restraints
http://psfs.cbrc.jp/fold-rate/ FOLD-RATE: prediction of protein folding rates from amino acid sequence
http://www.ebgm.jussieu.fr/~gelly/index.html Protein Peeling 2: a web server to convert protein structures into series of protein units
http://projects.villa-bosch.de/mcm/database/prosat2/ ProSAT2&#151Protein Structure Annotation Server
http://pymol.sourceforge.net/ FeatureMap3D&#151a tool to map protein features and sequence conservation onto homologous structures in the PDB
http://www.cbs.dtu.dk/services/FeatureMap3D/ FeatureMap3D&#151a tool to map protein features and sequence conservation onto homologous structures in the PDB
http://ProKware.mbc.nctu.edu.tw/ ProKware: integrated software for presenting protein structural properties in protein tertiary structures
http://opaas.ibms.sinica.edu.tw OPAAS: a web server for optimal	permuted	and other alternative alignments of protein structures
http://localizome.org/ Localizome: a server for identifying transmembrane topologies and TM helices of eukaryotic proteins utilizing domain information
http://www.bioinformatics.nl/tools/treedom/ TreeDomViewer: a tool for the visualization of phylogeny and protein domain structure
http://www.pdg.cnb.uam.es/servers/treedet TreeDet: a web server to explore sequence space
http://cast.engr.uic.edu CASTp: computed atlas of surface topography of proteins with structural and topographical mapping of functionally annotated residues
http://bioinformatics.univ-reunion.fr/PBE/ Protein Block Expert (PBE): a web-based protein structure analysis server using a structural alphabet
http://gibk26.bse.kyutech.ac.jp/jouhou/readout/ ReadOut: structure-based calculation of direct and indirect readout energies and specificities for protein&#150DNA recognition
http://cluster.physics.iisc.ernet.in/3dss/ 3dSS: 3D structural superposition
http://10.188.1.15/3dss/ 3dSS: 3D structural superposition
http://www.microbial-pathogenesis.org/stickwrld/ MAVL/StickWRLD: analyzing structural constraints using interpositional dependencies in biomolecular sequence alignments
http://hhrep.tuebingen.mpg.de HHrep: <I>de novo</I> protein repeat detection and the origin of TIM barrels
http://crick.mbu.iisc.ernet.in/~CASCADE/CascadeBlast.html Cascade PSI-BLAST web server: a remote homology search tool for relating protein domains
http://bioserv.rpbs.jussieu.fr/SABBAC.html SABBAC: online Structural Alphabet-based protein BackBone reconstruction from Alpha-Carbon trace
http://ps2.life.nctu.edu.tw/ (PS)<SUP>2</SUP>: protein structure prediction server
http://www.iipl.fudan.edu.cn/lschen/kemadom.htm KemaDom: a web server for domain prediction using kernel machine with local context
http://www.iipl.fudan.edu.cn/~lschen/kemadom.htm KemaDom: a web server for domain prediction using kernel machine with local context
http://distill.ucd.ie/spritz/ Spritz: a server for the prediction of intrinsically disordered regions in protein sequences using kernel machines
http://protein.cribi.unipd.it/spritz/ Spritz: a server for the prediction of intrinsically disordered regions in protein sequences using kernel machines
http://www.biosapiens.info PONGO: a web server for multiple predictions of all-alpha transmembrane proteins
http://pongo.biocomp.unibo.it PONGO: a web server for multiple predictions of all-alpha transmembrane proteins
http://pongo.biocomp.unibo.it/pongo PONGO: a web server for multiple predictions of all-alpha transmembrane proteins
http://www.fiserlab.org/servers/archpred ArchPRED: a template based loop structure prediction server
http://disulfind.dsi.unifi.it/ DISULFIND: a disulfide bonding state and cysteine connectivity prediction server
http://bioinformatics.bc.edu/clotelab/DiANNA/ DiANNA 1.1: an extension of the DiANNA web server for ternary cysteine classification
http://rostlab.org/services/proftmb PROFtmb: a web server for predicting bacterial transmembrane beta barrel proteins
http://bioinformatics.bc.edu/clotelab/transFold transFold: a web server for predicting the structure and residue contacts of transmembrane beta-barrels
http://www-bs.informatik.uni-tuebingen.de/SVMHC/ SVMHC: a server for prediction of MHC-binding peptides
http://biotools.cs.ntou.edu.tw/REMUS R<SUB>E</SUB>MUS: a tool for identification of unique peptide segments as epitopes
http://bioinfo.life.nthu.edu.tw/REMUS R<SUB>E</SUB>MUS: a tool for identification of unique peptide segments as epitopes
http://spider.cs.ntou.edu.tw/BioTools/REMUS R<SUB>E</SUB>MUS: a tool for identification of unique peptide segments as epitopes
http://spider.cs.ntou.edu.tw/BioTools/REMUS-DOCS.html R<SUB>E</SUB>MUS: a tool for identification of unique peptide segments as epitopes
http://www.imtech.res.in/raghava/algpred/ AlgPred: prediction of allergenic proteins and mapping of IgE epitopes
http://www.imtech.res.in/raghava/algpred/ AlgPred: prediction of allergenic proteins and mapping of IgE epitopes
http://bioinformatics.albany.edu/~ptarget pTARGET: a web server for predicting protein subcellular localization
http://mendel.imp.ac.at/dout/ DOUTfinder&#151identification of distant domain outliers using subsignificant sequence similarity
http://www.dddc.ac.cn/tarfisdock/ TarFisDock: a web server for identifying drug targets with docking approach
http://www.ysbl.york.ac.uk/sgTarget sgTarget: a target selection resource for structural genomics
http://caps.ncbs.res.in/harmony/ HARMONY: a server for the assessment of protein structures
http://rosettadesign.med.unc.edu RosettaDesign server for protein design
http://cupsat.uni-koeln.de CUPSAT: prediction of protein stability upon point mutations
http://bioinformatics.ksu.edu/bindn/ BindN: a web-based tool for efficient prediction of DNA and RNA binding sites in amino acid sequences
http://www.bioinfo.tsinghua.edu.cn/~tigerchen/memo.html MeMo: a web tool for prediction of protein methylation modifications
http://bioinformatics.lcd-ustc.org/sumosp/ SUMOsp: a web server for sumoylation site prediction
http://modi.uos.ac.kr/modi/ MOD<I><SUP>i</SUP></I> : a powerful and convenient web server for identifying multiple post-translational peptide modifications from tandem mass spectra
http://www.unimod.org MOD<I><SUP>i</SUP></I> : a powerful and convenient web server for identifying multiple post-translational peptide modifications from tandem mass spectra
http://miracle.igib.res.in/dynavac/ DyNAVacS: an integrative tool for optimized DNA vaccine design
http://neuroproteomics.scs.uiuc.edu/neuropred.html NeuroPred: a tool to predict cleavage sites in neuropeptide precursors and provide the masses of the resulting peptides
http://bioinformatics.biol.rug.nl/websoftware/bagel BAGEL: a web-based bacteriocin genome mining tool
http://genealign.hccvs.hc.edu.tw GeneAlign: a coding exon prediction tool based on phylogenetical comparisons
http://www-micrel.deis.unibo.it/~tom/ TOM: a web-based integrated approach for identification of candidate disease genes
http://wego.genomics.org.cn WEGO: a web tool for plotting GO annotations
http://wego2.genomics.org.cn WEGO: a web tool for plotting GO annotations
http://wego.genomics.com.cn WEGO: a web tool for plotting GO annotations
http://bioinfow.dep.usal.es/apid/ APID: Agile Protein Interaction DataAnalyzer
http://protemot.csie.ntu.edu.tw/step1.cgi Protemot: prediction of protein binding sites with automatically extracted geometrical templates
http://bioinfo.mc.ntu.edu.tw/protemot/step1.cgi Protemot: prediction of protein binding sites with automatically extracted geometrical templates
http://vakser.bioinformatics.ku.edu/resources/gramm/grammx GRAMM-X public web server for protein&#150protein docking
http://pdg.cnb.uam.es/TSEMA TSEMA: interactive prediction of protein pairings between interacting families
http://abcis.cbs.cnrs.fr/kindock/ kinDOCK: a tool for comparative docking of protein kinase ligands
http://www.sanger.ac.uk/PostGenomics/S_pombe/YOGY/ YOGY: a web-based	integrated database to retrieve protein orthologs and associated Gene Ontology terms
http://toolkit.tuebingen.mpg.de The MPI Bioinformatics Toolkit for protein sequence analysis
http://whipple.cs.vt.edu:8080/virgo VIRGO: computational prediction of gene functions
http://www.jbirc.aist.go.jp/tact/ TACT: Transcriptome Auto-annotation Conducting Tool of H-InvDB
http://dilimot.embl.de DILIMOT: discovery of linear motifs in proteins
http://biominer.bime.ntu.edu.tw/magiicpro MAGIIC-PRO: detecting functional signatures by efficient discovery of long patterns in protein sequences
http://biominer.cse.yzu.edu.tw/magiicpro MAGIIC-PRO: detecting functional signatures by efficient discovery of long patterns in protein sequences
http://www.expasy.org/tools/scanprosite/ ScanProsite: detection of PROSITE signature matches and ProRule-associated functional and structural residues in proteins
http://bio.cs.washington.edu/software.html MicroFootPrinter: a tool for phylogenetic footprinting in prokaryotic genomes
http://meme.nbcr.net MEME: discovering and analyzing DNA and protein sequence motifs
http://hhsenser.tuebingen.mpg.de/ HHsenser: exhaustive transitive profile search using HMM&#150HMM comparison
http://hhpred.tuebingen.mpg.de/ HHsenser: exhaustive transitive profile search using HMM&#150HMM comparison
http://jafa.burnham.org JAFA: a protein function annotation meta-server
http://oxytricha.princeton.edu/SWAKK/ SWAKK: a web server for detecting positive selection in proteins using a sliding window substitution rate analysis
http://www.cbs.dtu.dk/services/VirtualRibosome/ Virtual Ribosome&#151a comprehensive DNA translation tool with support for integration of sequence feature annotation
http://darwin.uvigo.es/software/gendecoder.html GenDecoder: genetic code prediction for metazoan mitochondria
http://greengenes.lbl.gov/NAST NAST: a multiple sequence alignment server for comparative analysis of 16S rRNA genes
http://www-ab.informatik.uni-tuebingen.de/software CrossLink: visualization and exploration of sequence relationships between (micro) RNAs
http://correlogo.abcc.ncifcrf.gov CorreLogo: an online server for 3D sequence logos of RNA and DNA alignments
http://bioinfo3d.cs.tau.ac.il/ARTS The ARTS web server for aligning RNA tertiary structures
http://pseudoviewer.inha.ac.kr/ PseudoViewer: web application and web service for visualizing RNA pseudoknots and secondary structures
http://bioinfo.csie.ncu.edu.tw/~rnamst/ RNAMST: efficient and flexible approach for identifying RNA structural homologs
http://RegRNA.mbc.NCTU.edu.tw/ RegRNA: an integrated web server for identifying regulatory RNA motifs and elements
http://augustus.gobics.de AUGUSTUS: <I>ab initio</I> prediction of alternative transcripts
http://www.caspur.it/ASPIC/ ASPIC: a web resource for alternative splicing prediction and transcript isoforms characterization
http://asgs.biolinfo.org ASGS: an alternative splicing graph web service
http://siVirus.RNAi.jp/ siVirus: web-based antiviral siRNA design software for highly divergent viral sequences
http://bibiserv.techfak.uni-bielefeld.de/rnahybrid RNAhybrid: microRNA target prediction easy	fast and flexible
http://cbit.snu.ac.kr/~ProMiR2/ ProMiR II: a web server for the probabilistic prediction of clustered	nonclustered	conserved and nonconserved microRNAs
http://egassembler.hgc.jp/ EGassembler: online bioinformatics service for large-scale processing	clustering and assembling ESTs and genomic DNA fragments
http://jphmm.gobics.de/ jpHMM at GOBICS: a web server to detect genomic recombinations in HIV-1
http://brak.sdsc.edu/pub/BiologicalNetworks BiologicalNetworks: visualization and analysis tool for systems biology
http://www.babelomics.org BABELOMICS: a systems biology perspective in the functional annotation of genome-scale experiments
http://bioinfo.curie.fr/CAPweb CAPweb: a bioinformatics CGH array Analysis Platform
http://bioinformatics.bc.edu/clotelab/BTW/ BTW: a web server for Boltzmann time warping of gene expression time series
http://www.gepas.org Next station in microarray data analysis: GEPAS
http://bioinf.xmu.edu.cn/software/geps/geps.php GEPS: the Gene Expression Pattern Scanner
https://carmaweb.genome.tugraz.at CARMAweb: comprehensive R- and bioconductor-based web service for microarray data analysis
http://www.Arabidopsis.leeds.ac.uk/ACT <I>Arabidopsis</I> Co-expression Tool (ACT): web server tools for microarray-based gene expression analysis
http://www.jprogo.de JProGO: a novel tool for the functional interpretation of prokaryotic microarray data using Gene Ontology information
http://www.zincfingertools.org Zinc Finger Tools: custom DNA-binding domains for transcription factors and nucleases
http://hscl.cimr.cam.ac.uk/TFBScluster_genome_portal.html TFBScluster web server for the identification of mammalian composite regulatory elements
http://pdw-24.ipk-gatersleben.de:8080/VOMBAT/ VOMBAT: prediction of transcription factor binding sites using variable order Bayesian trees
http://www.bioinfo.biocenter.helsinki.fi/poxo POXO: a web-enabled tool series to discover transcription factor binding sites
http://www.gene-regulation.com/pub/programs/cma/CMA.html Composite Module Analyst: identification of transcription factor binding site combinations using genetic algorithm
http://www.biobase.de Composite Module Analyst: identification of transcription factor binding site combinations using genetic algorithm
http://bibiserv.techfak.uni-bielefeld.de/jpredictor jPREdictor: a versatile tool for the prediction of <I>cis</I>-regulatory elements
http://ceas.cbi.pku.edu.cn CEAS: <I>cis</I>-regulatory element annotation system
http://stubb.rockefeller.edu/ Stubb: a program for discovery and analysis of <I>cis</I>-regulatory modules
http://www.sfu.ca/~ibajic/NXSensor/ NXSensor web tool for evaluating DNA for nucleosome exclusion sequences and accessibility to binding factors
http://www.pesolelab.it/modtools/ MoD Tools: regulatory motif discovery in nucleotide sequences from co-regulated or homologous genes
http://www.beacon.unimi.it/modtools/ MoD Tools: regulatory motif discovery in nucleotide sequences from co-regulated or homologous genes
http://biochip.nchu.edu.tw/crsd1/ CRSD: a comprehensive web server for composite regulatory signature discovery
http://bips.u-strasbg.fr/PromAn PromAn: an integrated knowledge-based web server dedicated to promoter analysis
http://www.cdfd.org.in/icr/ iCR: a web tool to identify conserved targets of a regulatory protein across the multiple related prokaryotic species
http://tico.gobics.de/ TICO: a tool for postprocessing the predictions of prokaryotic translation initiation sites
http://genome.gbf.de/featurescan/ FeatureScan: revealing property-dependent similarity of nucleotide sequences
http://hobit.sourceforge.net/ FeatureScan: revealing property-dependent similarity of nucleotide sequences
http://msa.cgb.ki.se Kalign	Kalignvu and Mumsa: web servers for multiple sequence alignment
http://www.tcoffee.org/ PROTOGENE: turning amino acid alignments into bona fide CDS nucleotide alignments
http://www.tcoffee.org/ Expresso: automatic incorporation of structural information in multiple sequence alignments using 3D-Coffee
http://www.bork.embl.de/pal2nal PAL2NAL: robust conversion of protein sequence alignments into the corresponding codon alignments
http://aba.nbcr.net/ AliWABA: alignment on the web through an A-Bruijn approach
http://www.mcb.mcgill.ca/~blanchem/FootPrinter3 FootPrinter3: phylogenetic footprinting in partially alignable sequences
http://pupasuite.bioinfo.cipf.es PupaSuite: finding functional single nucleotide polymorphisms for large-scale genotyping purposes
http://www.pupasnp.org PupaSuite: finding functional single nucleotide polymorphisms for large-scale genotyping purposes
http://vortex.cs.wayne.edu/Projects.html New Onto-Tools: Promoter-Express	nsSNPCounter and Onto-Translate
http://pda.uab.es/ PDA v.2: improving the exploration and estimation of nucleotide polymorphism in large datasets of heterogeneous DNA
http://fastsnp.ibms.sinica.edu.tw FASTSNP: an always up-to-date and extendable service for SNP function analysis and prioritization
http://snpnavigator.net/ SNP@Domain: a web resource of single nucleotide polymorphisms (SNPs) within protein domain structures and sequences
http://bioportal.net/ SNP@Domain: a web resource of single nucleotide polymorphisms (SNPs) within protein domain structures and sequences
http://www.pantherdb.org/tools Applications for protein sequence&#150function evolution data: mRNA/protein expression analysis and coding SNP scoring tools
http://bioinfo.ebc.ee/snpmasker/ SNPmasker: automatic masking of SNPs and repeats across eukaryotic genomes
http://bioinformatics.pbcbasc.latrobe.edu.au/ssrdiscovery.html <I>SSRPrimer</I> and <I>SSR Taxonomy Tree</I>: Biome SSR discovery
http://bioinfo.bsd.uchicago.edu/MutScreener.html MutScreener: primer design tool for PCR-direct sequencing
http://ps.cb.k.u-tokyo.ac.jp PrimerStation: a highly specific multiplex genomic PCR primer design server for the human genome
http://cgi-www.daimi.au.dk/cgi-chili/GeMprospector/main GeMprospector&#151online design of cross-species genetic marker candidates in legumes and grasses
http://bioinformatics.ramapo.edu/QGRS/ QGRS Mapper: a web-based server for predicting G-quadruplexes in nucleotide sequences
http://miracle.igib.res.in/quadfinder/ Quadfinder: server for identification and analysis of quadruplex-forming motifs in nucleotide sequences
http://tubic.tju.edu.cn/GC-Profile/ GC-Profile: a web-based tool for visualizing and analyzing the variation of GC content in genomic sequences
http://corgen.molgen.mpg.de CorGen&#151measuring and generating long-range correlations for DNA sequence analysis
http://algorithm.cs.nthu.edu.tw/tools/SPRING/ SPRING: a tool for the analysis of genome rearrangement using reversals and block-interchanges
http://darwin.uvigo.es/software/modeltest_server.html ModelTest Server: a web-based tool for the statistical selection of models of nucleotide substitution online
http://its2.bioapps.biozentrum.uni-wuerzburg.de The internal transcribed spacer 2 database&#151a web server for (not only) low level phylogenetic analyses
http://bioinformatics.abc.hu/PLOTREP/ PLOTREP: a web tool for defragmentation and visual analysis of dispersed genomic repeats
http://path-a.cs.ualberta.ca The Path-A metabolic pathway prediction web server
http://kobas.cbi.pku.edu.cn KOBAS server: a web-based platform for automated annotation and pathway identification
http://bioinformatics.leeds.ac.uk/shark/ metaSHARK: a WWW platform for interactive exploration of metabolic networks
http://taverna.sourceforge.net/ Taverna: a tool for building and running workflows of services
http://www.casper.organ.su.se/casper/ GlyNest and CASPER: two independent approaches to estimate <SUP>1</SUP>H and <SUP>13</SUP>C NMR shifts of glycans available through a common web-interface
http://www.glycosciences.de GlyNest and CASPER: two independent approaches to estimate <SUP>1</SUP>H and <SUP>13</SUP>C NMR shifts of glycans available through a common web-interface
http://www.glycosciences.de/sweetdb/start.php?action=form_shift_estimation GlyNest and CASPER: two independent approaches to estimate <SUP>1</SUP>H and <SUP>13</SUP>C NMR shifts of glycans available through a common web-interface
http://bioserv.rpbs.jussieu.fr/FAFDrugs.html FAF-Drugs: free ADME/tox filtering of compound collections
http://www.hubmed.org/ HubMed: a web-based biomedical literature search interface
http://botdb.abcc.ncifcrf.gov botXminer: mining biomedical literature with a new web-based application

## Sheet: URLs-2007
http://www.ebi.ac.uk/Tools/webservices Web Services at the European Bioinformatics Institute
http://invention.swmed.edu/etblast/etblast.shtml eTBLAST: a web server to identify expert reviewers	appropriate journals and similar publications
http://cargo.bioinfo.cnio.es CARGO: a web portal to integrate customized biological information
http://www.ihop-net.org/UniPub/iHOP/info/logs/ iHOP web services
http://phylogenomics.berkeley.edu Berkeley Phylogenomics Group web servers: resources for structural phylogenomic analysis
http://www.cs.nuim.ie/distributed/multiphyl.php MultiPhyl: a high-throughput phylogenomics webserver using distributed computing
http://phylemon.bioinfo.cipf.es Phylemon: a suite of web tools for molecular evolution	phylogenetics and phylogenomics
http://basic.northwestern.edu/biotools/OligoCalc.html OligoCalc: an online oligonucleotide properties calculator
http://www.bioinf.seu.edu.cn/Recombination/rf_dymhc.htm RF-DYMHC: detecting the yeast meiotic recombination hotspots and coldspots by random forest model using gapped dinucleotide composition features
http://crispr.u-psud.fr/Server/CRISPRfinder.php CRISPRFinder: a web tool to identify clustered regularly interspaced short palindromic repeats
http://code.google.com/p/repk REPK: an analytical web server to select restriction endonucleases for terminal restriction fragment length polymorphism analysis
http://rocaplab.ocean.washington.edu/tools/repk REPK: an analytical web server to select restriction endonucleases for terminal restriction fragment length polymorphism analysis
http://genepipe.ngc.sinica.edu.tw/primerz/ PrimerZ: streamlined primer design for promoters	exons and human SNPs
http://www.ensembl.org PrimerZ: streamlined primer design for promoters	exons and human SNPs
http://frodo.wi.mit.edu/cgi-bin/primer3/primer3_www.cgi PrimerZ: streamlined primer design for promoters	exons and human SNPs
http://oblab.cs.nchu.edu.tw:8080/WebSDL/ NTMG (N-terminal Truncated Mutants Generator for cDNA): an automatic multiplex PCR assays design for generating various N-terminal truncated cDNA mutants
http://www.bioinformatics.nl/primer3plus Primer3Plus	an enhanced web interface to Primer3
http://www.asterias.info Asterias: integrated analysis of expression and aCGH data using an open-source	web-based	parallelized software suite
http://isacgh.bioinfo.cipf.es ISACGH: a web-based environment for the analysis of Array CGH and gene expression which includes functional profiling
http://www.gepas.org ISACGH: a web-based environment for the analysis of Array CGH and gene expression which includes functional profiling
http://www.magma-fgcz.uzh.ch MAGMA: analysis of two-channel microarrays made easy
http://www.fatigoplus.org FatiGO +: a functional profiling tool for genomic data. Integration of functional annotation	regulatory motifs and interaction data with microarray experiments
http://www.babelomics.org FatiGO +: a functional profiling tool for genomic data. Integration of functional annotation	regulatory motifs and interaction data with microarray experiments
http://mml.sjtu.edu.cn/MobilomeFINDER MobilomeFINDER: web-based tools for <I>in silico</I> and experimental discovery of bacterial genomic islands
http://biocomp.bioen.uiuc.edu/oscar Cross-species microarray analysis with the OSCAR system suggests an INSR-<B>&gt</B>Pax6-<B>&gt</B>NQO1 neuro-protective pathway in aging and Alzheimer's disease
http://bioinformoodics.jhmi.edu/quickSNP.pl <I>QuickSNP</I>: an automated web server for selection of tagSNPs
http://fgf.genomics.org.cn/ FGF: A web tool for Fishing Gene Family in a whole genome database
http://genomes.urv.es/OPTIMIZER OPTIMIZER: a web server for optimizing the codon usage of DNA sequences
http://www.sysbiology.org/CodonO CodonO: codon usage bias analysis within and across genomes
http://www.conifergdb.org/software/wtm WebTraceMiner: a web service for processing and mining EST sequence trace files
http://estexplorer.biolinfo.org ESTExplorer: an expressed sequence tag (EST) assembly and annotation platform
http://www4.rothamsted.bbsrc.ac.uk/whets Wheat Estimated Transcript Server (WhETS): a tool to provide best estimate of hexaploid wheat transcript sequence
http://www.cgl.ucsf.edu/Research/genentech/genehub-gepis/ GeneHub-GEPIS: digital expression profiling for normal and cancer tissues based on an integrated gene database
http://www.gepis.org/ GeneHub-GEPIS: digital expression profiling for normal and cancer tissues based on an integrated gene database
http://estpass.kobic.re.kr/ ESTpass: a web-based server for processing and annotating expressed sequence tag (EST) sequences
http://dna.bio.puc.cl/SAGExplore.html SAGExplore: a web server for unambiguous tag mapping in serial analysis of gene expression oriented to gene discovery and annotation
http://david.niaid.nih.gov DAVID Bioinformatics Resources: expanded annotation database and novel algorithms to better extract biology from large gene lists
http://bioinfoserver.rsbs.anu.edu.au/utils/PathExpress/ PathExpress: a web-based tool to identify relevant pathways in gene expression data
http://www.genome.jp/kegg/kaas/ KAAS: an automatic genome annotation and pathway reconstruction server
http://genetrail.bioinf.uni-sb.de GeneTrail&#151advanced gene set enrichment analysis
http://biit.cs.ut.ee/gprofiler/ g:Profiler&#151a web-based toolset for functional profiling of gene lists from large-scale experiments
http://vortex.cs.wayne.edu/projects.htm Onto-Tools: new additions and improvements in 2006
http://www.ogic.ca/projects/g2d_2/ Update of the G2D tool for prioritization of gene candidates to inherited diseases
http://fraenkel.mit.edu/webmotifs WebMOTIFS: automated discovery	filtering and scoring of DNA sequence motifs using multiple programs and Bayesian approaches
http://cg1.iis.sinica.edu.tw/~mybs/ MYBS: a comprehensive web server for mining transcription factor binding sites in yeast
http://melina.hgc.jp Melina II: a web tool for comparisons among several predictive algorithms to find potential motifs from promoter regions
http://bayesweb.wadsworth.org/gibbs/gibbs.html The Gibbs Centroid Sampler
http://bioinformatics.wustl.edu/webTools/portalModule/PromoterSearch.do PAP: a comprehensive workbench for mammalian transcriptional regulatory sequence analysis
http://www.cisreg.ca/oPOSSUM/ oPOSSUM: integrated tools for analysis of regulatory motif over-representation
http://www.benoslab.pitt.edu/stamp STAMP: a web tool for exploring DNA-binding motif similarities
http://genie.dartmouth.edu/scope SCOPE: a web server for practical <I>de novo</I> motif discovery
http://tlife.fudan.edu.cn/ltr_finder/ LTR_FINDER: an efficient tool for the prediction of full-length LTR retrotransposons
http://www.riboclub.org/rtanalyzer RTAnalyzer: a web application for finding new retrotransposons and detecting L1 retrotransposition signatures
http://www.flugenome.org/ FluGenome: a web tool for genotyping influenza A virus
http://www.ncbi.nlm.nih.gov/genomes/FLU/Database/annotation.cgi FLAN: a web server for influenza virus genome annotation
http://www.cs.umd.edu/projects/SplicePort SplicePort&#151An interactive splice-site analysis tool
http://www.spliceport.org SplicePort&#151An interactive splice-site analysis tool
http://bip.umiacs.umd.edu:8080/ BIPASS: BioInformatics Pipeline Alternative Splicing Services
http://genome.imim.es/astalavista ASTALAVISTA: dynamic and flexible analysis of alternative splicing events in custom gene datasets
http://datalab.njit.edu/biodata/rna/RSmatch/server.htm RADAR: a web server for RNA data analysis and research
http://www.ccrnp.ncifcrf.gov/~bshapiro/ RADAR: a web server for RNA data analysis and research
http://bioinformatics.bc.edu/clotelab/RNAbor RNAbor: a web server for RNA structural neighbors
http://www.bioinf.uni-freiburg.de/Software/INFO-RNA/ INFO-RNA&#151a server for fast inverse RNA folding satisfying sequence constraints
http://biosrv1.bmi.ac.cn/RSRE/ RSRE: RNA structural robustness evaluator
http://biotech.bmi.ac.cn/RSRE/ RSRE: RNA structural robustness evaluator
http://bibiserv.techfak.uni-bielefeld.de/pknotsrg pknotsRG: RNA pseudoknot folding including near-optimal structures and sliding windows
http://compbio.cs.sfu.ca/taverna taveRNA: a web suite for RNA algorithms and applications
http://bibiserv.techfak.uni-bielefeld.de/rnamovies RNA Movies 2: sequential animation of RNA secondary structures
http://rna.tbi.univie.ac.at/RNAz The RNAz web server: prediction of thermodynamically stable and evolutionarily conserved RNA structures
http://www.bioinf.seu.edu.cn/miRNA/ MiPred: classification of real and pseudo microRNA precursors using random forest prediction model with combined features
http://cpc.cbi.pku.edu.cn CPC: assess the protein-coding potential of transcripts using sequence features and support vector machine
http://tfam.lcb.uu.se TFAM 1.0: an online tRNA function classifier
http://www.bioinfotool.org/domac.html DOMAC: an accurate	hybrid protein domain prediction server
http://pipe.scs.fsu.edu PI<SUP>2</SUP>PE: protein interface/interior prediction engine
http://www.fiserlab.org/servers/m4t M4T: a comparative protein structure modeling server
http://pcons.net Pcons.net: protein structure prediction meta server
http://molprobity.biochem.duke.edu MolProbity: all-atom contacts and structure validation for proteins and nucleic acids
http://glinka.bio.neu.edu/StSNP/ Structure SNP (StSNP): a web server for mapping and modeling nsSNPs on protein structures with linkage to metabolic pathways
http://salilab.org/DBAli/ DBAli tools: mining the protein structure space
http://eF-site.hgc.jp/eF-seek eF-seek: prediction of the functional sites of proteins by searching for similar electrostatic potential and molecular surface shape
http://flipper.services.came.sbg.ac.at NQ-Flipper: recognition and correction of erroneous asparagine and glutamine side-chain rotamers in protein structures
https://prosa.services.came.sbg.ac.at ProSA-web: interactive web service for the recognition of errors in three-dimensional structures of proteins
http://qscop-blast.services.came.sbg.ac.at/ QSCOP-BLAST&#151fast retrieval of quantified structural information for protein sequences of unknown structure
http://3dlogo.uniroma2.it/ 3dLOGO: a web server for the identification	analysis and use of conserved protein substructures
http://knots.mit.edu Protein knot server: detection of knots in protein structures
http://phobius.cgb.ki.se Advantages of combined transmembrane topology and signal peptide prediction&#151;the Phobius web server
http://phobius.binf.ku.dk Advantages of combined transmembrane topology and signal peptide prediction&#151;the Phobius web server
http://myhits.isb-sib.ch MyHits: improvements to an interactive resource for analyzing protein sequences
http://fastSCOP.life.nctu.edu.tw fastSCOP: a fast web server for recognizing protein structural domains and SCOP superfamilies
http://genius.embnet.dkfz-heidelberg.de/menu/biounit/open-husar/ ProtSweep	2Dsweep and DomainSweep: protein analysis suite at DKFZ
http://cbm.bio.uniroma2.it/SH3-Hunter/ SH3-Hunter: discovery of SH3 domain interaction sites in proteins
http://bioware.ucd.ie/~slimdisc/ The SLiMDisc server: short	linear motif discovery in proteins
http://prdos.hgc.jp PrDOS: prediction of disordered protein regions from amino acid sequence
http://biominer.bime.ntu.edu.tw/ipda iPDA: integrated protein disorder analyzer
http://biominer.cse.yzu.edu.tw/ipda iPDA: integrated protein disorder analyzer
http://lorentz.dynstr.pasteur.fr/joel/index.php MinActionPath: maximum likelihood trajectory for large-scale structural transitions in a coarse-grained locally harmonic energy landscape
http://bioserv.rpbs.jussieu.fr/PMG.html PMG: online generation of high-quality molecular pictures and storyboarded animations
http://sage.csb.yale.edu/sitefinder3d siteFiNDER|3D: a web-based tool for predicting the location of functional sites in proteins
http://www.ibi.vu.nl/programs/seqharmwww Sequence harmony: detecting functional specificity from alignments
http://fralanyzer.cse.buffalo.edu/ FRalanyzer: a tool for functional analysis of fold-recognition sequence&#150;structure alignments
http://sunserver.cdfd.org.in:8080/protease/PAR_3D/index.html PAR-3D: a server to predict protein active site residues
http://selecton.bioinfo.tau.ac.il Selecton 2007: advanced models for detecting positive and purifying selection using a Bayesian inference approach
http://bip.weizmann.ac.il/dipol A server and database for dipole moments of proteins
http://pdb2pqr.sourceforge.net/ PDB2PQR: expanding and upgrading automated preparation of biomolecular structures for molecular simulations
http://pfp.technion.ac.il Patch Finder Plus (PFplus): A web server for extracting and displaying positive electrostatic patches on protein surfaces
http://wishart.biology.ualberta.ca/rci The RCI server: rapid and accurate calculation of protein flexibility using chemical shifts
http://bioinf.xmu.edu.cn/software/cytosvm/cytosvm.php CytoSVM: an advanced server for identification of cytokine-receptor interactions
http://bip.weizmann.ac.il/promate ProMateus&#151;an open research approach to protein-binding sites analysis
http://www.nii.res.in/modpropep.html MODPROPEP: a program for knowledge-based modeling of protein&#150;peptide complexes
http://3D-partner.life.nctu.edu.tw 3D-partner: a web server to infer interacting partners and binding models
http://bioserv.rpbs.jussieu.fr/Frog.html Frog: a FRee Online druG 3D conformation generator
http://firedb.bioinfo.cnio.es/Php/FireStar.php <I>firestar</I>&#151;prediction of functionally important residues using structural templates and alignment reliability
http://bindr.gdcb.iastate.edu/RNABindR RNABindR: a server for analyzing and predicting RNA-binding sites in proteins
http://KinasePhos2.mbc.nctu.edu.tw/ KinasePhos 2.0: a web server for identifying protein kinase-specific phosphorylation sites based on sequences and coupling patterns
http://www.canpredict.org/ CanPredict: a computational tool for predicting cancer-associated missense mutations
http://www.cgl.ucsf.edu/Research/genentech/canpredict/ CanPredict: a computational tool for predicting cancer-associated missense mutations
http://bindr.gdcb.iastate.edu/ZiFiT/ Zinc Finger Targeter (ZiFiT): an engineered zinc finger/target site design tool
http://www.lipidmaps.org/tools/ LIPID MAPS online tools for lipid research
http://scopes.biologie.hu-berlin.de MetaPath Online: a web server implementation of the network expansion algorithm
http://deep.bioinf.med.uni-goettingen.de DEEP&#151;A tool for differential expression effector prediction
http://visant.bu.edu VisANT 3.0: new modules for pathway visualization	editing	prediction and construction
http://indelscan.genomics.sinica.edu.tw/IndelScan/ INDELSCAN: a web server for comparative identification of species-specific and non-species-specific insertion/deletion events
http://140.113.239.131/RE-MUSIC RE-MuSiC: a tool for multiple sequence alignment with regular expression constraints
http://www.tcoffee.org The M-Coffee web server: a meta-method for computing multiple sequence alignments by combining alternative alignment methods
http://prodata.swmed.edu/promals/ PROMALS web server for accurate multiple protein sequence alignments
http://prodata.swmed.edu/compass COMPASS server for remote homology inference
http://bioinformatics.bc.edu/clotelab/DIAL DIAL: a web server for the pairwise alignment of two RNA three-dimensional structures using nucleotide	dihedral angle and base-pairing similarities
http://genome.lbl.gov/vista Multiple whole genome alignments and novel biomedical applications at the VISTA portal
http://probalign.njit.edu eProbalign: generation and manipulation of multiple sequence alignments using partition function posterior probabilities
http://oxytricha.princeton.edu/BlastO BLASTO: a tool for searching orthologous groups
http://www.bioinf.uni-sb.de/sepacs SePaCS&#151;a web-based application for classification of seroreactivity profiles
http://biwww3.informatik.uni-freiburg.de:8080/BioBayesNet/ BioBayesNet: a web server for feature extraction and Bayesian network modeling of biological sequence data
http://bioinformatics.bmc.uu.se/evaller.html EVALLER: a web server for <I>in silico</I> assessment of potential protein allergenicity
http://prosightptm2.scs.uiuc.edu ProSight PTM 2.0: improved protein identification and characterization for top down mass spectrometry
http://ms.iis.sinica.edu.tw/Multi-Q-Web The Multi-Q web server for multiplexed protein quantitation
http://www.chem.cuhk.edu.hk/DSHIFT DSHIFT: a web server for predicting DNA chemical shifts
http://btweb.aua.gr/crystwiv/ CrystTwiV: a webserver for automated phase extension and refinement in X-ray crystallography

## Sheet: URLs-2008
http://bioinformatics.ca/links_directory/ Keeping pace with the data: 2008 update on the Bioinformatics Links Directory
http://bioinfomatics.ca/links_directory/narweb2008/ Keeping pace with the data: 2008 update on the Bioinformatics Links Directory
http://nar.oxfordjournals.org/ Keeping pace with the data: 2008 update on the Bioinformatics Links Directory
http://www.ncbi.nlm.nih.gov/blast	NCBI BLAST: a better web interface
http://www.tcoffee.org R-Coffee: a web server for accurately aligning noncoding RNA sequences
http://bioinfo.lifl.fr/magnolia MAGNOLIA: multiple alignment of protein&#8211;coding and structural RNA sequences
http://bioalgorithm.life.nctu.edu.tw/SARSA/ SARSA: a web tool for structural alignment of RNA using a structural alphabet
http://www.compbio.dundee.ac.uk/www-scanps SCANPS: a web server for iterative protein sequence database searching by dynamic programing	with display in a hierarchical SCOP browser
http://prodata.swmed.edu/promals3d/ PROMALS3D web server for accurate multiple protein sequence and structure alignments
http://imed.med.ucm.es/PVS/ PVS: a web server for protein sequence variability analysis tuned to facilitate conserved epitope discovery
http://webapps.embl-hamburg.de/rapido RAPIDO: a web server for the alignment of protein structures in the presence of conformational changes
http://bioinformatics.charite.de/superimpose Superimpos&eacute;: a 3D structural superposition server
http://bioinformatics.charite.de/superpred SuperPred: drug classification and target prediction
http://www.dahunter.kr DAhunter: a web-based server that identifies homologous proteins by comparing domain architecture
http://localodom.kobic.re.kr/dahunter/index.htm DAhunter: a web-based server that identifies homologous proteins by comparing domain architecture
http://harmony.biowiki.org/xrei/ xREI: a phylo-grammar visualization webserver
http://rna.tbi.univie.ac.at/ The Vienna RNA Websuite
http://software.ncrna.org	Software.ncrna.org: web servers for analyses of RNA sequences
http://genome.ku.dk/resources/war WAR: Webserver for aligning structural RNAs
http://www.manet.uiuc.edu/nobai/nobai.php NOBAI: a web server for character coding of geometrical and statistical features in RNA structure
http://rnalogo.mbc.nctu.edu.tw/ RNALogo: a new approach to display structural RNA alignment
http://sysbio.kribb.re.kr/AsiDesigner/ AsiDesigner: exon-based siRNA design server considering alternative splicing
http://rna.urmc.rochester.edu/servers/oligowalk OligoWalk: an online siRNA design tool utilizing hybridization thermodynamics
http://snowwhite.wellesley.edu/targetRNA TargetRNA: a tool for predicting targets of small RNA action in bacteria
http://bioinfo3.noble.org/pssRNAMiner/ pssRNAMiner: a plant short small RNA regulatory cascade analysis server
http://rsat.ulb.ac.be/rsat/ RSAT: regulatory sequence analysis tools
http://bioit.dmbr.ugent.be/ConTra/index.php ConTra: a promoter alignment analysis tool for identification of transcription factor binding sites across species
http://dire.dcode.org DiRE: identifying distant regulatory elements of co-expressed genes
http://mips.gsf.de/genre/proj/orest/index.html OREST: the online resource for EST analysis
http://crispr.u-psud.fr/CRISPRcompar/ CRISPRcompar: a website to compare clustered regularly interspaced short palindromic repeats
http://uprobe.genetics.emory.edu Uprobe 2008: an online resource for universal overgo hybridization-based probe retrieval and design<A NAME="RFN1"></A><SUP><IMG SRC="/math/link/large/dagger.gif" ALT="{dagger}" BORDER="0"></SUP>
http://bioinfo.unice.fr/ohm/	OligoHeatMap (OHM): an online tool to estimate and display hybridizations of oligonucleotides onto DNA sequences
http://mkt.uab.es Standard and generalized McDonald&#8211;Kreitman test: a website to detect selection by comparing different classes of DNA sites
http://www.idtdna.com/SciTools/SciTools.aspx IDT SciTools: a suite for analysis and design of nucleic acid oligomers
http://quma.cdb.riken.jp/ QUMA: quantification tool for methylation analysis
http://bioinfo.ibt.unam.mx/gecont GeConT 2: gene context analysis for orthologous proteins	conserved domains and metabolic pathways
http://stothard.afns.ualberta.ca/cgview_server/ The CGView Server: a comparative genomics tool for circular genomes
http://biunit.naist.jp/homcos HOMCOS: a server to predict interacting protein pairs and interacting sites by homology modeling of complex structures
http://www.compbio.dundee.ac.uk/taro TarO: a target optimisation system for structural biology
http://www.compbio.dundee.ac.uk/jpred The Jpred 3 secondary structure prediction server
http://wishart.biology.ualberta.ca/proteus2 PROTEUS2: a web server for comprehensive protein structure prediction and structure-based annotation
http://bioinfo3d.cs.tau.ac.il/MolAxis MolAxis: a server for identification of channels in macromolecules
http://bioinformatics.bc.edu/clotelab/localmove/ LocalMove: computing on-lattice fits for biopolymers
http://bioinfo3d.cs.tau.ac.il/PharmaGist PharmaGist: a webserver for ligand-based pharmacophore detection
http://bioinfo3d.cs.tau.ac.il/FireDock/ FireDock: a web server for fast interaction refinement in molecular docking<A NAME="RFN1"></A><SUP><IMG SRC="/math/link/large/dagger.gif" ALT="{dagger}" BORDER="0"></SUP>
http://rosettadock.graylab.jhu.edu The RosettaDock server for local protein&#8211;protein docking
http://sitron.bccs.uib.no/dhcl/ Domain Hierarchy and closed Loops (DHcL): a server for exploring hierarchy of protein domain structure
http://sitron.bccs.uib.no/dhcl Domain Hierarchy and closed Loops (DHcL): a server for exploring hierarchy of protein domain structure
http://bigbird.comp.nus.edu.sg/pfa2/ pFlexAna: detecting conformational changes in remotely related proteins
http://soapdb.dyndns.org:3000 <I>soaPDB</I>: a web application for searching the Protein Data Bank	organizing results	and receiving automatic email alerts
http://www.bioinformatics.nl/tools/seqatoms/ SEQATOMS: a web tool for identifying missing regions in PDB in sequence context
http://bioinfo3d.cs.tau.ac.il/MultiBind MultiBind and MAPPIS: webservers for multiple alignment of protein 3D-binding sites and their interactions
http://bioinfo3d.cs.tau.ac.il/MAPPIS MultiBind and MAPPIS: webservers for multiple alignment of protein 3D-binding sites and their interactions
http://kfc.mitchell-lab.org KFC Server: interactive forecasting of protein interaction hot spots
http://www.charmm-gui.org PBEQ-Solver for online visualization of electrostatic potential of biomolecules
http://www.charmm-gui.org/input/pbeqsolver PBEQ-Solver for online visualization of electrostatic potential of biomolecules
http://projects.eml.org/mcm/software/pipsa webPIPSA: a web server for the comparison of protein interaction properties
http://pipsa.eml.org webPIPSA: a web server for the comparison of protein interaction properties
http://guinevere.otago.ac.nz/stats.html GLUE-IT and PEDEL-AA: new programmes for analyzing protein diversity in randomized libraries
http://predikin.biosci.uq.edu.au The Predikin webserver: improved prediction of protein kinase peptide specificity using structural information
http://e1ds.ee.ncku.edu.tw/ E1DS: catalytic site prediction based on 1D signatures of concurrent conservation
http://e1ds.csbb.ntu.edu.tw/ E1DS: catalytic site prediction based on 1D signatures of concurrent conservation
http://3dfun.bioinfo.pl/ 3D-Fun: predicting enzyme function from structure
http://3dfun.cmbi.ru.nl/ 3D-Fun: predicting enzyme function from structure
http://www.gepas.org GEPAS	a web-based tool for microarray data analysis and interpretation
http://bioalgo.iit.cnr.it/amica AMIC@: All MIcroarray Clusterings @ once
http://genecat.mpg.de GeneCAT&#8212;novel webtools that combine BLAST and co-expression analyses
http://www.lgtc.nl/MaRe/ Microarray retriever: a web-based tool for searching and large scale retrieval of public microarray data
http://www.bioinfo.hr/madnet MADNet: microarray database network web server
http://genepipe.ngc.sinica.edu.tw/genowatch GenoWatch: a disease gene mining browser for association study
http://www.babelomics.org Babelomics: advanced functional profiling of transcriptomics	proteomics and genomics experiments
http://webclu.bio.wzw.tum.de/profcom/ ProfCom: a web tool for profiling the complex functionality of gene groups identified from high-throughput data
http://gps-tools2.wustl.edu/onto-cc/index.html Onto-CC: a web server for identifying Gene Ontology conceptual clusters
http://omicslab.genetics.ac.cn/GOEAST/ GOEAST: a web-based software toolkit for Gene Ontology enrichment analysis
http://pals.bioinfo.cnio.es PaLS: filtering common literature	biological terms and pathway information
http://estbioinfo.stat.ub.es/apli/serbgo SerbGO: searching for the best GO tool
http://www.geneontology.org/GO.tools.microarray.shtml#serbgo SerbGO: searching for the best GO tool
http://www.ebi.ac.uk/ols The Ontology Lookup Service: more data and better tools for controlled vocabulary queries
http://www.esat.kuleuven.be/endeavourweb E<SMALL>NDEAVOUR</SMALL> update: a web resource for gene prioritization in multiple species
http://biolit.ucsd.edu BioLit: integrating biological literature with databases
http://bioservices.cse.yzu.edu.tw/BWS BIOSMILE web search: a web application for annotating biomedical entities and relations
http://wishart.biology.ualberta.ca/polysearch PolySearch: a web-based text mining system for extracting relationships between human diseases	genes	mutations	drugs and metabolites
http://services.nbic.nl/cgi-bin/copub/CoPub.pl CoPub: a literature-based keyword enrichment tool for microarray data analysis
http://bi.snu.ac.kr/pie/ PIE: an online prediction system for protein&#8211;protein interactions from text
http://e3miner.biopathway.org E3Miner: a text mining tool for ubiquitin-protein ligases
http://www.genome.jp/kegg/atlas/ KEGG Atlas mapping for global analysis of metabolic pathways
http://umbbd.msi.umn.edu/predict/ The University of Minnesota pathway prediction system: predicting metabolic logic
http://umbbd.msi.umn.edu/ The University of Minnesota pathway prediction system: predicting metabolic logic
https://www.cebitec.uni-bielefeld.de/groups/brf/software/cpa/index.html Comparative Pathway Analyzer&#8212;a web server for comparative analysis	clustering and visualization of metabolic networks in multiple organisms
http://hub.iis.sinica.edu.tw/Hubba Hubba: hub objects analyzer&#8212;a framework of interactome hubs identification for network biology
http://rsat.ulb.ac.be/neat/ NeAT: a toolbox for the analysis of biological networks	clusters	classes and pathways
http://biit.cs.ut.ee/graphweb/ GraphWeb: mining heterogeneous biological networks for gene modules with functional significance
http://www.prodonet.tu-bs.de ProdoNet: identification and visualization of prokaryotic gene regulatory and metabolic networks
http://www.phylogeny.fr/ Phylogeny.fr: robust phylogenetic analysis for the non-specialist
http://www.cmbi.ru.nl/signature Signature	a web server for taxonomic characterization of sequence samples using signature genes
http://bioalgorithm.life.nctu.edu.tw/OGtree/ OGtree: a tool for creating genome trees of prokaryotes based on overlapping genes
http://masstrix.org MassTRIX: mass translator into pathways
http://www.ispider.manchester.ac.uk/cgi-bin/ProteomicSearch.pl ISPIDER Central: an integrated database web-server for proteomics
http://massnet.kr MassNet: a functional annotation service for protein mass spectrometry data
http://sequenceome.kobic.re.kr/MassNet/ MassNet: a functional annotation service for protein mass spectrometry data
http://www.cs23d.ca CS23D: a web server for rapid protein structure generation using NMR chemical shifts and sequence data
http://imgt.cines.fr IMGT/V-QUEST: the highly customized and integrated system for IG and TR standardized V-J and V-D-J sequence analysis
http://www.cbs.dtu.dk/services/NetMHC NetMHC-3.0: accurate web accessible predictions of human	mouse and monkey MHC class I affinities for peptides of length 8&#8211;11
http://tools.immuneepitope.org Immune epitope database analysis resource (IEDB-AR)
http://www.epitoolkit.org EpiToolKit&#8212;a web server for computational immunomics
http://bionmf.dacya.ucm.es bioNMF: a web-based tool for nonnegative matrix factorization in biology

## Sheet: URLs-2009
http://www.xml.nig.ac.jp/index.html Web API for biology with a workflow navigation system
http://cyclamen.ddbj.nig.ac.jp/ Web API for biology with a workflow navigation system
http://biodb.jp/ Hyperlink Management System and ID Converter System: enabling maintenance-free hyperlinks among major biological databases
http://www.biomart.org BioMart Central Portal&#8212;unified access to biological data
http://www.biomart.org/biomart/martview BioMart Central Portal&#8212;unified access to biological data
http://www.Biobike.org BioBIKE: A Web-based	programmable	integrated biological knowledge base
http://weblab.cbi.pku.edu.cn	WebLab: a data-centric	knowledge-sharing bioinformatic platform
http://www.genocad.org Writing DNA with GenoCAD<SUP><SMALL><SMALL>TM</SMALL></SMALL></SUP>
http://www.ibi.vu.nl/programs/prcwww/ webPRC: the Profile Comparer for alignment-based searching of public domain databases
http://sib-blast.osc.edu SIB-BLAST: a web server for improved delineation of true and false positives in PSI-BLAST searches
http://omicspace.riken.jp/ OmicBrowse: a Flash-based high-performance graphics interface for genomic resources
http://sourceforge.net/projects/omicbrowse/ OmicBrowse: a Flash-based high-performance graphics interface for genomic resources
http://ytat2.ijm.univ-paris-diderot.fr/AutoclassAtIJM.html AutoClass@IJM: a powerful tool for Bayesian classification of heterogeneous data in biology
http://web.bioinformatics.cicbiogune.es/microRNA/ miRanalyzer: a microRNA detection and analysis tool for next-generation sequencing experiments
http://www.bioinfolab.org/software/webgmap WebGMAP: a web service for mapping and aligning cDNA sequences to genomes
http://phylofacts.berkeley.edu/orthologs/ Berkeley PHOG: PhyloFacts orthology group prediction web server
http://prodata.swmed.edu/compass COMPASS server for homology detection: improved statistical accuracy	speed and functionality
http://prodata.swmed.edu/compass COMPASS server for homology detection: improved statistical accuracy	speed and functionality
http://maya.ccg.unam.mx/primers4clades/and primers4clades: a web server that uses phylogenetic trees to design lineage-specific PCR primers for metagenomic and diversity studies
http://floresta.eead.csic.es/primers4clades/ primers4clades: a web server that uses phylogenetic trees to design lineage-specific PCR primers for metagenomic and diversity studies
http://orphelia.gobics.de Orphelia: predicting genes in metagenomic sequencing reads
http://www.cs.tau.ac.il/~bnet/torque.html Torque: topology-free querying of protein interaction networks
http://snow.bioinfo.cipf.es SNOW	a web-based tool for the statistical analysis of protein&#8211;protein interaction networks
http://visant.bu.edu VisANT 3.5: multi-scale network visualization	analysis and inference based on the gene ontology
http://www.dasmiweb.de DASMIweb: online integration	analysis and assessment of distributed protein interaction data
http://FMM.mbc.nctu.edu.tw/ FMM: a web server for metabolic pathway reconstruction and comparative analysis
http://www.litinspector.org/ LitInspector: literature and signal transduction pathway mining in PubMed abstracts
http://cbdm.mdc-berlin.de/tools/medlineranker MedlineRanker: flexible ranking of biomedical literature
http://omicspace.riken.jp/ PosMed (Positional Medline): prioritizing genes with an artificial neural network comprising medical documents to accelerate positional cloning
http://sent.dacya.ucm.es SENT: semantic features in text
http://zope.bioinfo.cnio.es/plan2l PLAN2L: a web tool for integrated text mining and literature-based bioentity relation extraction
http://gendoo.dbcls.jp/ Gendoo: Functional profiling of gene and disease features using MeSH vocabulary
http://bioportal.bioontology.org BioPortal: ontologies and integrated data resources at the click of a mouse
http://tlife.fudan.edu.cn/cvtree CVTree update: a newly designed phylogenetic study platform using composition vectors and whole genomes
http://www.ibi.vu.nl/programs/phylopars/ PhyloPars: estimation of missing parameter values using phylogeny
http://orthoselect.gobics.de OrthoSelect: a web server for selecting orthologous gene alignments from EST sequences
http://sroogle.tau.ac.il SROOGLE: webserver for integrative	user-friendly visualization of splicing signals
http://rulai.cshl.edu/SCPD/ RegAnalyst: a web interface for the analysis of regulatory motifs	networks and pathways
http://www.nii.ac.in/~deepak/RegAnalyst RegAnalyst: a web interface for the analysis of regulatory motifs	networks and pathways
http://meme.nbcr.net MEME S<SMALL>UITE</SMALL>: tools for motif discovery and searching
http://uniprime.batlab.eu UniPrime2: a web service providing easier Universal Primer design
http://prime.ibn.a-star.edu.sg TmPrime: fast	flexible oligonucleotide design software for gene synthesis
https://icodehop.cphi.washington.edu/i-codehop-context/Welcome iCODEHOP: a new interactive program for designing COnsensus-DEgenerate Hybrid Oligonucleotide Primers from multiply aligned protein sequences
http://insignia.cbcb.umd.edu Insignia: a DNA signature search web server for diagnostic assay development
http://haddock.chem.uu.nl/dna 3D-DART: a DNA structure modelling server
http://w3dna.rutgers.edu Web 3DNA&#8212;a web server for the analysis	reconstruction	and visualization of three-dimensional nucleic-acid structures
http://www.beaconlab.it/pscan Pscan: finding over-represented transcription factor binding site motifs in sequences from co-regulated or co-expressed genes
http://prep.unl.edu/ The PREP suite: predictive RNA editors for plant mitochondrial genes	chloroplast genes and user-defined alignments
http://sgu.bioinfo.cipf.es/services/SARA/ SARA: a server for function annotation of RNA structures
http://www.mirz.unibas.ch MirZ: an integrated microRNA expression atlas and target prediction resource
http://www.microrna.gr/microT DIANA-microT web server: elucidating microRNA functions through target prediction
http://www.ncrna.org/centroidfold/ C<SMALL>ENTROID</SMALL>F<SMALL>OLD</SMALL>: a web server for RNA secondary structure prediction
http://bioinformatics.bc.edu/clotelab/RNAmutants/ RNAmutants: a web server to explore the mutational landscape of RNA secondary structures
http://rnamutants.csail.mit.edu/ RNAmutants: a web server to explore the mutational landscape of RNA secondary structures
http://bioalgorithm.life.nctu.edu.tw/FASTR3D/ FASTR3D: a fast and accurate search tool for similar RNA 3D structures
http://microbe.vital-it.ch/ The Microbe browser for comparative genomics
http://microbe.vital-it.ch/api The Microbe browser for comparative genomics
http://gopubmed.org/gogene GoGene: gene annotation in the fast lane
http://toppgene.cchmc.org ToppGene Suite for gene list enrichment analysis and candidate gene prioritization
http://www.mgene.org/web <I>mGene.web</I>: a web service for accurate computational gene finding
http://genecodis.dacya.ucm.es GeneCodis: interpreting gene lists through enrichment analysis and integration of diverse biological information
http://mips.helmholtz-muenchen.de/proj/gene2mir/ GeneSet2miRNA: finding the signature of cooperative miRNA activities in the gene lists
http://www.whichgenes.org/ WhichGenes: a web-based tool for gathering	building	storing and exporting gene sets with application in gene set enrichment analysis
http://www.whichgenes.org/api/ WhichGenes: a web-based tool for gathering	building	storing and exporting gene sets with application in gene set enrichment analysis
http://bioinfoserver.rsbs.anu.edu.au/utils/PathExpress/ PathExpress update: the enzyme neighbourhood method of associating gene-expression data with metabolic pathways
http://bioinfo.cipf.es/gesbap/ Gene set-based analysis of polymorphisms: finding pathways or biological processes associated to traits in genome-wide association studies
http://bioinformatics.clemson.edu/G-SESAME G-SESAME: web tools for GO-term-based gene similarity analysis and knowledge discovery
http://piech.kaist.ac.kr/cofeco COFECO: composite function annotation enriched by protein complex data
http://www.clantox.cs.huji.ac.il ClanTox: a classifier of short animal toxins
http://gemdock.life.nctu.edu.tw/ppisearch/ PPISearch: a web server for searching homologous protein&#8211;protein interactions across multiple species
http://loschmidt.chemi.muni.cz/hotspotwizard/ HotSpot Wizard: a web server for identification of hot spots in protein engineering
http://pocket.uchicago.edu/ SplitPocket: identification of protein functional surfaces and characterization of their spatial patterns
http://phylogenomics.berkeley.edu/intrepid INTREPID: a web server for prediction of functionally important residues by evolutionary analysis
http://protedna.csbb.ntu.edu.tw/ ProteDNA: a sequence-based predictor of sequence-specific DNA-binding residues in transcription factors
http://protedna.csie.ntu.edu.tw/ ProteDNA: a sequence-based predictor of sequence-specific DNA-binding residues in transcription factors
http://bio222.esoe.ntu.edu.tw/ProteDNA/ ProteDNA: a sequence-based predictor of sequence-specific DNA-binding residues in transcription factors
http://xtal.nki.nl/ccd	<I>ProteinCCD</I>: enabling the design of protein truncation constructs for expression and crystallization experiments
http://SePreSA.Bio-X.cn/ SePreSA: a server for the prediction of populations susceptible to serious adverse drug reactions implementing the methodology of a chemical&#8211;protein interactome
http://sitehound.sanchezlab.org SITEHOUND-web: a server for ligand binding site identification in protein structures
http://www.biotec.or.th/isl/Domix d-Omix: a mixer of generic protein domain analysis tools
http://phemto.orgchm.bas.bg/ PHEMTO: protein pH-dependent electric moment tools
http://www.bioinformatics.nl/progmap ProGMap: an integrated annotation resource for protein orthology
http://annie.bii.a-star.edu.sg ANNIE: integrated <I>de novo</I> protein sequence annotation
http://botdb.abcc.ncifcrf.gov/toxin/kiConverter.jsp <I>IC</I><SUB>50</SUB>-to-<I>K</I><SUB>i</SUB>: a web-based tool for converting <I>IC</I><SUB>50</SUB> to <I>K</I><SUB>i</SUB> values for inhibitors of enzyme activity and ligand binding
http://toolkit.tuebingen.mpg.de/hhomp HHomp&#8212;prediction and classification of outer membrane proteins
http://www.nipgr.res.in/plecdom.html PLecDom: a program for identification and analysis of plant lectin domains
http://biodev.extra.cea.fr/rasmot3d/ RASMOT-3D PRO: a 3D motif search webserver
http://topcons.net/ TOPCONS: consensus prediction of membrane protein topology
http://cssp2.sookmyung.ac.kr/ NetCSSP: web application for predicting chameleon sequences and amyloid fibril formation
http://antibody.graylab.jhu.edu RosettaAntibody: antibody variable region homology modeling server
http://antibody.graylab.jhu.edu RosettaAntibody: antibody variable region homology modeling server
http://www.zbh.uni-hamburg.de/salami The SALAMI protein structure search server
http://abcis.cbs.cnrs.fr/AT2/ @TOME-2: a new pipeline for comparative modeling of protein&#8211;ligand complexes
http://compbio.soe.ucsc.edu/SAM_T08/T08-query.html SAM-T08	HMM-based protein structure prediction
http://bioserv.rpbs.univ-paris-diderot.fr/PEP-FOLD PEP-FOLD: an online resource for <I>de novo</I> peptide structure prediction
http://bioserv.rpbs.univ-paris-diderot.fr/wwLigCSRre.html wwLigCSRre: a 3D ligand-based server for hit identification and optimization
http://swissmodel.expasy.org/qmean QMEAN server for protein model quality estimation
http://casp.rnet.missouri.edu/nncon.html NNcon: improved protein contact map prediction using 2D-recursive neural networks
http://protinfo.compbio.washington.edu/ppc/ Protinfo PPC: A web server for atomic level prediction of protein complexes
http://prodata.swmed.edu/ProSMoS/ ProSMoS server: a pattern-based search using interaction matrix representation of protein structures
http://prodata.swmed.edu/horaserver HorA web server to infer homology between proteins using sequence and structural similarity
http://cops.services.came.sbg.ac.at/ COPS&#8212;a novel workbench for explorations in fold space
http://sarst.life.nthu.edu.tw/iSARST/ <I>i</I>SARST: an integrated SARST web server for rapid protein structural similarity searches
http://seemotif.csie.ntu.edu.tw	seeMotif: exploring and visualizing sequence motifs in 3D structures
http://seemotif.ee.ncku.edu.tw seeMotif: exploring and visualizing sequence motifs in 3D structures
http://seemotif.csbb.ntu.edu.tw seeMotif: exploring and visualizing sequence motifs in 3D structures
http://bioinfo.mc.ntu.edu.tw/slither/or SLITHER: a web server for generating contiguous conformations of substrate molecules entering into deep active sites of proteins or migrating through channels in membrane transporters
http://slither.rcas.sinica.edu.tw/ SLITHER: a web server for generating contiguous conformations of substrate molecules entering into deep active sites of proteins or migrating through channels in membrane transporters
http://bcb.dei.unipd.it/MolLoc MolLoc: a web tool for the local structural alignment of molecular surfaces
http://bioinformatics.charite.de/superlooper/ SuperLooper&#8212;a prediction server for the modeling of loops in globular and membrane proteins
http://proteinformatics.de/rhythm RHYTHM&#8212;a server to predict the orientation of transmembrane helices in channels and membrane-coils
http://pomelo2.bioinfo.cnio.es Pomelo II: finding differentially expressed genes
http://biit.cs.ut.ee/vishic VisHiC&#8212;hierarchical functional enrichment analysis of microarray data
http://www.homozygositymapper.org/ HomozygosityMapper&#8212;an interactive approach to homozygosity mapping
http://www.niehs.nih.gov/snpinfo SNPinfo: integrating GWAS and candidate gene information into functional SNP selection for genetic association studies
http://mgip.biology.gatech.edu Meningococcus genome informatics platform: a system for analyzing multilocus sequence typing data
http://lifecenter.sgst.cn/seppa/index.php SEPPA: a computational server for spatial epitope prediction of protein antigens
http://www.epitoolkit.org/ OptiTope&#8212;a web server for the selection of an optimal set of peptides for epitope-based vaccines
http://pubchem.ncbi.nlm.nih.gov PubChem: a public information system for analyzing bioactivities of small molecules
http://pubchem.ncbi.nlm.nih.gov/assay/ PubChem: a public information system for analyzing bioactivities of small molecules
http://hivdb.stanford.edu A standardized framework for accurate	high-throughput genotyping of recombinant and non-recombinant viral sequences
http://www.umcutrecht.nl/subsite/spread-programme/ A standardized framework for accurate	high-throughput genotyping of recombinant and non-recombinant viral sequences
http://www.hivrdb.org.uk/ A standardized framework for accurate	high-throughput genotyping of recombinant and non-recombinant viral sequences
http://bioafrica.mrc.ac.za/rega-genotype/html/ A standardized framework for accurate	high-throughput genotyping of recombinant and non-recombinant viral sequences
http://lasp.cpqgm.fiocruz.br/virus-genotype/html/ A standardized framework for accurate	high-throughput genotyping of recombinant and non-recombinant viral sequences
http://jose.med.kuleuven.be/genotypetool/html/ A standardized framework for accurate	high-throughput genotyping of recombinant and non-recombinant viral sequences
http://influenza.nhri.org.tw/ATIVS/ ATIVS: analytical tool for influenza virus surveillance
http://jphmm.gobics.de/ jpHMM: Improving the reliability of recombination prediction in HIV-1
http://www.metaboanalyst.ca MetaboAnalyst: a web server for metabolomic data analysis and interpretation
http://ms.iis.sinica.edu.tw/MaXIC-Q_Web/ MaXIC-Q Web: a fully automated web service using statistical and computational methods for protein quantitation based on stable isotope labeling and LC&#8211;MS
http://www.genmr.ca GeNMR: a web server for rapid NMR-based protein structure determination
